# Supplementary material for: Modeling single-cell phenotypes links yeast stress acclimation to transcriptional repression and pre-stress cellular states
Source: eLife. 2022 Nov 9;11:e82017. doi: 10.7554/eLife.82017 (PMC9678356; doi:10.7554/eLife.82017)
Supplement: Source data 1. — The following is a description of the data within the file ‘Source-Data-1.xls’ Each row represents data for an individual cell from strain AGY1328 (Msn2-mCherry, Dot6-GFP). There are 37 time point measurements in this table, labeled T01 through T37. Each measurement is taken 6 minutes apart (i.e T01 is at the start, T02 is 6 minutes into the experiment, T03 is 12 minutes in, and so on). T01 – T12 represent time points before NaCl is added, T13 through T22 represent the initial acute response to salt, and T23 – T37 represent the acclimated response. [Column 1] Header: cell_numb This is the unique identifier for each cell in the dataset. [Column 2] Header: colony_numb The colony_numb is different than cell_numb in that if a given cell is part of a two-cell colony, both of these cells in the colony will have the same colony_numb number, but different cell_numb numbers. For example, if two cells are part of colony 3, they will both have a 3 in their colony_numb column. For this dataset, we only analyzed colonies that were either 1 or 2 cells in size at the start of the experiment. [Column 3] Header: replicate Which of the three replicate (batch) experiments each cell comes from. [Columns 4–40] Headers: Msn2_ratio_T01 - Msn2_ratio_T37 [Columns 41–77] Headers: Dot6_ratio_T01 - Dot6_ratio_T37 Data points indicate nuclear_versus_cytoplasmic ratio (average of the top 5% of pixels divided by the median pixel intensity of all pixels in the cell) for Msn2 or Dot6, as indicated in header [Columns 78–114] Headers: col_size_T01 – col_size_T37 Each values estimates the size of the colony (measured as the number of image pixels that represent the area of a colony). [Column 115] Header: Pre_stress_growth Values represent the pre-stress growth rate, measured as the natural log of the rate of increase of colony size through the first 12 time points. [Column 116] Header: Post_stress_growth Values represent the post-stress growth rate, measured as the natural log of the rate of increase [file elife-82017-data1.xlsx]

## Sheet: AGY1328
cell_numb	colony_numb	replicate	Msn2_ratio_T01	Msn2_ratio_T02	Msn2_ratio_T03	Msn2_ratio_T04	Msn2_ratio_T05	Msn2_ratio_T06	Msn2_ratio_T07	Msn2_ratio_T08	Msn2_ratio_T09	Msn2_ratio_T10	Msn2_ratio_T11	Msn2_ratio_T12	Msn2_ratio_T13	Msn2_ratio_T14	Msn2_ratio_T15	Msn2_ratio_T16	Msn2_ratio_T17	Msn2_ratio_T18	Msn2_ratio_T19	Msn2_ratio_T20	Msn2_ratio_T21	Msn2_ratio_T22	Msn2_ratio_T23	Msn2_ratio_T24	Msn2_ratio_T25	Msn2_ratio_T26	Msn2_ratio_T27	Msn2_ratio_T28	Msn2_ratio_T29	Msn2_ratio_T30	Msn2_ratio_T31	Msn2_ratio_T32	Msn2_ratio_T33	Msn2_ratio_T34	Msn2_ratio_T35	Msn2_ratio_T36	Msn2_ratio_T37	Dot6_ratio_T01	Dot6_ratio_T02	Dot6_ratio_T03	Dot6_ratio_T04	Dot6_ratio_T05	Dot6_ratio_T06	Dot6_ratio_T07	Dot6_ratio_T08	Dot6_ratio_T09	Dot6_ratio_T10
1	1	1	1.05298	1.05313	1.0487	1.05528	1.04671	1.04482	1.04198	1.04432	1.04366	1.06509	1.06378	1.04503	1.04315	1.06725	1.13174	1.1543	1.14718	1.11163	1.09892	1.11182	1.09127	1.07606	1.05373	1.04756	1.04427	1.04148	1.05542	1.04248	1.04529	1.05643	1.05099	1.0545	1.06037	1.05843	1.04975	1.06525	1.05209	1.03852	1.04079	1.03785	1.03956	1.03684	1.03675	1.03617	1.03308	1.03368	1.03384
2	2	1	1.04439	1.04274	1.04841	1.04539	1.06602	1.04505	1.05226	1.04934	1.05258	1.05549	1.06113	1.05652	1.05468	1.05932	1.09628	1.1252	1.11315	1.10749	1.11402	1.10209	1.10966	1.09058	1.08787	1.0917	1.07378	1.08764	1.08164	1.08937	1.10447	1.10114	1.11015	1.09667	1.09695	1.0985	1.0928	1.10485	1.0905	1.05449	1.05282	1.05266	1.06749	1.0647	1.06223	1.05208	1.05507	1.05237	1.05436
3	3	1	1.04161	1.04355	1.04016	1.03868	1.03746	1.03629	1.03943	1.03868	1.03763	1.03926	1.04152	1.03936	1.03896	1.04032	1.07415	1.08369	1.09093	1.08587	1.09061	1.06707	1.06381	1.05083	1.05244	1.04493	1.04922	1.05278	1.0508	1.04815	1.05352	1.04953	1.05257	1.05582	1.05598	1.06104	1.05868	1.06914	1.0622	1.06045	1.05777	1.0659	1.05143	1.0503	1.05054	1.04838	1.0492	1.04934	1.04749
4	4	1	1.04324	1.04279	1.04249	1.04308	1.04483	1.0441	1.04463	1.04406	1.04317	1.05312	1.04786	1.05009	1.04902	1.05535	1.08546	1.0988	1.08696	1.09604	1.08948	1.09652	1.08303	1.07388	1.06827	1.06808	1.06753	1.06813	1.07923	1.0822	1.08322	1.08466	1.0958	1.1104	1.10512	1.12023	1.1093	1.11713	1.10762	1.06323	1.0592	1.05681	1.06251	1.06604	1.05531	1.05832	1.0578	1.05695	1.0654
5	2	1	1.04507	1.05034	1.04884	1.05737	1.04941	1.04813	1.04903	1.04644	1.04867	1.04736	1.05296	1.05175	1.05326	1.05431	1.08825	1.10893	1.12722	1.09706	1.10461	1.08392	1.09795	1.06676	1.08347	1.0628	1.05883	1.05965	1.06237	1.0615	1.06397	1.0644	1.06256	1.06119	1.06072	1.05701	1.05434	1.05218	1.05137	1.06098	1.06251	1.05576	1.09632	1.07244	1.05806	1.05823	1.05955	1.05973	1.05488
6	5	1	1.0488	1.05019	1.0506	1.05731	1.05071	1.04702	1.0634	1.05406	1.05223	1.05904	1.05552	1.05464	1.05811	1.0626	1.11314	1.12866	1.11337	1.11041	1.13649	1.13946	1.14348	1.15138	1.11485	1.08301	1.07979	1.07389	1.08734	1.08984	1.0843	1.08224	1.08321	1.08525	1.09645	1.07559	1.08207	1.08627	1.08779	1.07025	1.06759	1.07475	1.08854	1.06675	1.06342	1.06661	1.08201	1.07988	1.0729
7	4	1	1.04965	1.04611	1.04936	1.05384	1.04936	1.04527	1.04934	1.04629	1.04402	1.04543	1.04777	1.04426	1.04394	1.06599	1.09528	1.11156	1.12196	1.11095	1.10989	1.08056	1.08235	1.0575	1.06951	1.04593	1.04394	1.05113	1.05261	1.06328	1.0589	1.06494	1.06003	1.07272	1.06517	1.0598	1.05117	1.06484	1.05062	1.05364	1.05598	1.0525	1.05468	1.06112	1.04522	1.05086	1.05848	1.05501	1.05485
8	6	1	1.04575	1.04667	1.0462	1.04841	1.06156	1.06424	1.05766	1.07697	1.07356	1.05362	1.0487	1.05151	1.049	1.0667	1.10311	1.1385	1.1281	1.11328	1.1243	1.12214	1.07137	1.07241	1.05664	1.06914	1.05297	1.07313	1.09489	1.06649	1.09181	1.08359	1.07185	1.08426	1.07409	1.06943	1.06747	1.07141	1.06824	1.06762	1.06655	1.06584	1.06371	1.0802	1.08221	1.09365	1.11328	1.11645	1.1067
9	7	1	1.05014	1.04799	1.05075	1.05099	1.05095	1.04522	1.04816	1.0501	1.04696	1.04678	1.05019	1.04804	1.04928	1.05655	1.12081	1.12282	1.10209	1.08051	1.13884	1.06858	1.0688	1.06065	1.05907	1.05785	1.05613	1.05875	1.0588	1.06786	1.06118	1.06175	1.06839	1.06724	1.07117	1.07262	1.07573	1.07505	1.07824	1.06854	1.06501	1.06503	1.06257	1.06196	1.06147	1.06654	1.06625	1.06462	1.06691
10	8	1	1.05692	1.05612	1.04745	1.05125	1.04402	1.04387	1.04471	1.04472	1.04244	1.04941	1.0539	1.06243	1.06472	1.08004	1.10114	1.11746	1.11748	1.09747	1.09357	1.10146	1.08515	1.09745	1.07553	1.08742	1.08201	1.08343	1.09421	1.0924	1.09985	1.10023	1.09476	1.10173	1.1069	1.09425	1.09267	1.09872	1.10351	1.07445	1.06527	1.06548	1.06418	1.05455	1.05516	1.05356	1.0588	1.05099	1.05231
11	7	1	1.05266	1.0478	1.04783	1.04581	1.04986	1.0459	1.0481	1.04684	1.05054	1.05495	1.07086	1.06845	1.08825	1.12432	1.16724	1.175	1.15527	1.14761	1.13531	1.1415	1.12977	1.13458	1.13775	1.12194	1.12788	1.12131	1.12287	1.12816	1.12795	1.1131	1.12252	1.11508	1.10892	1.10448	1.10292	1.10188	1.09905	1.06571	1.06053	1.06163	1.05586	1.05729	1.0698	1.06368	1.05783	1.0563	1.06307
12	9	1	1.0687	1.06881	1.06939	1.0654	1.06696	1.06477	1.06839	1.06022	1.06104	1.05933	1.06373	1.05942	1.05571	1.07508	1.12184	1.11026	1.12162	1.11136	1.07014	1.06051	1.0527	1.06177	1.05273	1.04907	1.05027	1.05109	1.05104	1.05571	1.05271	1.05365	1.0527	1.05407	1.05683	1.04795	1.04753	1.05177	1.05071	1.06026	1.06076	1.0681	1.05664	1.05757	1.05156	1.04937	1.04812	1.04739	1.04496
13	10	1	1.048	1.04558	1.04212	1.04431	1.04671	1.04298	1.05009	1.04396	1.04235	1.04026	1.0447	1.04539	1.04918	1.08761	1.12949	1.13826	1.13938	1.11253	1.11458	1.13212	1.12134	1.10168	1.09335	1.06074	1.06026	1.05138	1.05247	1.05402	1.04986	1.05216	1.05584	1.05933	1.04856	1.04857	1.04854	1.05329	1.04953	1.04524	1.04631	1.04612	1.04585	1.04435	1.03926	1.03923	1.04032	1.03734	1.03809
14	11	1	1.03978	1.04604	1.0454	1.04434	1.04168	1.04301	1.04342	1.04667	1.04818	1.05241	1.06046	1.0617	1.0669	1.09101	1.11508	1.11646	1.10304	1.0934	1.09732	1.11185	1.09135	1.11322	1.10301	1.10065	1.11236	1.11802	1.10571	1.10359	1.12161	1.11316	1.11441	1.11505	1.12028	1.10376	1.10439	1.1046	1.09625	1.05303	1.07004	1.06807	1.07288	1.07274	1.07022	1.07073	1.06861	1.06908	1.07361
15	12	1	1.07663	1.07409	1.07812	1.0723	1.07352	1.07282	1.0729	1.06659	1.07346	1.0696	1.07411	1.06605	1.06151	1.09563	1.11763	1.12936	1.12233	1.11571	1.09972	1.07657	1.06562	1.08769	1.07373	1.05817	1.07578	1.07307	1.07329	1.06715	1.06242	1.05989	1.0608	1.06337	1.05633	1.05634	1.05505	1.05729	1.05275	1.06465	1.06117	1.04984	1.05093	1.04691	1.04544	1.04762	1.04593	1.04783	1.04414
16	9	1	1.04703	1.05209	1.05446	1.05123	1.06296	1.06347	1.06295	1.06605	1.0609	1.06401	1.06958	1.06709	1.06985	1.10587	1.12846	1.13262	1.13121	1.11172	1.09752	1.10022	1.0854	1.08355	1.07954	1.07713	1.08382	1.08496	1.09508	1.09474	1.10022	1.09618	1.10221	1.0977	1.0981	1.09464	1.09236	1.10202	1.10062	1.06232	1.05926	1.05678	1.05983	1.05452	1.05885	1.05852	1.05041	1.05061	1.05281
17	13	1	1.04791	1.05102	1.04945	1.05399	1.05166	1.05484	1.05828	1.05778	1.05559	1.06941	1.07084	1.05099	1.04674	1.06921	1.10853	1.12928	1.12159	1.11542	1.09322	1.096	1.06576	1.06109	1.05774	1.06098	1.06572	1.06847	1.06109	1.06651	1.06731	1.07072	1.07685	1.07463	1.07612	1.07147	1.07048	1.07455	1.08479	1.06141	1.07218	1.05682	1.05334	1.05524	1.05359	1.05795	1.0545	1.05376	1.05842
18	14	1	1.04844	1.05094	1.04371	1.04711	1.04357	1.04658	1.04495	1.04995	1.04599	1.04715	1.05155	1.0502	1.04897	1.08782	1.10898	1.12301	1.12613	1.13171	1.08883	1.08277	1.07872	1.06432	1.06246	1.05928	1.0608	1.06093	1.06195	1.05984	1.05839	1.05977	1.05937	1.05729	1.05829	1.06136	1.05371	1.07845	1.06704	1.06454	1.05762	1.05531	1.05078	1.05471	1.06639	1.06577	1.06653	1.05515	1.0585
19	15	1	1.05679	1.05507	1.05771	1.05914	1.05625	1.05692	1.05976	1.05841	1.05874	1.06383	1.06141	1.06549	1.06537	1.10282	1.1299	1.14285	1.12193	1.11226	1.10714	1.08924	1.08549	1.08597	1.08412	1.08881	1.09484	1.09895	1.0949	1.10312	1.10471	1.10516	1.1059	1.10868	1.09928	1.10565	1.10891	1.10811	1.10668	1.06569	1.06021	1.05689	1.05686	1.05874	1.06004	1.05586	1.05853	1.05614	1.06376
20	16	1	1.0962	1.07994	1.06556	1.08509	1.06432	1.06918	1.07244	1.11109	1.08362	1.09242	1.09142	1.10308	1.09573	1.15028	1.15978	1.17087	1.15601	1.13253	1.12787	1.14206	1.13456	1.12751	1.11472	1.11585	1.0931	1.10806	1.10115	1.12226	1.09493	1.11159	1.11363	1.10213	1.1162	1.11177	1.1033	1.09249	1.08526	1.06375	1.06415	1.06213	1.07793	1.07628	1.05763	1.05839	1.06991	1.08972	1.08604
21	17	1	1.0634	1.06723	1.05957	1.06125	1.05226	1.0444	1.04422	1.05843	1.0544	1.04889	1.04983	1.04628	1.07703	1.09867	1.14331	1.15717	1.15323	1.15484	1.12986	1.07944	1.05999	1.05942	1.05864	1.0518	1.04833	1.05249	1.04719	1.05005	1.08027	1.05348	1.06151	1.08081	1.05402	1.05387	1.05104	1.0518	1.05488	1.06635	1.05917	1.0596	1.05803	1.05543	1.05264	1.04577	1.04971	1.05827	1.05703
22	18	1	1.05766	1.0513	1.04999	1.05003	1.04997	1.04984	1.05297	1.05057	1.05284	1.05202	1.05402	1.0603	1.05973	1.08803	1.10365	1.10428	1.11	1.11644	1.11239	1.10803	1.09065	1.08175	1.06796	1.06401	1.0584	1.06059	1.05702	1.06294	1.05536	1.0578	1.05598	1.06984	1.05851	1.08334	1.05205	1.05174	1.0535	1.06966	1.06487	1.06759	1.07072	1.06186	1.05886	1.05736	1.06192	1.06227	1.06841
23	19	1	1.05361	1.05672	1.0586	1.05734	1.05364	1.05634	1.05801	1.05536	1.05079	1.05489	1.05593	1.05505	1.051	1.09838	1.13152	1.14914	1.13221	1.13606	1.11449	1.09719	1.0594	1.05839	1.0601	1.0543	1.05385	1.05617	1.0573	1.06745	1.0569	1.06313	1.05904	1.05993	1.05363	1.06365	1.05943	1.05583	1.05472	1.06033	1.05509	1.05687	1.05558	1.0528	1.04879	1.04623	1.04799	1.04925	1.05072
24	20	1	1.04762	1.04987	1.04472	1.04604	1.04694	1.04784	1.04887	1.05451	1.05052	1.04875	1.05447	1.05341	1.05189	1.08128	1.11765	1.11842	1.12029	1.10905	1.11085	1.12243	1.09644	1.08393	1.08114	1.07209	1.06891	1.06411	1.07031	1.07592	1.07571	1.09724	1.08337	1.09792	1.09187	1.09667	1.08739	1.08707	1.09995	1.07477	1.06863	1.06653	1.0672	1.06326	1.06446	1.06288	1.05813	1.06163	1.06146
25	21	1	1.0529	1.04576	1.05244	1.04826	1.04193	1.0483	1.04708	1.05273	1.05573	1.05972	1.06577	1.07361	1.08476	1.11302	1.11202	1.11432	1.11288	1.09809	1.09956	1.09181	1.09076	1.0973	1.09631	1.09517	1.10168	1.10829	1.10842	1.11708	1.1187	1.12545	1.11894	1.11933	1.12061	1.12318	1.11749	1.1166	1.10938	1.06769	1.0659	1.07369	1.0664	1.06286	1.06458	1.06275	1.06014	1.06627	1.06529
26	15	1	1.06501	1.06357	1.05379	1.06478	1.05251	1.04892	1.0515	1.0486	1.04998	1.05186	1.05135	1.05797	1.05621	1.08738	1.12956	1.13855	1.14621	1.13738	1.12222	1.0807	1.07609	1.07538	1.07371	1.07285	1.07801	1.07739	1.08937	1.08754	1.107	1.11758	1.10983	1.09679	1.10003	1.10023	1.09616	1.10833	1.10322	1.06641	1.06276	1.06123	1.06495	1.06078	1.06994	1.05543	1.05423	1.056	1.06353
27	22	1	1.04593	1.04784	1.04488	1.04648	1.04502	1.04298	1.04421	1.04421	1.04268	1.04535	1.04296	1.04656	1.04205	1.07373	1.09472	1.11864	1.11591	1.10576	1.11684	1.074	1.0658	1.05188	1.05785	1.04558	1.05188	1.04967	1.05411	1.04834	1.0482	1.04853	1.05212	1.05172	1.0501	1.04574	1.0592	1.05568	1.05077	1.08111	1.07567	1.07176	1.07213	1.06575	1.06547	1.06083	1.06272	1.06168	1.06209
28	19	1	1.07463	1.07067	1.06787	1.06118	1.0566	1.0596	1.05408	1.05133	1.05163	1.05014	1.04512	1.04584	1.04898	1.0997	1.13027	1.14958	1.1542	1.15304	1.13992	1.1292	1.07622	1.0503	1.07724	1.04776	1.04907	1.06664	1.10351	1.08888	1.13342	1.10714	1.07064	1.07041	1.05195	1.0541	1.06659	1.09095	1.06278	1.05568	1.05014	1.04659	1.04481	1.0431	1.04138	1.04507	1.04407	1.04168	1.04397
29	23	1	1.08321	1.06328	1.06245	1.07403	1.07019	1.07119	1.07319	1.07586	1.06335	1.06975	1.06868	1.06627	1.06369	1.10782	1.11798	1.12893	1.12618	1.1264	1.13169	1.13227	1.11709	1.09211	1.06049	1.09613	1.05898	1.05336	1.05247	1.08621	1.05541	1.05206	1.05626	1.06236	1.04867	1.05925	1.0497	1.06902	1.04839	1.06506	1.06066	1.05829	1.05728	1.05353	1.05092	1.05236	1.05419	1.05763	1.05432
30	24	1	1.0924	1.07075	1.06021	1.07503	1.07255	1.05207	1.0662	1.04861	1.04595	1.05898	1.04545	1.04341	1.04409	1.08969	1.10862	1.13092	1.14086	1.14131	1.12982	1.10861	1.10412	1.10608	1.0858	1.05949	1.07553	1.06009	1.0728	1.08231	1.08223	1.11678	1.10718	1.10463	1.08667	1.12436	1.09704	1.06148	1.05851	1.07411	1.09504	1.06755	1.06701	1.08476	1.07263	1.06739	1.05585	1.04996	1.05017
31	24	1	1.06461	1.05679	1.05091	1.04124	1.04766	1.04696	1.04708	1.0424	1.04379	1.04697	1.04981	1.05261	1.04952	1.06814	1.10055	1.11488	1.10351	1.08936	1.07046	1.05756	1.05664	1.05794	1.05174	1.0521	1.05263	1.05331	1.05695	1.05688	1.06119	1.07006	1.06279	1.05449	1.05766	1.05425	1.08109	1.07322	1.12118	1.06593	1.08666	1.09422	1.0531	1.05572	1.06059	1.05831	1.0523	1.05144	1.05241
32	21	1	1.05104	1.04533	1.04646	1.04528	1.04655	1.04692	1.05218	1.05322	1.04928	1.05136	1.05697	1.06291	1.07713	1.11	1.1316	1.13283	1.12627	1.11978	1.11138	1.12627	1.11811	1.1238	1.12953	1.12038	1.10465	1.11708	1.09649	1.11329	1.09648	1.09271	1.0956	1.09317	1.09342	1.08006	1.07988	1.07337	1.07137	1.05975	1.0521	1.05823	1.05616	1.05458	1.05335	1.05192	1.05039	1.05054	1.05232
33	25	1	1.04703	1.0469	1.04867	1.04582	1.0455	1.04091	1.04316	1.05039	1.04973	1.04837	1.04286	1.0466	1.05703	1.08672	1.13024	1.12781	1.1142	1.12471	1.09096	1.09652	1.05514	1.05582	1.0513	1.04809	1.04857	1.05739	1.06092	1.05113	1.05153	1.05731	1.06462	1.05564	1.05278	1.04828	1.04894	1.04873	1.04965	1.05392	1.04693	1.04909	1.05062	1.05025	1.05006	1.04806	1.04808	1.04798	1.04765
34	26	1	1.05059	1.04732	1.04843	1.04797	1.04504	1.04829	1.04617	1.04852	1.04961	1.04966	1.05612	1.05085	1.05216	1.11047	1.13724	1.14757	1.13069	1.13971	1.12262	1.10583	1.0931	1.09339	1.09041	1.08416	1.09124	1.10425	1.10913	1.10469	1.11353	1.11108	1.11449	1.11038	1.1187	1.10656	1.11187	1.10514	1.10329	1.07849	1.06022	1.05893	1.05718	1.05704	1.05884	1.05758	1.05675	1.05855	1.06203
35	27	1	1.06598	1.05852	1.05614	1.05849	1.06283	1.05215	1.05398	1.04746	1.04446	1.04362	1.04665	1.04013	1.04617	1.07575	1.09749	1.08875	1.06996	1.08253	1.07125	1.08058	1.04994	1.05377	1.04482	1.04264	1.04281	1.05763	1.04761	1.04916	1.04994	1.04927	1.05288	1.04858	1.04655	1.04492	1.04776	1.04576	1.04509	1.09349	1.06882	1.07285	1.06885	1.06686	1.06234	1.06215	1.05963	1.05394	1.05697
36	28	1	1.07808	1.08649	1.08959	1.09359	1.07896	1.08461	1.07911	1.08962	1.08347	1.08442	1.08768	1.09071	1.0878	1.11933	1.1402	1.13481	1.1294	1.11925	1.109	1.09883	1.10232	1.09821	1.0947	1.08477	1.07987	1.08229	1.08477	1.07995	1.07978	1.0776	1.08109	1.07551	1.07484	1.06758	1.06813	1.06824	1.06498	1.06112	1.05286	1.05174	1.06102	1.05219	1.04799	1.04692	1.04497	1.04539	1.0457
37	29	1	1.05227	1.04527	1.05213	1.04474	1.04731	1.04318	1.04201	1.04666	1.04903	1.04645	1.05008	1.04641	1.04706	1.0922	1.13967	1.13713	1.12387	1.11334	1.08495	1.04751	1.04714	1.0464	1.04354	1.04758	1.04353	1.0427	1.04281	1.04717	1.04605	1.04198	1.0668	1.05262	1.0466	1.05769	1.05048	1.05419	1.04881	1.04306	1.03562	1.03473	1.03474	1.03402	1.03261	1.03368	1.03456	1.03532	1.03563
38	28	1	1.05452	1.04465	1.05565	1.04583	1.04551	1.04958	1.05676	1.05815	1.06485	1.07963	1.06905	1.06189	1.07544	1.11012	1.12509	1.13557	1.13104	1.14298	1.11492	1.13203	1.14399	1.11677	1.11961	1.12638	1.08801	1.08506	1.09093	1.06557	1.07745	1.07662	1.07084	1.07579	1.07775	1.07602	1.07347	1.07064	1.07222	1.07105	1.06243	1.066	1.07672	1.06066	1.05732	1.0575	1.05593	1.0593	1.06553
39	30	1	1.07102	1.06113	1.05461	1.05569	1.05066	1.05276	1.0529	1.05308	1.05475	1.0566	1.05714	1.05538	1.05397	1.101	1.11152	1.1164	1.12441	1.08021	1.09789	1.09364	1.10624	1.08388	1.06303	1.05789	1.05541	1.05959	1.07875	1.09926	1.06431	1.07371	1.08688	1.07221	1.08053	1.06314	1.06222	1.07591	1.06933	1.08042	1.06792	1.06227	1.06567	1.05703	1.05568	1.05599	1.05665	1.06217	1.0635
40	31	1	1.05026	1.04975	1.04663	1.04342	1.04363	1.04016	1.04086	1.04937	1.04686	1.0521	1.04979	1.05191	1.05191	1.10097	1.09712	1.10723	1.08602	1.07543	1.05901	1.06278	1.06525	1.06216	1.06973	1.06658	1.06532	1.07258	1.06774	1.07355	1.07156	1.07519	1.08852	1.09333	1.10051	1.09145	1.10207	1.10802	1.1028	1.0738	1.05502	1.05162	1.0505	1.04775	1.04613	1.0425	1.04394	1.04559	1.04593
41	32	1	1.04444	1.04485	1.04926	1.04498	1.0455	1.07957	1.05169	1.04295	1.0401	1.04226	1.04339	1.03911	1.04801	1.07778	1.10608	1.11735	1.14008	1.1406	1.11909	1.10065	1.08961	1.0476	1.04032	1.04092	1.04108	1.07304	1.0582	1.04194	1.05353	1.04412	1.04718	1.05287	1.04332	1.04462	1.04206	1.04623	1.04029	1.05897	1.05435	1.04989	1.05143	1.045	1.0457	1.04548	1.04529	1.04169	1.04102
42	30	1	1.05036	1.04859	1.04758	1.04813	1.04395	1.04346	1.04913	1.05144	1.04637	1.04927	1.04889	1.05091	1.04816	1.08554	1.11139	1.11169	1.07061	1.06753	1.07388	1.08432	1.08232	1.08318	1.08276	1.07768	1.10061	1.0956	1.09751	1.08513	1.0863	1.08449	1.09505	1.0957	1.08921	1.08402	1.09037	1.08101	1.08921	1.06817	1.05944	1.05572	1.05724	1.05698	1.05531	1.0587	1.05237	1.05047	1.05535
43	33	1	1.04993	1.04486	1.04527	1.04603	1.04462	1.04323	1.04464	1.04437	1.04571	1.0441	1.04416	1.04387	1.05875	1.07613	1.08855	1.09477	1.10528	1.0978	1.11035	1.07269	1.05183	1.05209	1.05851	1.05655	1.04851	1.049	1.05028	1.05344	1.0544	1.0563	1.04973	1.0552	1.05574	1.05001	1.05011	1.05285	1.05321	1.06152	1.05458	1.05433	1.05328	1.05366	1.0486	1.052	1.04908	1.04815	1.05081
44	34	1	1.0376	1.03699	1.03589	1.03836	1.03507	1.03712	1.03955	1.03739	1.03782	1.03936	1.03733	1.03754	1.03828	1.07707	1.0856	1.09668	1.08385	1.05964	1.04958	1.04887	1.04911	1.04935	1.04571	1.04415	1.04867	1.04777	1.04746	1.04845	1.05092	1.05046	1.05365	1.0568	1.06196	1.06438	1.06867	1.10008	1.09694	1.06653	1.05269	1.05404	1.0519	1.05184	1.05018	1.04644	1.04729	1.04706	1.04439
45	35	1	1.05095	1.05323	1.05221	1.05001	1.05053	1.05094	1.05159	1.05005	1.04627	1.05071	1.04989	1.05018	1.0497	1.11109	1.15032	1.1687	1.1592	1.1574	1.11991	1.12448	1.07721	1.05445	1.06279	1.06193	1.0514	1.0588	1.07945	1.08888	1.07563	1.06276	1.05576	1.05078	1.05639	1.04879	1.06449	1.07465	1.04941	1.04196	1.04129	1.03739	1.0388	1.03786	1.03724	1.03878	1.03849	1.03559	1.03739
46	36	1	1.0444	1.04415	1.04303	1.04023	1.04235	1.03832	1.04235	1.04176	1.04611	1.04685	1.04788	1.04834	1.05031	1.09628	1.10109	1.10561	1.0891	1.09748	1.09445	1.07346	1.09595	1.07955	1.08721	1.08353	1.08099	1.08953	1.09095	1.10491	1.12124	1.1036	1.10909	1.10547	1.10661	1.10724	1.11093	1.1095	1.1057	1.05577	1.04744	1.04835	1.04514	1.04628	1.04571	1.0493	1.04556	1.04211	1.04578
47	36	1	1.04917	1.0509	1.05309	1.05217	1.05102	1.04813	1.05472	1.04909	1.05037	1.04752	1.04824	1.05163	1.05368	1.09392	1.11667	1.12687	1.12525	1.1278	1.11947	1.11645	1.0591	1.05354	1.04794	1.04626	1.06896	1.0658	1.07019	1.07278	1.05189	1.07121	1.07861	1.06156	1.06411	1.0457	1.05984	1.05914	1.06614	1.06441	1.05407	1.05571	1.05533	1.05625	1.0576	1.0644	1.05977	1.0525	1.05431
48	35	1	1.06017	1.05256	1.06332	1.05815	1.04594	1.04205	1.04764	1.04985	1.0445	1.04577	1.04001	1.04688	1.0458	1.07219	1.08862	1.10566	1.08586	1.07843	1.08705	1.0428	1.04572	1.05576	1.04785	1.04266	1.04088	1.04432	1.04324	1.04205	1.04288	1.04167	1.0419	1.04288	1.04412	1.0424	1.04512	1.04246	1.04516	1.03981	1.03744	1.03516	1.0338	1.03325	1.03328	1.0324	1.03391	1.03306	1.03118
49	34	1	1.04275	1.04382	1.0438	1.04412	1.04086	1.03928	1.04219	1.04158	1.04263	1.0462	1.04364	1.04297	1.04327	1.08175	1.10611	1.1057	1.0829	1.08636	1.09631	1.08078	1.05883	1.05408	1.05302	1.05142	1.05004	1.04836	1.05024	1.05126	1.05366	1.05275	1.05626	1.05428	1.05104	1.0509	1.05403	1.04966	1.04775	1.05961	1.05571	1.05606	1.05273	1.05369	1.05282	1.05157	1.05123	1.04924	1.0508
50	37	1	1.05727	1.05385	1.05318	1.05092	1.04646	1.04987	1.05107	1.06149	1.0524	1.05837	1.05593	1.05484	1.0711	1.11366	1.12445	1.14284	1.13239	1.12118	1.13683	1.11119	1.08888	1.06992	1.07249	1.06122	1.0646	1.08934	1.09761	1.07944	1.0582	1.05737	1.064	1.05632	1.05604	1.06448	1.05174	1.05571	1.0522	1.09135	1.07316	1.07295	1.06623	1.06632	1.06625	1.08176	1.12198	1.0683	1.07769
51	38	1	1.06009	1.06011	1.05703	1.05745	1.06017	1.05708	1.06071	1.06663	1.05941	1.05926	1.05727	1.05971	1.06148	1.09551	1.11345	1.12357	1.12342	1.11996	1.11855	1.08817	1.05929	1.05854	1.05238	1.05099	1.04755	1.06509	1.06303	1.05335	1.05248	1.05375	1.05818	1.06878	1.06301	1.04969	1.05034	1.05117	1.04486	1.07759	1.05632	1.05354	1.05344	1.05576	1.0723	1.0524	1.06012	1.06312	1.05689
52	39	1	1.05514	1.0517	1.04856	1.04882	1.0511	1.07245	1.06397	1.05692	1.0487	1.0467	1.0502	1.04842	1.05688	1.09543	1.1395	1.14837	1.13368	1.12779	1.12479	1.08767	1.09169	1.06292	1.06146	1.05918	1.05986	1.06535	1.08143	1.06618	1.07847	1.08518	1.09871	1.07118	1.07084	1.07865	1.06884	1.06966	1.0681	1.08007	1.06678	1.06379	1.06157	1.06043	1.08264	1.10939	1.12811	1.06519	1.05698
53	40	1	1.07994	1.07302	1.06588	1.06567	1.05451	1.05224	1.05276	1.05198	1.04692	1.04933	1.04881	1.04794	1.07165	1.10969	1.15289	1.16004	1.14122	1.14601	1.09	1.10209	1.06079	1.05295	1.04879	1.05617	1.04858	1.05209	1.05709	1.07089	1.07014	1.05798	1.04929	1.05593	1.07309	1.07665	1.05174	1.06936	1.04952	1.0801	1.06847	1.06139	1.05591	1.04823	1.04635	1.04648	1.04399	1.0439	1.04677
54	41	1	1.05534	1.05066	1.05291	1.05397	1.05496	1.05874	1.05521	1.05127	1.07392	1.06437	1.05824	1.05774	1.07433	1.10702	1.11325	1.11938	1.08878	1.07988	1.11414	1.08725	1.10759	1.08343	1.07166	1.06964	1.07251	1.07165	1.08441	1.07676	1.07939	1.07409	1.08313	1.08241	1.08316	1.10139	1.08839	1.09504	1.09913	1.08476	1.07347	1.07231	1.07341	1.06741	1.09524	1.07214	1.0706	1.09126	1.14086
55	42	1	1.04768	1.04418	1.04487	1.0413	1.04179	1.04093	1.04795	1.05326	1.04503	1.04424	1.04311	1.04111	1.04415	1.1132	1.10107	1.11202	1.10499	1.0945	1.10688	1.10364	1.08644	1.06706	1.04948	1.05154	1.05457	1.04746	1.05296	1.0694	1.06819	1.06915	1.055	1.06479	1.05859	1.05874	1.0565	1.05641	1.05969	1.06903	1.06099	1.06175	1.05918	1.05775	1.05873	1.05867	1.10215	1.06812	1.05969
56	43	1	1.04304	1.04214	1.03901	1.04623	1.04103	1.04182	1.04139	1.04345	1.04532	1.04436	1.04596	1.04559	1.05282	1.10457	1.10118	1.11273	1.08143	1.08101	1.10111	1.08253	1.05839	1.0584	1.05405	1.0691	1.06111	1.0761	1.07766	1.0695	1.06855	1.07796	1.0811	1.09021	1.0758	1.0786	1.08073	1.0769	1.08352	1.06156	1.05657	1.05377	1.05489	1.06479	1.04687	1.04783	1.04788	1.04805	1.05026
57	44	1	1.07619	1.06745	1.0711	1.07945	1.069	1.06962	1.07499	1.07999	1.07411	1.08588	1.08823	1.09185	1.10628	1.1831	1.18212	1.17584	1.17651	1.14884	1.13546	1.11458	1.14137	1.12198	1.10643	1.12314	1.11189	1.10578	1.10659	1.11042	1.11226	1.10478	1.11498	1.10255	1.09426	1.09756	1.09501	1.09147	1.10226	1.06991	1.06168	1.06009	1.07305	1.06837	1.05801	1.0558	1.05201	1.05392	1.05246
58	45	1	1.04747	1.04383	1.0422	1.06168	1.04665	1.04088	1.04484	1.04667	1.04376	1.04786	1.04426	1.04461	1.07087	1.10374	1.11076	1.12979	1.12518	1.11828	1.11161	1.08775	1.07615	1.04938	1.04091	1.04281	1.04477	1.04926	1.05509	1.04768	1.04909	1.04589	1.04641	1.05654	1.05111	1.06027	1.04854	1.04497	1.0445	1.0614	1.05297	1.05159	1.05174	1.05424	1.05488	1.05751	1.05504	1.05603	1.05509
59	43	1	1.04685	1.04363	1.04496	1.04448	1.04617	1.05035	1.04666	1.0429	1.05105	1.05107	1.05149	1.05093	1.06689	1.09568	1.09462	1.11641	1.10148	1.12635	1.10997	1.06276	1.05573	1.0664	1.05538	1.05971	1.05802	1.05636	1.06114	1.05853	1.06404	1.06621	1.06821	1.06531	1.06821	1.06804	1.07177	1.07018	1.07195	1.06288	1.05185	1.05085	1.05011	1.04911	1.05357	1.05755	1.05168	1.05145	1.04922
60	46	1	1.05174	1.05171	1.05234	1.049	1.04878	1.0479	1.04706	1.04791	1.0548	1.04996	1.05012	1.04957	1.05345	1.11329	1.11011	1.12903	1.10626	1.07643	1.12387	1.10001	1.0619	1.0575	1.05266	1.05497	1.05505	1.05482	1.05389	1.07981	1.08628	1.07071	1.0889	1.08322	1.10133	1.10691	1.11522	1.07505	1.06006	1.0788	1.06927	1.06407	1.06487	1.06194	1.06069	1.06153	1.06101	1.06107	1.06377
61	47	1	1.0379	1.04084	1.04558	1.04208	1.0376	1.04816	1.03885	1.03915	1.04167	1.04033	1.04248	1.0419	1.04364	1.07814	1.106	1.11034	1.10494	1.10906	1.07087	1.07082	1.05404	1.05376	1.06014	1.04522	1.04751	1.04753	1.04877	1.04857	1.0511	1.04895	1.05331	1.05347	1.05121	1.05285	1.05252	1.05274	1.04986	1.05948	1.0593	1.06499	1.06925	1.05534	1.06198	1.06845	1.05323	1.05334	1.05208
62	45	1	1.04439	1.041	1.03803	1.03779	1.04265	1.03662	1.03908	1.0516	1.03936	1.04039	1.042	1.0392	1.04076	1.08606	1.09428	1.09362	1.08205	1.10213	1.10219	1.06527	1.0518	1.04549	1.044	1.04489	1.04454	1.04489	1.04978	1.04651	1.04877	1.04979	1.05034	1.05144	1.05115	1.05425	1.06287	1.05179	1.05281	1.05427	1.05084	1.04495	1.04494	1.04962	1.04614	1.04899	1.04871	1.05099	1.05248
63	44	1	1.10626	1.09044	1.09824	1.09055	1.09186	1.09268	1.08657	1.08756	1.08785	1.09417	1.10003	1.09855	1.10599	1.162	1.16997	1.17055	1.16889	1.14658	1.14059	1.13477	1.13395	1.10455	1.10264	1.09613	1.10265	1.09597	1.09582	1.0942	1.09178	1.09574	1.09523	1.09038	1.08614	1.08261	1.07856	1.07759	1.07998	1.06015	1.05434	1.05611	1.05975	1.05401	1.0593	1.05694	1.05313	1.05808	1.05901
64	48	1	1.04811	1.04588	1.04257	1.04411	1.04208	1.03907	1.04594	1.04174	1.04381	1.04479	1.04466	1.04309	1.04973	1.08332	1.09576	1.11529	1.10574	1.1011	1.10967	1.09833	1.074	1.06104	1.04841	1.04597	1.04116	1.04617	1.05769	1.04915	1.04489	1.04685	1.04621	1.04708	1.04668	1.05133	1.05412	1.05795	1.061	1.06157	1.05207	1.04975	1.05008	1.04377	1.04322	1.05021	1.04309	1.04341	1.04671
65	49	1	1.09746	1.07386	1.06195	1.06264	1.05759	1.05865	1.05738	1.05422	1.05808	1.05412	1.05572	1.05245	1.05647	1.10443	1.11983	1.12534	1.1404	1.12165	1.12807	1.12598	1.08479	1.06912	1.04874	1.05104	1.06208	1.05178	1.07059	1.05654	1.06207	1.05183	1.0511	1.05491	1.0509	1.05069	1.05726	1.05667	1.05278	1.06752	1.05668	1.05235	1.04753	1.04542	1.04992	1.04729	1.04593	1.04917	1.04915
66	50	1	1.05269	1.04892	1.03992	1.04168	1.03895	1.0392	1.0404	1.04217	1.04245	1.05	1.04726	1.04519	1.05212	1.11134	1.11182	1.12226	1.11462	1.08743	1.11982	1.10927	1.09765	1.07528	1.06809	1.0662	1.07281	1.08477	1.07834	1.08226	1.08841	1.09411	1.11577	1.11452	1.1079	1.10407	1.11063	1.11538	1.11818	1.06779	1.05631	1.05268	1.05331	1.05022	1.05314	1.05244	1.05353	1.05572	1.05934
67	51	1	1.06345	1.05841	1.05315	1.06396	1.04918	1.04723	1.04835	1.0512	1.04771	1.04834	1.0485	1.04738	1.0519	1.12245	1.14199	1.13245	1.07762	1.10122	1.10551	1.04553	1.04626	1.04895	1.04485	1.06387	1.04854	1.05086	1.04512	1.0461	1.05066	1.04659	1.053	1.0445	1.04944	1.04689	1.04407	1.04896	1.06203	1.0557	1.04634	1.04463	1.04297	1.04335	1.04008	1.0396	1.04083	1.0428	1.043
68	51	1	1.04491	1.0491	1.05003	1.04836	1.07102	1.06176	1.04365	1.05131	1.06094	1.04925	1.04682	1.05052	1.05596	1.12832	1.14902	1.1425	1.14043	1.13124	1.13532	1.10433	1.10204	1.09105	1.0543	1.05006	1.05655	1.05571	1.06695	1.05067	1.05877	1.04809	1.04929	1.04685	1.04958	1.06315	1.0551	1.05505	1.05324	1.05494	1.05093	1.04868	1.04749	1.04623	1.04585	1.04513	1.04203	1.04635	1.04647
69	52	1	1.04601	1.04509	1.05295	1.04573	1.04619	1.0459	1.04468	1.04596	1.04436	1.05266	1.04746	1.0467	1.06111	1.09247	1.10879	1.12935	1.08264	1.06419	1.06348	1.09562	1.06536	1.05637	1.05187	1.04509	1.05313	1.05881	1.0573	1.07404	1.07516	1.05006	1.05144	1.05574	1.04727	1.05387	1.05304	1.0526	1.04982	1.04336	1.03952	1.04009	1.03899	1.03592	1.03636	1.03579	1.03782	1.03561	1.03696
70	53	1	1.0605	1.05927	1.06696	1.0699	1.07172	1.06547	1.07667	1.06806	1.06317	1.05717	1.05731	1.06257	1.07255	1.13815	1.1494	1.14663	1.12454	1.10886	1.07561	1.05835	1.05884	1.06058	1.06988	1.05358	1.05499	1.06169	1.06809	1.0742	1.05834	1.05886	1.0703	1.05872	1.06213	1.06716	1.06591	1.07786	1.08033	1.07609	1.08133	1.07076	1.06408	1.06951	1.07768	1.07146	1.07941	1.06456	1.0596
71	54	1	1.07382	1.0671	1.06404	1.05432	1.05515	1.05428	1.05453	1.05456	1.05889	1.06026	1.05979	1.06431	1.08815	1.1363	1.15442	1.15816	1.12804	1.12957	1.10664	1.10148	1.0967	1.09381	1.08699	1.07574	1.07711	1.08764	1.08731	1.0935	1.09855	1.10422	1.10557	1.10047	1.10388	1.10083	1.11559	1.11478	1.11455	1.07829	1.06272	1.06105	1.05565	1.05195	1.05033	1.05048	1.05064	1.05213	1.05739
72	55	1	1.05385	1.05756	1.05359	1.0514	1.04853	1.04796	1.04752	1.05057	1.04837	1.0506	1.04918	1.04683	1.04507	1.10674	1.12652	1.09254	1.10673	1.11415	1.11431	1.08538	1.0964	1.08612	1.06044	1.06319	1.05951	1.06131	1.06712	1.07021	1.08315	1.0772	1.06388	1.06041	1.06417	1.06305	1.06551	1.07365	1.06918	1.06182	1.06016	1.05326	1.05025	1.05024	1.05154	1.04935	1.04596	1.05152	1.05307
73	55	1	1.04648	1.04266	1.0415	1.03922	1.03856	1.03979	1.04165	1.04031	1.04631	1.04742	1.04931	1.04831	1.04789	1.10971	1.10271	1.11184	1.08802	1.11655	1.10838	1.10518	1.06808	1.05549	1.05077	1.05777	1.05301	1.05433	1.05254	1.0541	1.05624	1.05624	1.05205	1.06077	1.04855	1.05374	1.04934	1.05582	1.0553	1.06435	1.0588	1.05175	1.0518	1.05119	1.05071	1.04901	1.04999	1.05175	1.05108
74	56	1	1.05277	1.05716	1.04651	1.04651	1.03934	1.03902	1.0422	1.05853	1.04468	1.04195	1.04109	1.0426	1.04404	1.08365	1.10658	1.11114	1.10773	1.091	1.08438	1.04998	1.05197	1.05305	1.04657	1.04759	1.04804	1.04907	1.06357	1.05665	1.05523	1.05484	1.06769	1.05449	1.04967	1.05416	1.05726	1.05609	1.05674	1.05465	1.0499	1.0479	1.04676	1.04635	1.04446	1.04509	1.04723	1.04571	1.04457
75	56	1	1.05875	1.05798	1.05752	1.06003	1.07166	1.05421	1.04638	1.04467	1.05215	1.05181	1.04986	1.05433	1.06185	1.10544	1.12242	1.138	1.12811	1.13166	1.11728	1.11252	1.07046	1.05483	1.0533	1.0511	1.05238	1.05408	1.06066	1.05355	1.06089	1.05102	1.05372	1.05983	1.05762	1.05639	1.05804	1.06633	1.05282	1.06116	1.05287	1.06363	1.05695	1.06722	1.06139	1.05032	1.05142	1.05139	1.0507
76	57	1	1.05132	1.04977	1.04798	1.04653	1.04792	1.04503	1.04349	1.04797	1.04781	1.05209	1.05318	1.05176	1.0614	1.11656	1.12693	1.13605	1.11834	1.12591	1.08297	1.07676	1.06664	1.06962	1.06995	1.06408	1.06264	1.08441	1.08092	1.07622	1.06663	1.06798	1.06712	1.07128	1.06144	1.06174	1.05552	1.09408	1.07287	1.06604	1.05851	1.05131	1.05362	1.05186	1.04966	1.05298	1.05316	1.05351	1.05504
77	58	1	1.05759	1.05636	1.05496	1.05429	1.0472	1.04736	1.04486	1.04789	1.04991	1.0495	1.04851	1.04629	1.05339	1.10711	1.13129	1.14324	1.14231	1.13221	1.12616	1.09495	1.091	1.05559	1.04995	1.04864	1.0576	1.04969	1.04702	1.04966	1.07526	1.06125	1.05744	1.06949	1.06337	1.05745	1.04977	1.07914	1.06556	1.06374	1.05245	1.05288	1.04885	1.05131	1.05028	1.04778	1.0518	1.05364	1.05562
78	58	1	1.05722	1.06656	1.05208	1.06102	1.05847	1.05838	1.05224	1.04926	1.055	1.05138	1.051	1.05154	1.05263	1.11965	1.13823	1.15103	1.14823	1.09165	1.08089	1.06535	1.05791	1.05509	1.05073	1.05413	1.05476	1.05316	1.05656	1.05662	1.05269	1.05846	1.05649	1.06109	1.05804	1.0547	1.06755	1.05235	1.05172	1.07244	1.06522	1.06218	1.05834	1.05693	1.05947	1.06118	1.06059	1.05847	1.0579
79	59	1	1.05973	1.05473	1.05961	1.05886	1.05367	1.06513	1.05327	1.04841	1.04798	1.04765	1.04973	1.04914	1.05261	1.0911	1.11333	1.11921	1.11626	1.10549	1.10505	1.09693	1.07724	1.05258	1.06073	1.04854	1.05476	1.04831	1.05937	1.05648	1.05434	1.05146	1.05041	1.05273	1.04686	1.0472	1.04898	1.05012	1.04943	1.07516	1.06927	1.06679	1.07518	1.07773	1.07944	1.07364	1.05559	1.05316	1.05329
80	60	1	1.04157	1.04097	1.04394	1.04123	1.04466	1.04342	1.06335	1.04609	1.04579	1.05452	1.05271	1.06131	1.0549	1.11611	1.13717	1.13094	1.09499	1.14013	1.11134	1.12542	1.11296	1.11231	1.09129	1.09767	1.08941	1.06945	1.07603	1.07982	1.11806	1.10523	1.11142	1.11574	1.10188	1.07799	1.08994	1.08329	1.08705	1.06091	1.05525	1.06801	1.05787	1.05752	1.06278	1.08569	1.07334	1.05198	1.06034
81	61	2	1.0474	1.0447	1.04587	1.04608	1.04932	1.048	1.04893	1.04787	1.04862	1.04878	1.0494	1.0483	1.04686	1.07595	1.11495	1.11287	1.07504	1.07742	1.06387	1.06226	1.05605	1.05811	1.06229	1.05497	1.05766	1.05888	1.06774	1.06966	1.07192	1.05893	1.07063	1.0631	1.05855	1.05846	1.06149	1.05856	1.06046	1.05402	1.05626	1.05526	1.05345	1.0534	1.05953	1.05444	1.05567	1.05592	1.0571
82	62	2	1.0499	1.05695	1.06325	1.06067	1.06658	1.06737	1.07106	1.07481	1.07622	1.07504	1.08561	1.09727	1.08641	1.1056	1.12336	1.13423	1.10236	1.09317	1.09052	1.09369	1.10546	1.10138	1.09505	1.11197	1.10394	1.09256	1.10219	1.09485	1.09624	1.08863	1.09	1.08668	1.08612	1.08545	1.08377	1.07669	1.07998	1.0521	1.05123	1.0581	1.05252	1.05035	1.04895	1.05333	1.05506	1.05373	1.05226
83	63	2	1.0645	1.06217	1.06411	1.07386	1.08218	1.0881	1.08995	1.09508	1.09969	1.09893	1.09981	1.11406	1.11465	1.15143	1.16251	1.16816	1.13211	1.12966	1.12278	1.1155	1.10859	1.10847	1.10066	1.09567	1.09416	1.09054	1.08689	1.08076	1.07673	1.07273	1.06908	1.07186	1.07222	1.06653	1.06885	1.0623	1.06767	1.06052	1.05941	1.05482	1.05649	1.06208	1.05887	1.05808	1.05369	1.05598	1.05875
84	62	2	1.0441	1.04289	1.04206	1.04312	1.04444	1.04447	1.04818	1.05002	1.05704	1.05931	1.05887	1.06216	1.067	1.08728	1.10125	1.11075	1.09084	1.08653	1.07557	1.06831	1.06102	1.06132	1.06244	1.05974	1.0585	1.05776	1.06047	1.06512	1.06607	1.08075	1.07093	1.06894	1.07349	1.07177	1.09027	1.0703	1.09867	1.06087	1.06189	1.06152	1.05945	1.0605	1.06738	1.06702	1.06767	1.06765	1.06231
85	64	2	1.05417	1.05604	1.05406	1.05557	1.05582	1.05647	1.05509	1.05299	1.05346	1.05509	1.06799	1.06455	1.06476	1.10858	1.14113	1.14268	1.13505	1.13255	1.11955	1.08887	1.0757	1.06091	1.07867	1.05821	1.04923	1.06966	1.06781	1.0495	1.05081	1.05673	1.04984	1.05152	1.05561	1.04927	1.05215	1.04843	1.05326	1.05024	1.05083	1.05476	1.04787	1.05353	1.05233	1.05539	1.0505	1.05227	1.0491
86	63	2	1.06499	1.07954	1.08796	1.1006	1.09713	1.09724	1.10239	1.11159	1.11585	1.10092	1.11011	1.1332	1.12298	1.15045	1.1489	1.16474	1.14238	1.12472	1.10924	1.11941	1.1086	1.10684	1.10194	1.12097	1.10852	1.10247	1.10005	1.09592	1.09466	1.08607	1.08175	1.08597	1.08495	1.08151	1.07721	1.07167	1.074	1.05037	1.05312	1.05448	1.05311	1.06236	1.06004	1.06884	1.06239	1.06146	1.0611
87	64	2	1.0395	1.0424	1.0411	1.04404	1.04185	1.04311	1.04444	1.0481	1.04624	1.05028	1.05077	1.05065	1.05458	1.08238	1.11168	1.11264	1.12459	1.10849	1.08654	1.06691	1.06601	1.06085	1.06558	1.06227	1.06199	1.06823	1.06778	1.06902	1.07618	1.07708	1.08345	1.09625	1.1013	1.09486	1.10026	1.1008	1.10753	1.05156	1.05561	1.05817	1.05749	1.05762	1.05906	1.05943	1.05879	1.05833	1.05637
88	65	2	1.04545	1.04529	1.04487	1.04923	1.04774	1.04721	1.04158	1.05435	1.04496	1.04192	1.04308	1.05048	1.05019	1.07079	1.08773	1.09146	1.06347	1.07152	1.06689	1.06476	1.06465	1.06647	1.0639	1.06957	1.08157	1.08396	1.08086	1.06371	1.09329	1.0916	1.08573	1.09658	1.1078	1.10266	1.11075	1.10843	1.10615	1.05176	1.04926	1.04949	1.05262	1.04763	1.04993	1.04337	1.05019	1.06078	1.05055
89	66	2	1.03843	1.04019	1.03826	1.0411	1.04011	1.04142	1.04161	1.04243	1.03953	1.04459	1.04697	1.04944	1.04413	1.08821	1.14359	1.14233	1.13648	1.07466	1.07617	1.04639	1.04953	1.05075	1.04831	1.06367	1.05147	1.04965	1.0626	1.04516	1.05507	1.05377	1.07172	1.07847	1.0758	1.06047	1.05494	1.05391	1.04976	1.04605	1.04692	1.04463	1.04299	1.04181	1.04279	1.04453	1.04525	1.04416	1.04261
90	65	2	1.05931	1.05498	1.05798	1.06723	1.05935	1.05947	1.0597	1.06468	1.05992	1.05734	1.05343	1.06366	1.05796	1.08112	1.12371	1.14131	1.12676	1.11261	1.1052	1.09757	1.0758	1.0674	1.06651	1.0628	1.06088	1.05778	1.0629	1.0629	1.06711	1.06006	1.05934	1.05932	1.06823	1.06306	1.0656	1.06689	1.067	1.0602	1.06181	1.05709	1.08785	1.05759	1.05345	1.0501	1.05469	1.07314	1.05114
91	67	2	1.05088	1.05132	1.05203	1.05306	1.05676	1.05416	1.05899	1.06133	1.05931	1.06011	1.05765	1.05915	1.06606	1.08857	1.11825	1.10418	1.09804	1.09143	1.09667	1.10524	1.08412	1.07883	1.08597	1.08824	1.08632	1.09143	1.08739	1.0986	1.11259	1.10301	1.10498	1.11481	1.12422	1.11883	1.12055	1.12543	1.11034	1.05381	1.05631	1.05705	1.05618	1.05457	1.05254	1.05129	1.05135	1.05142	1.05379
92	68	2	1.045	1.0436	1.04433	1.0447	1.04887	1.04738	1.04627	1.04531	1.04475	1.04423	1.04445	1.0469	1.04622	1.08657	1.11754	1.11747	1.12787	1.11067	1.06135	1.05689	1.05857	1.05228	1.05314	1.05295	1.05686	1.05321	1.0504	1.05255	1.05811	1.05497	1.06142	1.05535	1.05586	1.05423	1.06012	1.06311	1.05252	1.06204	1.06247	1.05791	1.05873	1.06078	1.05943	1.05936	1.06092	1.0581	1.05739
93	67	2	1.0626	1.06456	1.06655	1.0656	1.06807	1.06567	1.0687	1.0675	1.07178	1.07219	1.07292	1.07828	1.09132	1.11341	1.11348	1.1057	1.11016	1.10256	1.10462	1.11527	1.10538	1.1131	1.11581	1.11649	1.10979	1.11036	1.10338	1.09908	1.09793	1.08533	1.08415	1.08366	1.0819	1.07289	1.07575	1.07748	1.06419	1.05441	1.05354	1.05097	1.05512	1.05339	1.04957	1.05472	1.0541	1.06186	1.05646
94	69	2	1.05094	1.04697	1.04658	1.04592	1.04369	1.04488	1.04301	1.04799	1.0457	1.0471	1.0561	1.05041	1.08711	1.09645	1.13636	1.14765	1.1351	1.10145	1.08255	1.05658	1.05421	1.05289	1.0816	1.07767	1.07076	1.07551	1.07916	1.06392	1.05768	1.06091	1.0518	1.05471	1.09183	1.07467	1.07411	1.05763	1.0507	1.0719	1.06558	1.06583	1.06555	1.07008	1.06402	1.06234	1.06508	1.0595	1.05632
95	70	2	1.06187	1.05677	1.05687	1.05723	1.06269	1.06045	1.05795	1.0561	1.05493	1.04978	1.04654	1.04512	1.04786	1.07486	1.11901	1.11514	1.0865	1.08351	1.06	1.06253	1.05873	1.05916	1.06275	1.05707	1.05939	1.05909	1.05749	1.05723	1.05892	1.06005	1.05892	1.05721	1.05888	1.06099	1.05568	1.0568	1.06715	1.05751	1.05256	1.05687	1.06104	1.06128	1.06332	1.05997	1.05921	1.05709	1.05141
96	71	2	1.06072	1.07292	1.06252	1.06862	1.05837	1.07131	1.07434	1.08519	1.08766	1.08595	1.08367	1.08884	1.09295	1.13926	1.15392	1.16957	1.13386	1.11319	1.11984	1.10609	1.10131	1.0972	1.09567	1.09495	1.08811	1.0831	1.08083	1.0795	1.07745	1.07441	1.0726	1.07337	1.07532	1.07454	1.07677	1.07226	1.07065	1.05346	1.06468	1.05566	1.05584	1.05268	1.05145	1.05639	1.05223	1.04746	1.04676
97	71	2	1.04791	1.05908	1.06626	1.04828	1.05838	1.06002	1.06141	1.06912	1.08557	1.0952	1.08369	1.09314	1.09695	1.13752	1.14733	1.14334	1.13764	1.13137	1.12368	1.11266	1.11179	1.10925	1.10691	1.09981	1.10194	1.09132	1.08936	1.09069	1.08695	1.0891	1.08064	1.08368	1.08392	1.07913	1.08013	1.07379	1.07605	1.05663	1.06063	1.08214	1.0549	1.05637	1.06243	1.06818	1.05184	1.05473	1.05258
98	72	2	1.04125	1.04102	1.04466	1.04211	1.04438	1.04326	1.04319	1.0433	1.04407	1.04345	1.04431	1.04439	1.05785	1.07709	1.10629	1.09798	1.09595	1.09021	1.08994	1.07941	1.05855	1.06978	1.06263	1.04865	1.05439	1.0487	1.05253	1.05297	1.05517	1.06185	1.0636	1.0598	1.06282	1.06372	1.05698	1.04637	1.06161	1.06409	1.05721	1.06432	1.07155	1.07739	1.06113	1.06457	1.05899	1.06088	1.05884
99	73	2	1.04253	1.04594	1.04958	1.04724	1.05125	1.06543	1.05177	1.04882	1.06294	1.05516	1.05358	1.05037	1.05742	1.08728	1.12703	1.11854	1.10614	1.09369	1.10966	1.0612	1.06978	1.0612	1.06414	1.07597	1.08657	1.06799	1.07194	1.0715	1.07337	1.07474	1.07618	1.07915	1.08339	1.08007	1.07637	1.08303	1.08171	1.05069	1.05283	1.05455	1.05345	1.05625	1.07658	1.08831	1.06255	1.06757	1.06013
100	74	2	1.06159	1.07381	1.06127	1.05862	1.07714	1.06671	1.07037	1.07677	1.07651	1.07816	1.07721	1.08811	1.07882	1.1421	1.1627	1.17714	1.15846	1.15263	1.13375	1.12589	1.09582	1.07479	1.06852	1.07779	1.06648	1.06198	1.06043	1.05437	1.06189	1.0564	1.05589	1.05436	1.05757	1.05709	1.05437	1.05522	1.04989	1.05635	1.05716	1.06725	1.05227	1.05808	1.0591	1.05997	1.07424	1.05156	1.04858
101	72	2	1.04587	1.04717	1.05337	1.04587	1.04975	1.04696	1.0476	1.04897	1.05569	1.04556	1.0499	1.05025	1.04839	1.07562	1.09824	1.10071	1.09412	1.06754	1.0613	1.05836	1.05483	1.05745	1.05346	1.05491	1.06486	1.05435	1.06449	1.07725	1.0657	1.07734	1.07782	1.06372	1.06746	1.07545	1.07536	1.05859	1.05531	1.0647	1.06209	1.07656	1.06649	1.07	1.06694	1.06404	1.06301	1.06926	1.06756
102	75	2	1.0541	1.05209	1.05038	1.05376	1.05	1.05827	1.05315	1.0718	1.06816	1.08098	1.08351	1.08426	1.08421	1.13807	1.14546	1.15455	1.14302	1.12308	1.11771	1.11003	1.10295	1.09854	1.08992	1.09083	1.08184	1.0823	1.07903	1.0794	1.07684	1.07543	1.07249	1.07693	1.07778	1.08081	1.07815	1.07124	1.07115	1.0523	1.05274	1.05174	1.05083	1.05125	1.05093	1.04902	1.05011	1.05024	1.05004
103	76	2	1.04308	1.04387	1.04444	1.04387	1.04549	1.05052	1.048	1.04572	1.0531	1.04988	1.04795	1.04924	1.05248	1.07037	1.07397	1.07791	1.08528	1.07682	1.07802	1.08208	1.06965	1.06122	1.07023	1.06111	1.0597	1.0605	1.06509	1.07029	1.07371	1.07618	1.08161	1.08882	1.09793	1.08953	1.08841	1.08683	1.08336	1.05314	1.05322	1.05281	1.05529	1.05638	1.05388	1.05134	1.0537	1.05049	1.05322
104	73	2	1.05642	1.05611	1.05648	1.05693	1.05173	1.05697	1.05246	1.05142	1.05089	1.04836	1.05282	1.05516	1.05762	1.09206	1.1222	1.09798	1.09862	1.08423	1.06371	1.05571	1.05931	1.05933	1.0598	1.06014	1.05855	1.07919	1.05792	1.06198	1.05697	1.06415	1.06179	1.06473	1.0643	1.05948	1.06594	1.06851	1.07257	1.06243	1.05626	1.05649	1.06663	1.05738	1.06491	1.07447	1.05592	1.06055	1.05364
105	77	2	1.04927	1.05031	1.04778	1.06087	1.06177	1.05784	1.06327	1.06692	1.07121	1.07272	1.07858	1.07922	1.08394	1.11758	1.13195	1.13322	1.12802	1.1156	1.11491	1.08095	1.09094	1.07311	1.07361	1.07573	1.07921	1.09903	1.07888	1.09946	1.09114	1.08175	1.09877	1.09328	1.11103	1.09853	1.09312	1.0858	1.10462	1.06167	1.06576	1.05951	1.06289	1.06784	1.0669	1.06349	1.06307	1.06239	1.06133
106	78	2	1.0586	1.06195	1.05573	1.05391	1.05305	1.05751	1.0579	1.05948	1.05742	1.06265	1.05307	1.05496	1.0532	1.12776	1.14205	1.13294	1.13263	1.08176	1.08693	1.06536	1.06137	1.05785	1.05566	1.06827	1.06752	1.05518	1.06384	1.05674	1.07542	1.05617	1.05442	1.0588	1.05747	1.05405	1.06161	1.0496	1.04891	1.0489	1.04593	1.04626	1.04555	1.04677	1.04485	1.04353	1.04586	1.04729	1.04862
107	77	2	1.04201	1.0437	1.04335	1.04184	1.04589	1.04427	1.04551	1.04821	1.04776	1.04999	1.04728	1.05254	1.05406	1.09228	1.10328	1.08967	1.0837	1.07875	1.08859	1.09155	1.09263	1.09593	1.09048	1.08481	1.09286	1.0938	1.08845	1.09436	1.09519	1.09128	1.09176	1.0832	1.09232	1.08362	1.07864	1.07774	1.07966	1.06478	1.06927	1.06835	1.06916	1.06275	1.06533	1.06435	1.06214	1.0629	1.05709
108	79	2	1.05314	1.05026	1.05293	1.04962	1.04829	1.04897	1.05351	1.05716	1.06804	1.05011	1.04594	1.04712	1.05252	1.10874	1.16448	1.16401	1.1465	1.12194	1.10805	1.06982	1.05069	1.05628	1.05211	1.04864	1.04646	1.05482	1.04991	1.04725	1.05372	1.04969	1.06937	1.0479	1.05514	1.05878	1.05745	1.05523	1.04478	1.03854	1.03779	1.03824	1.04153	1.04008	1.03964	1.04041	1.04046	1.039	1.03934
109	80	2	1.04295	1.0403	1.03834	1.03888	1.03968	1.04188	1.04504	1.04556	1.04708	1.05222	1.05571	1.06115	1.06706	1.10319	1.10329	1.09368	1.08868	1.09558	1.09043	1.08396	1.09223	1.08858	1.08518	1.08597	1.07765	1.07434	1.0773	1.0691	1.06386	1.06449	1.0632	1.06151	1.06643	1.05969	1.05551	1.05052	1.04906	1.05914	1.06051	1.06329	1.06531	1.06467	1.0623	1.06116	1.07197	1.06132	1.05906
110	80	2	1.03682	1.03678	1.03833	1.03669	1.03726	1.04117	1.04715	1.0389	1.04036	1.04061	1.04099	1.04505	1.04395	1.07259	1.08168	1.08512	1.07795	1.0806	1.07187	1.06842	1.06472	1.06263	1.06935	1.0735	1.06809	1.059	1.07659	1.06953	1.07206	1.07872	1.07392	1.07152	1.08127	1.06415	1.07858	1.06825	1.05408	1.05599	1.05425	1.05584	1.05855	1.0557	1.06068	1.07068	1.05309	1.05166	1.0481
111	81	2	1.04016	1.03794	1.03791	1.03747	1.03588	1.03929	1.04641	1.04253	1.04481	1.05135	1.05064	1.05614	1.06986	1.09506	1.09487	1.08568	1.08332	1.08164	1.09259	1.0818	1.08344	1.08107	1.07893	1.07652	1.07188	1.07274	1.06918	1.06831	1.05675	1.0596	1.05534	1.05816	1.06247	1.05597	1.05107	1.04926	1.04583	1.05939	1.05626	1.06008	1.06089	1.05845	1.05745	1.05929	1.06396	1.05494	1.05451
112	82	2	1.05099	1.05402	1.05064	1.05275	1.05266	1.05279	1.0537	1.06264	1.06041	1.07101	1.06641	1.06721	1.07327	1.10877	1.13839	1.142	1.11259	1.11062	1.10594	1.10475	1.11105	1.11033	1.10686	1.10196	1.08946	1.0918	1.09069	1.08748	1.08217	1.08189	1.07549	1.07708	1.0758	1.07128	1.06659	1.0668	1.05968	1.05575	1.05829	1.05867	1.05732	1.05667	1.05737	1.05645	1.05801	1.05619	1.06815
113	81	2	1.03448	1.03519	1.03572	1.03533	1.0355	1.04224	1.04006	1.03696	1.03692	1.03906	1.03796	1.04241	1.04476	1.07601	1.08043	1.07596	1.07633	1.06643	1.08265	1.06812	1.06163	1.05695	1.06795	1.0692	1.06238	1.05913	1.07536	1.07135	1.07035	1.07641	1.07209	1.06557	1.06952	1.06845	1.05856	1.05918	1.05349	1.0487	1.0495	1.04911	1.05296	1.05025	1.05958	1.0644	1.04802	1.04718	1.04449
114	83	2	1.04556	1.04248	1.04323	1.04656	1.05217	1.04821	1.05435	1.05537	1.04932	1.05129	1.05226	1.05851	1.04679	1.07252	1.0751	1.0799	1.06539	1.06629	1.07697	1.06796	1.06872	1.06249	1.04509	1.04698	1.04893	1.05116	1.04585	1.0473	1.0477	1.04497	1.04756	1.04671	1.0483	1.04689	1.04901	1.04902	1.04792	1.05047	1.05406	1.05217	1.05404	1.05504	1.05695	1.05332	1.05215	1.05261	1.0511
115	84	2	1.04582	1.04493	1.0443	1.04631	1.04508	1.04743	1.04997	1.05393	1.05293	1.05285	1.05026	1.05289	1.05336	1.09393	1.10454	1.11607	1.09012	1.07483	1.06532	1.06445	1.06936	1.06961	1.06513	1.06436	1.07164	1.06886	1.07254	1.07116	1.07822	1.07719	1.06966	1.07448	1.07633	1.07798	1.08777	1.07658	1.07176	1.05197	1.05433	1.05075	1.05214	1.05452	1.05713	1.05503	1.05672	1.05411	1.05229
116	85	2	1.05928	1.06308	1.05741	1.06489	1.0632	1.05108	1.05936	1.06584	1.0594	1.06217	1.06547	1.06717	1.06126	1.10876	1.11407	1.11184	1.10853	1.1094	1.08781	1.09055	1.10694	1.0799	1.08748	1.07501	1.0833	1.0748	1.08594	1.06971	1.06454	1.06562	1.07089	1.06633	1.06326	1.06678	1.06931	1.06678	1.06777	1.06409	1.06266	1.06279	1.05922	1.0613	1.06379	1.07068	1.05835	1.05592	1.05669
117	86	2	1.04029	1.04514	1.04269	1.04652	1.04796	1.0488	1.04212	1.04098	1.0434	1.05517	1.04223	1.04337	1.05475	1.11248	1.14176	1.13987	1.13047	1.09259	1.04985	1.04593	1.04613	1.04581	1.04532	1.04566	1.04762	1.0479	1.0474	1.0544	1.04619	1.04753	1.07867	1.12797	1.10393	1.05487	1.07847	1.0521	1.11295	1.05	1.06124	1.05861	1.07004	1.06918	1.06097	1.04977	1.04996	1.04963	1.05685
118	87	2	1.04522	1.04676	1.04863	1.04867	1.04958	1.04592	1.0517	1.06052	1.06592	1.07854	1.06682	1.06273	1.06172	1.10809	1.11785	1.10396	1.09578	1.07862	1.07239	1.06543	1.067	1.06569	1.06577	1.0671	1.0662	1.06896	1.06328	1.06388	1.06346	1.06631	1.06763	1.06308	1.06407	1.05791	1.05914	1.05956	1.06037	1.05732	1.05365	1.06046	1.07558	1.07089	1.06187	1.06083	1.06525	1.07492	1.08898
119	87	2	1.04125	1.0393	1.03781	1.03637	1.03917	1.04029	1.04212	1.04139	1.043	1.04226	1.04194	1.04504	1.05481	1.07312	1.07567	1.08396	1.0902	1.08302	1.05226	1.05191	1.05127	1.05126	1.05049	1.04961	1.0536	1.05143	1.05333	1.05919	1.06469	1.07519	1.07639	1.07917	1.07516	1.06972	1.07209	1.07389	1.07067	1.05171	1.04996	1.05063	1.05144	1.05196	1.05481	1.05152	1.04829	1.04813	1.04958
120	88	2	1.04041	1.04246	1.04446	1.0458	1.04183	1.04206	1.04424	1.04469	1.04473	1.04617	1.04567	1.04594	1.05299	1.10076	1.10271	1.08167	1.10286	1.07366	1.07114	1.06506	1.06414	1.06108	1.05933	1.0632	1.06473	1.067	1.06636	1.07289	1.07177	1.08055	1.08037	1.08184	1.0791	1.07958	1.08781	1.08189	1.07941	1.04592	1.04789	1.04679	1.04591	1.04658	1.04635	1.04703	1.049	1.05007	1.04649
121	86	2	1.05015	1.07427	1.04534	1.04868	1.04772	1.04876	1.04202	1.04252	1.04692	1.0456	1.04352	1.0458	1.0525	1.12007	1.13428	1.14585	1.13368	1.09477	1.05412	1.04839	1.0495	1.04882	1.04865	1.04677	1.04843	1.04835	1.05877	1.05062	1.04524	1.04533	1.09158	1.04807	1.05462	1.05992	1.06064	1.08943	1.0754	1.0731	1.10898	1.07451	1.07219	1.06889	1.05513	1.04412	1.043	1.04567	1.04494
122	89	2	1.08244	1.07993	1.07073	1.07019	1.06942	1.06912	1.06534	1.07111	1.06276	1.06322	1.05581	1.06507	1.06162	1.13928	1.1495	1.14681	1.14207	1.14058	1.15356	1.12628	1.11624	1.079	1.05484	1.05528	1.05044	1.05324	1.06344	1.0601	1.0655	1.05732	1.05265	1.0532	1.07653	1.06418	1.05658	1.0825	1.07922	1.06126	1.05858	1.06108	1.06099	1.05802	1.05655	1.05472	1.05734	1.05496	1.05227
123	90	2	1.0524	1.04599	1.04625	1.05005	1.04669	1.0456	1.04118	1.044	1.04633	1.04742	1.04554	1.04829	1.05093	1.13429	1.12977	1.14047	1.11926	1.07058	1.05602	1.06716	1.0458	1.04582	1.04539	1.04476	1.044	1.06418	1.05905	1.04596	1.04118	1.04389	1.0494	1.05429	1.04884	1.05747	1.0468	1.06569	1.08249	1.04104	1.04474	1.04047	1.04106	1.03662	1.03907	1.03709	1.03625	1.03648	1.0356
124	91	2	1.0406	1.04284	1.04656	1.05126	1.05039	1.04633	1.04971	1.05103	1.05163	1.05053	1.051	1.04924	1.05165	1.10096	1.11798	1.09523	1.08014	1.0606	1.06634	1.05513	1.05988	1.04916	1.05139	1.04779	1.05048	1.04968	1.04459	1.04134	1.04131	1.04101	1.04053	1.04259	1.04231	1.04655	1.04357	1.04291	1.04447	1.04037	1.04173	1.04519	1.04478	1.04513	1.0456	1.04655	1.04738	1.04765	1.04604
125	92	2	1.04416	1.0459	1.06277	1.04889	1.04766	1.04991	1.04879	1.04941	1.05309	1.05867	1.05645	1.05761	1.0712	1.10899	1.10219	1.10899	1.10024	1.10301	1.09314	1.09119	1.11063	1.10765	1.1014	1.09641	1.07877	1.10698	1.08294	1.09598	1.09653	1.11102	1.104	1.10473	1.10676	1.11185	1.10989	1.1235	1.11279	1.04889	1.05083	1.05832	1.05816	1.06164	1.05837	1.0544	1.05545	1.05045	1.05013
126	93	2	1.0656	1.0633	1.06347	1.06364	1.05721	1.06264	1.05859	1.05999	1.06943	1.06439	1.06196	1.0691	1.08286	1.10483	1.12435	1.11256	1.10302	1.09329	1.07981	1.07634	1.07772	1.07661	1.0836	1.0918	1.08666	1.09131	1.08854	1.07664	1.07388	1.08134	1.07413	1.06696	1.0663	1.07443	1.07465	1.07609	1.07781	1.0461	1.0466	1.04623	1.06184	1.05035	1.05082	1.04763	1.04934	1.05629	1.05129
127	94	2	1.04549	1.04556	1.04713	1.04835	1.05152	1.05176	1.0501	1.05354	1.0578	1.06476	1.05958	1.06834	1.07994	1.10906	1.11407	1.08603	1.11326	1.11175	1.09039	1.08255	1.08066	1.08206	1.08232	1.07943	1.08699	1.09024	1.08772	1.08938	1.09245	1.0939	1.09358	1.09912	1.09615	1.095	1.09664	1.09388	1.08979	1.0548	1.05202	1.05572	1.05501	1.05667	1.056	1.05503	1.05665	1.05673	1.05675
128	91	2	1.05354	1.05641	1.05717	1.061	1.06648	1.06279	1.0564	1.05301	1.05328	1.05418	1.04793	1.04683	1.05813	1.11046	1.11254	1.09511	1.09924	1.08933	1.06415	1.04911	1.04805	1.05983	1.06594	1.04968	1.05347	1.05585	1.04659	1.04532	1.04628	1.05299	1.04899	1.04988	1.04525	1.05044	1.04706	1.04681	1.04775	1.0387	1.03932	1.04308	1.04065	1.04346	1.04405	1.04314	1.04422	1.04389	1.04333
129	95	2	1.03791	1.03643	1.03774	1.03695	1.03751	1.03805	1.03618	1.04082	1.04362	1.04335	1.05095	1.0546	1.07028	1.08804	1.08881	1.08205	1.08294	1.08258	1.08411	1.08188	1.08731	1.08775	1.08644	1.08909	1.09236	1.08696	1.0895	1.10198	1.09018	1.09666	1.09635	1.10345	1.10492	1.11466	1.11112	1.11005	1.1136	1.05848	1.05432	1.05476	1.05831	1.0562	1.05761	1.05587	1.05523	1.05729	1.05863
130	96	2	1.04168	1.04152	1.04309	1.04671	1.04803	1.04871	1.05256	1.05164	1.04953	1.04968	1.05115	1.05377	1.06445	1.11521	1.11374	1.08723	1.08038	1.07545	1.05954	1.05363	1.05495	1.05205	1.04984	1.04883	1.05386	1.04927	1.04754	1.05101	1.04999	1.05135	1.05268	1.05667	1.05604	1.05312	1.06032	1.07602	1.0524	1.06302	1.05994	1.06024	1.06064	1.05689	1.058	1.05857	1.05335	1.05201	1.04958
131	97	2	1.04545	1.04579	1.04472	1.04661	1.05046	1.05519	1.05733	1.05023	1.05015	1.04813	1.05183	1.05318	1.07164	1.10672	1.11993	1.12271	1.10355	1.09826	1.0896	1.07366	1.06556	1.0654	1.06262	1.06661	1.05682	1.05955	1.06309	1.07496	1.06361	1.07007	1.07261	1.07493	1.07426	1.06873	1.07922	1.06892	1.0628	1.05818	1.06106	1.05865	1.05969	1.06047	1.0557	1.05895	1.05928	1.05604	1.0525
132	98	2	1.04445	1.04388	1.04171	1.04729	1.04316	1.06129	1.05412	1.04784	1.04759	1.05505	1.05945	1.06495	1.07775	1.1055	1.10978	1.12675	1.10785	1.1112	1.09266	1.07742	1.07765	1.07387	1.07389	1.07325	1.07279	1.06933	1.07658	1.07908	1.07902	1.09246	1.09894	1.11328	1.09662	1.10279	1.09687	1.10735	1.09603	1.05871	1.0573	1.05817	1.06287	1.0592	1.06164	1.09906	1.06275	1.05557	1.05806
133	99	2	1.04624	1.04455	1.04443	1.05114	1.0438	1.04438	1.04245	1.04465	1.04233	1.04259	1.04379	1.04519	1.06304	1.12067	1.09897	1.12645	1.0758	1.10856	1.07452	1.08244	1.07202	1.04814	1.05057	1.06234	1.06825	1.05024	1.05237	1.05726	1.06256	1.04557	1.04742	1.05082	1.04529	1.04883	1.04956	1.05104	1.04827	1.039	1.03989	1.03927	1.0379	1.03855	1.03699	1.03612	1.03552	1.03711	1.03719
134	97	2	1.05179	1.05286	1.04935	1.06788	1.05501	1.04692	1.04862	1.05204	1.05221	1.0559	1.05389	1.05994	1.07181	1.12561	1.13546	1.12698	1.10595	1.09766	1.08055	1.06924	1.07942	1.07185	1.09054	1.07657	1.08055	1.08065	1.08212	1.08656	1.08982	1.09005	1.0888	1.08774	1.08495	1.0815	1.08875	1.09392	1.08814	1.06635	1.06649	1.06546	1.06661	1.08606	1.08563	1.05909	1.06132	1.06115	1.05675
135	100	2	1.04959	1.04664	1.04822	1.04632	1.0461	1.04944	1.05008	1.05341	1.05311	1.05292	1.05589	1.05727	1.07105	1.11463	1.12638	1.10545	1.10148	1.09879	1.07929	1.09188	1.05787	1.05469	1.05211	1.05362	1.05228	1.05547	1.05576	1.05686	1.05112	1.05428	1.05735	1.05454	1.05573	1.05902	1.05838	1.06126	1.0587	1.05959	1.05279	1.05547	1.05578	1.05286	1.05313	1.05174	1.04782	1.05258	1.05554
136	101	2	1.04533	1.04227	1.04229	1.04517	1.04119	1.04268	1.04262	1.04003	1.04214	1.04244	1.04102	1.04352	1.05423	1.10634	1.1078	1.1018	1.0888	1.05561	1.05367	1.0556	1.05375	1.06649	1.05443	1.05008	1.05251	1.05155	1.05502	1.05437	1.05219	1.06819	1.05807	1.06529	1.05934	1.06461	1.063	1.0733	1.06899	1.05571	1.05476	1.05266	1.05282	1.05064	1.04847	1.04729	1.04774	1.04931	1.04818
137	102	2	1.067	1.07597	1.07614	1.07641	1.08864	1.08558	1.08784	1.08651	1.09185	1.10311	1.10971	1.11416	1.14961	1.18264	1.19347	1.17296	1.14364	1.151	1.16213	1.15478	1.15004	1.15299	1.14046	1.1517	1.13605	1.13435	1.12841	1.12515	1.12658	1.13056	1.12254	1.1186	1.12088	1.12121	1.10277	1.10747	1.09693	1.06867	1.06706	1.07877	1.06378	1.06797	1.06782	1.06239	1.07398	1.06497	1.0702
138	103	2	1.05087	1.05392	1.05346	1.05337	1.05561	1.05101	1.04828	1.04557	1.04819	1.04716	1.04684	1.04516	1.05347	1.08692	1.09329	1.07176	1.0705	1.05555	1.05269	1.05516	1.05241	1.05694	1.05671	1.06073	1.05851	1.06086	1.06374	1.06719	1.06606	1.07616	1.07338	1.08515	1.08414	1.0943	1.08896	1.09081	1.07971	1.05434	1.05526	1.05799	1.05717	1.04983	1.05255	1.056	1.05334	1.05446	1.05114
139	104	2	1.0484	1.04797	1.05098	1.04686	1.04518	1.05257	1.05417	1.06842	1.0543	1.05722	1.04458	1.04915	1.06197	1.10601	1.11197	1.11373	1.07461	1.06715	1.05159	1.06483	1.04915	1.0482	1.0453	1.04806	1.04957	1.04454	1.04289	1.05315	1.04516	1.05025	1.0515	1.05333	1.04452	1.04947	1.04516	1.05522	1.04652	1.04825	1.04854	1.0522	1.04702	1.04696	1.04506	1.04873	1.05939	1.06591	1.05947
140	105	2	1.05406	1.05033	1.05304	1.05152	1.05052	1.05308	1.05015	1.05515	1.05357	1.0624	1.05582	1.05762	1.07057	1.16475	1.16853	1.1716	1.14968	1.06131	1.05111	1.05042	1.05339	1.06743	1.05203	1.05517	1.06792	1.0482	1.05077	1.05493	1.05341	1.07092	1.05204	1.05005	1.06534	1.05383	1.05416	1.05341	1.05084	1.04523	1.04093	1.04375	1.04302	1.04315	1.04055	1.04055	1.0404	1.04246	1.04096
141	106	3	1.0663	1.06297	1.06415	1.05731	1.06071	1.05212	1.04889	1.05649	1.05623	1.05541	1.05568	1.05704	1.05519	1.09114	1.11353	1.11309	1.10613	1.10869	1.12632	1.08409	1.07586	1.07229	1.08114	1.09516	1.09036	1.06368	1.07676	1.08266	1.08507	1.10038	1.10516	1.10087	1.11141	1.12264	1.12264	1.12298	1.1253	1.05693	1.05449	1.05446	1.0553	1.06019	1.0571	1.05808	1.05881	1.0582	1.05394
142	107	3	1.05896	1.06336	1.06418	1.06025	1.056	1.06099	1.05197	1.05791	1.05641	1.05776	1.06025	1.05306	1.05177	1.10601	1.14391	1.14883	1.1309	1.11006	1.08264	1.06347	1.06158	1.06333	1.05854	1.05685	1.06213	1.06487	1.05567	1.05575	1.05455	1.05934	1.06014	1.0599	1.06384	1.06475	1.0611	1.06662	1.06283	1.06471	1.08354	1.09735	1.08489	1.09202	1.09749	1.07591	1.06001	1.06231	1.06223
143	108	3	1.04123	1.04137	1.04536	1.04491	1.04446	1.05112	1.04599	1.05679	1.04918	1.045	1.0563	1.05556	1.04655	1.06815	1.0887	1.09642	1.09712	1.09281	1.09526	1.08486	1.08434	1.05297	1.04887	1.05449	1.0538	1.04877	1.05143	1.05206	1.05186	1.05525	1.05548	1.05324	1.05523	1.05185	1.05161	1.05164	1.04835	1.06333	1.06568	1.06569	1.06897	1.06987	1.07307	1.06878	1.08765	1.06846	1.06533
144	109	3	1.04454	1.04234	1.04555	1.04177	1.04459	1.04369	1.03809	1.04037	1.04353	1.03995	1.04235	1.04408	1.04266	1.08601	1.10352	1.0922	1.07655	1.08855	1.09205	1.06187	1.07311	1.04527	1.04472	1.04754	1.04163	1.04066	1.05232	1.04476	1.05773	1.04362	1.04725	1.05092	1.04902	1.04575	1.04575	1.05009	1.04721	1.05075	1.0528	1.05082	1.04943	1.04841	1.04881	1.0438	1.04896	1.04821	1.0471
145	110	3	1.05855	1.06596	1.06166	1.07065	1.07916	1.07487	1.05692	1.07832	1.08119	1.07651	1.08077	1.07394	1.08013	1.11136	1.12875	1.13547	1.13166	1.1371	1.13737	1.13684	1.10575	1.10266	1.08265	1.08226	1.08486	1.06889	1.07154	1.06999	1.07313	1.07645	1.07212	1.07131	1.07217	1.06921	1.06938	1.07382	1.07171	1.07352	1.10807	1.12796	1.12508	1.13868	1.11324	1.06494	1.06561	1.06162	1.05956
146	111	3	1.05081	1.05526	1.05954	1.05697	1.05794	1.06173	1.05491	1.06132	1.06708	1.07287	1.07772	1.08076	1.09297	1.13503	1.12398	1.13628	1.12526	1.11784	1.12173	1.09244	1.0907	1.08077	1.08837	1.08248	1.07766	1.06034	1.07689	1.06922	1.07862	1.07674	1.06978	1.08083	1.0832	1.07639	1.07141	1.07916	1.07633	1.08668	1.08391	1.08596	1.08045	1.06793	1.06755	1.07738	1.07623	1.08265	1.0669
147	108	3	1.05905	1.05106	1.05023	1.04803	1.04664	1.04963	1.04802	1.05323	1.05134	1.04694	1.051	1.04891	1.04864	1.08223	1.10455	1.10489	1.10418	1.10177	1.09491	1.06752	1.08518	1.07845	1.07299	1.06945	1.05916	1.08036	1.06798	1.08861	1.07412	1.06687	1.05293	1.06038	1.0543	1.06781	1.0681	1.07475	1.05759	1.07377	1.08015	1.07262	1.06604	1.0653	1.06238	1.06544	1.06131	1.06447	1.06051
148	112	3	1.04522	1.04418	1.0428	1.04411	1.04291	1.0406	1.04172	1.04228	1.03801	1.04018	1.04031	1.04652	1.04445	1.07846	1.10136	1.10545	1.09517	1.08164	1.09211	1.04886	1.04332	1.04233	1.05501	1.04194	1.04382	1.0393	1.04408	1.04546	1.04534	1.08394	1.04651	1.05665	1.05978	1.08597	1.04702	1.04946	1.04936	1.05924	1.05784	1.05671	1.05481	1.0534	1.05444	1.05394	1.05535	1.04508	1.05342
149	113	3	1.05101	1.05261	1.05302	1.05395	1.05689	1.06249	1.06408	1.06854	1.06664	1.0727	1.06902	1.07715	1.06903	1.10257	1.10625	1.11451	1.09559	1.10605	1.09746	1.10079	1.12329	1.10059	1.08947	1.0825	1.09746	1.08394	1.08691	1.08175	1.08475	1.0853	1.08923	1.08702	1.08785	1.08452	1.08098	1.08005	1.08446	1.06126	1.06389	1.06169	1.06256	1.06229	1.05694	1.05951	1.06813	1.05868	1.0649
150	114	3	1.04846	1.05478	1.05669	1.0547	1.05769	1.0668	1.06838	1.07004	1.0672	1.06612	1.06901	1.06286	1.05505	1.09966	1.10511	1.13022	1.11994	1.11177	1.11309	1.08878	1.06982	1.06705	1.05785	1.05686	1.05612	1.05604	1.05822	1.06141	1.05689	1.05464	1.05614	1.05528	1.05772	1.05637	1.05248	1.05821	1.0537	1.08714	1.08216	1.07669	1.07303	1.07535	1.09087	1.12698	1.12297	1.1021	1.11175
151	115	3	1.05013	1.04947	1.04822	1.04525	1.0456	1.04414	1.04425	1.04394	1.04335	1.04557	1.0421	1.04172	1.04718	1.08957	1.09678	1.0912	1.08309	1.09104	1.07108	1.05181	1.05052	1.04947	1.04726	1.04935	1.05513	1.04731	1.04556	1.04912	1.04795	1.04503	1.04405	1.04662	1.04508	1.04746	1.05013	1.05188	1.05663	1.06444	1.07823	1.12032	1.06767	1.05851	1.05583	1.05908	1.06007	1.05783	1.05544
152	116	3	1.04947	1.04573	1.04443	1.04743	1.05106	1.04335	1.04278	1.04547	1.04684	1.04559	1.04642	1.0452	1.04363	1.07973	1.10995	1.09961	1.09662	1.11068	1.0833	1.05944	1.05797	1.05557	1.05842	1.05596	1.05646	1.05519	1.05758	1.0559	1.06067	1.05966	1.06689	1.06576	1.06574	1.06601	1.06416	1.06163	1.06266	1.06841	1.072	1.06724	1.0652	1.0915	1.06903	1.07626	1.07442	1.06112	1.05114
153	117	3	1.05651	1.06095	1.05481	1.05594	1.05772	1.06105	1.06312	1.06263	1.06486	1.05854	1.05479	1.05098	1.05325	1.08903	1.11227	1.10205	1.08319	1.10861	1.08082	1.05245	1.05472	1.0511	1.05314	1.055	1.04964	1.0494	1.05147	1.04931	1.07296	1.04961	1.05469	1.05171	1.05878	1.05617	1.05335	1.05175	1.05783	1.06768	1.06845	1.06342	1.05855	1.06406	1.07445	1.06918	1.06634	1.07595	1.06157
154	118	3	1.06609	1.06123	1.06235	1.07996	1.0637	1.06444	1.06846	1.0722	1.07819	1.07499	1.07749	1.07635	1.075	1.12488	1.13816	1.13202	1.12525	1.1169	1.11526	1.10275	1.09379	1.0941	1.08893	1.09131	1.08808	1.09278	1.08607	1.08647	1.09389	1.0994	1.09756	1.11484	1.10198	1.10597	1.10414	1.10116	1.10378	1.12947	1.10523	1.09606	1.1279	1.12518	1.11079	1.07479	1.07013	1.0752	1.06228
155	117	3	1.05131	1.0514	1.04714	1.04696	1.05686	1.05227	1.05516	1.05482	1.05419	1.05377	1.05093	1.05097	1.04992	1.08887	1.11046	1.10933	1.10352	1.08589	1.06699	1.05824	1.0584	1.05808	1.0565	1.05529	1.05555	1.04934	1.05008	1.05148	1.06518	1.06096	1.07657	1.0645	1.07279	1.05102	1.06159	1.05548	1.05512	1.07116	1.06946	1.07296	1.07197	1.08495	1.06864	1.09099	1.09144	1.07767	1.06421
156	119	3	1.05061	1.05023	1.04488	1.05023	1.05471	1.05434	1.05817	1.04917	1.0472	1.05559	1.04998	1.04813	1.04864	1.07396	1.1035	1.09898	1.10292	1.10346	1.0883	1.09051	1.05655	1.05701	1.05349	1.07556	1.05964	1.05676	1.06837	1.06729	1.09	1.07796	1.08493	1.06613	1.09831	1.09227	1.09077	1.08116	1.07246	1.06052	1.06012	1.05846	1.06071	1.06328	1.06006	1.06238	1.06727	1.05741	1.05805
157	120	3	1.06264	1.0827	1.08064	1.06628	1.06368	1.06844	1.07206	1.06559	1.0566	1.0545	1.06563	1.05076	1.05006	1.09365	1.12438	1.11771	1.11869	1.08069	1.05993	1.05821	1.05427	1.05427	1.05426	1.05556	1.05263	1.05656	1.06149	1.05344	1.06216	1.0629	1.05978	1.05934	1.06426	1.06972	1.06616	1.06995	1.0714	1.08458	1.09033	1.12922	1.10398	1.07282	1.09824	1.11022	1.10356	1.06356	1.06104
158	120	3	1.04773	1.05007	1.05427	1.0568	1.0539	1.05411	1.05569	1.05536	1.05194	1.05488	1.0582	1.05181	1.06129	1.10616	1.10763	1.11676	1.12058	1.13134	1.10634	1.06954	1.07299	1.06365	1.05909	1.05726	1.06605	1.06683	1.07529	1.05873	1.0608	1.06818	1.06663	1.05586	1.07786	1.09424	1.10939	1.11205	1.0838	1.06109	1.06176	1.06397	1.06884	1.06611	1.0667	1.06679	1.08106	1.07019	1.06186
159	121	3	1.0591	1.06738	1.06311	1.06855	1.06149	1.05656	1.05908	1.05745	1.05953	1.05961	1.05893	1.05948	1.06043	1.12266	1.15012	1.14576	1.12652	1.11071	1.08736	1.06222	1.06187	1.06276	1.06599	1.06153	1.05855	1.05899	1.06106	1.06728	1.05846	1.05828	1.05889	1.07208	1.05949	1.08923	1.08583	1.06445	1.05887	1.07247	1.0676	1.0823	1.10252	1.11763	1.06424	1.06257	1.06194	1.05927	1.06346
160	119	3	1.05614	1.05044	1.05026	1.05344	1.07175	1.05759	1.0597	1.05174	1.04901	1.05276	1.05055	1.05109	1.052	1.09203	1.10165	1.09861	1.09906	1.09312	1.08781	1.07814	1.07859	1.07234	1.05324	1.06525	1.06044	1.05156	1.05187	1.06185	1.05273	1.0592	1.07756	1.07128	1.05618	1.0571	1.05494	1.05603	1.06107	1.06238	1.07092	1.06085	1.06546	1.08897	1.09548	1.08767	1.08615	1.0689	1.06186
161	118	3	1.05543	1.05372	1.04932	1.0589	1.05395	1.05152	1.05442	1.05494	1.05842	1.05416	1.06074	1.05608	1.05994	1.09219	1.11255	1.11571	1.10765	1.10909	1.11421	1.10504	1.08561	1.09684	1.09466	1.0935	1.0944	1.08468	1.0721	1.08402	1.08012	1.08871	1.08858	1.09932	1.1001	1.09808	1.092	1.0993	1.10224	1.0886	1.07122	1.07207	1.08213	1.08532	1.08059	1.06804	1.07474	1.07898	1.08376
162	122	3	1.04469	1.04612	1.04365	1.04531	1.04609	1.04451	1.04344	1.04643	1.04644	1.04915	1.05826	1.04979	1.04636	1.10187	1.13322	1.13943	1.10958	1.10585	1.1014	1.06528	1.06386	1.06137	1.05512	1.0537	1.05623	1.05317	1.05357	1.07243	1.0633	1.06855	1.06497	1.08886	1.05963	1.05589	1.05304	1.0542	1.06416	1.07605	1.0771	1.06909	1.0662	1.07113	1.07177	1.06944	1.06572	1.06676	1.07142
163	123	3	1.1005	1.07287	1.05772	1.05719	1.05812	1.06298	1.05721	1.05898	1.05669	1.05821	1.05694	1.05806	1.05952	1.1131	1.13669	1.14008	1.14517	1.13293	1.11487	1.11113	1.0915	1.07859	1.06329	1.06242	1.06597	1.06527	1.06457	1.08457	1.07765	1.08709	1.06314	1.05719	1.05974	1.06654	1.07154	1.06065	1.06188	1.08754	1.11367	1.07913	1.05827	1.05649	1.05399	1.05968	1.05409	1.05151	1.05103
164	124	3	1.05667	1.0528	1.05928	1.05549	1.05396	1.05258	1.05881	1.06	1.06871	1.07051	1.06167	1.0649	1.06354	1.09742	1.11943	1.10467	1.09546	1.09952	1.09876	1.0765	1.07285	1.07081	1.06761	1.06595	1.06504	1.06323	1.06479	1.0668	1.06678	1.06737	1.06833	1.06922	1.07476	1.07594	1.0747	1.07499	1.08287	1.07716	1.07473	1.0736	1.07444	1.08023	1.07308	1.07787	1.07698	1.07264	1.08952
165	125	3	1.0765	1.09031	1.07685	1.07864	1.08171	1.06434	1.05559	1.05487	1.05461	1.05507	1.04786	1.05616	1.05058	1.10119	1.10607	1.09676	1.08596	1.09047	1.07335	1.07544	1.05742	1.05407	1.05186	1.05124	1.0557	1.05753	1.05537	1.05663	1.05264	1.05789	1.05984	1.05878	1.05849	1.05949	1.05795	1.05694	1.06011	1.06861	1.0707	1.06815	1.0689	1.06531	1.06297	1.06006	1.05868	1.06467	1.05847
166	123	3	1.05197	1.05663	1.05865	1.05397	1.05716	1.0562	1.05799	1.05436	1.0561	1.06621	1.08046	1.07429	1.08957	1.10506	1.12312	1.12837	1.12259	1.11867	1.11803	1.11061	1.09868	1.08692	1.06423	1.06735	1.06842	1.06895	1.07208	1.07496	1.07366	1.0781	1.07849	1.07741	1.07999	1.08243	1.0836	1.08066	1.08172	1.06579	1.06297	1.06412	1.06017	1.05967	1.06048	1.06542	1.06206	1.06495	1.06967
167	126	3	1.05472	1.05293	1.04958	1.04913	1.04961	1.05158	1.04985	1.04723	1.04898	1.05955	1.06059	1.04629	1.05861	1.11372	1.13566	1.16741	1.16307	1.17863	1.15009	1.09998	1.05603	1.04917	1.04799	1.04846	1.04674	1.04974	1.04874	1.05097	1.0543	1.05149	1.04944	1.04877	1.04851	1.05081	1.04953	1.05609	1.06002	1.04757	1.04477	1.04627	1.04348	1.04373	1.0454	1.0441	1.04576	1.04427	1.04517
168	127	3	1.04717	1.04358	1.04227	1.04282	1.04285	1.04254	1.04162	1.04637	1.04725	1.0502	1.04719	1.04597	1.05516	1.08465	1.11215	1.10331	1.07271	1.08517	1.0726	1.08101	1.06173	1.0631	1.04751	1.04603	1.04685	1.04946	1.05692	1.08591	1.10938	1.1059	1.09789	1.10195	1.11027	1.07293	1.09773	1.11491	1.1149	1.05825	1.05815	1.05742	1.05795	1.06162	1.06281	1.05928	1.06003	1.06156	1.07856
169	128	3	1.07187	1.06433	1.06461	1.06655	1.05942	1.05995	1.05884	1.05768	1.0602	1.05416	1.05603	1.05684	1.07019	1.10169	1.11984	1.11405	1.11646	1.09428	1.0885	1.06513	1.06254	1.0529	1.05603	1.0529	1.06311	1.05631	1.05684	1.05545	1.05302	1.05722	1.05802	1.06163	1.05829	1.06447	1.06568	1.06663	1.0665	1.07894	1.06195	1.06157	1.05825	1.0582	1.05646	1.05858	1.05705	1.05736	1.05737
170	129	3	1.05395	1.05969	1.05946	1.06473	1.07074	1.07187	1.07716	1.0714	1.08326	1.07655	1.07681	1.07599	1.09518	1.10857	1.11389	1.11741	1.09724	1.08414	1.0764	1.07686	1.07294	1.07334	1.06357	1.06279	1.06236	1.05514	1.05443	1.05488	1.05285	1.0559	1.05354	1.05196	1.052	1.05645	1.0539	1.05562	1.05933	1.07484	1.07509	1.05687	1.07087	1.06924	1.0687	1.10221	1.15098	1.06899	1.06746
171	130	3	1.05887	1.05523	1.05287	1.05203	1.05396	1.05403	1.05235	1.05135	1.05192	1.0481	1.0462	1.05117	1.07361	1.11082	1.14036	1.12419	1.11713	1.0878	1.0575	1.0533	1.05511	1.0537	1.05326	1.05226	1.05932	1.05607	1.06202	1.06141	1.05907	1.05666	1.06072	1.05634	1.06411	1.06618	1.05983	1.06621	1.0697	1.05645	1.05951	1.05852	1.06313	1.06478	1.06514	1.0699	1.07432	1.06763	1.06875
172	131	3	1.04114	1.04276	1.04013	1.04141	1.04303	1.04304	1.0446	1.04271	1.04248	1.04274	1.05097	1.04652	1.0515	1.0695	1.08554	1.10157	1.08621	1.05729	1.05218	1.04992	1.04667	1.04864	1.04652	1.05024	1.047	1.04966	1.04657	1.04583	1.05096	1.05407	1.07	1.06966	1.05822	1.05436	1.0868	1.06154	1.06041	1.06703	1.06559	1.06968	1.07763	1.05699	1.05769	1.05857	1.05971	1.06079	1.0558
173	132	3	1.05825	1.05809	1.05891	1.06579	1.07194	1.07671	1.08351	1.09413	1.10573	1.10088	1.10516	1.09669	1.10587	1.12716	1.12638	1.13117	1.12322	1.10909	1.0951	1.09646	1.08367	1.08798	1.08385	1.08356	1.08564	1.08013	1.08006	1.07799	1.08281	1.07761	1.08688	1.07749	1.07964	1.07535	1.07323	1.07752	1.07777	1.06274	1.05648	1.05389	1.05537	1.05132	1.05594	1.0559	1.05855	1.05996	1.06162
174	133	3	1.06217	1.0583	1.05653	1.06773	1.06289	1.0589	1.05853	1.0608	1.06333	1.06168	1.06426	1.07663	1.09784	1.1154	1.12781	1.12171	1.10276	1.08777	1.07491	1.07948	1.08932	1.07474	1.06693	1.06762	1.06909	1.06889	1.06916	1.07469	1.07475	1.07555	1.07034	1.07573	1.08509	1.08167	1.08368	1.0837	1.08565	1.06788	1.06896	1.0686	1.07028	1.06699	1.073	1.07323	1.07359	1.07232	1.06934
175	131	3	1.04431	1.04577	1.04737	1.04504	1.04929	1.04623	1.04702	1.04563	1.04466	1.04335	1.0444	1.05607	1.06266	1.07563	1.06781	1.07446	1.0724	1.05801	1.06234	1.05591	1.05403	1.05843	1.05748	1.05589	1.05747	1.05682	1.07489	1.06869	1.0681	1.07673	1.07936	1.08284	1.09307	1.0942	1.09982	1.10575	1.1018	1.07077	1.07181	1.07133	1.0694	1.06809	1.07182	1.06728	1.06994	1.06509	1.05942
176	134	3	1.0551	1.05353	1.05329	1.05168	1.05254	1.05197	1.05537	1.05491	1.05498	1.051	1.05083	1.07217	1.08966	1.10047	1.12241	1.11453	1.09506	1.11774	1.11063	1.09032	1.08445	1.08105	1.07954	1.07792	1.07461	1.07715	1.07449	1.0738	1.07192	1.08143	1.08486	1.08806	1.09026	1.09625	1.08713	1.09758	1.09065	1.08351	1.08393	1.0797	1.08671	1.08318	1.08473	1.0824	1.08026	1.07394	1.07219
177	135	3	1.05238	1.05055	1.04764	1.0504	1.04863	1.05262	1.05465	1.05085	1.04787	1.05282	1.0449	1.05069	1.06901	1.10711	1.11438	1.10004	1.08669	1.07547	1.06596	1.05841	1.06051	1.05435	1.06693	1.06226	1.07323	1.0579	1.05994	1.06433	1.07983	1.06029	1.072	1.06519	1.07577	1.05697	1.06441	1.05868	1.05526	1.07612	1.08068	1.07333	1.07476	1.07551	1.07169	1.0737	1.07022	1.07024	1.0816
178	136	3	1.05515	1.05339	1.05474	1.0521	1.05733	1.04904	1.05795	1.04889	1.05125	1.04798	1.05071	1.0463	1.06542	1.12984	1.16954	1.15515	1.08416	1.13756	1.11036	1.089	1.05678	1.05641	1.0508	1.05133	1.0527	1.07121	1.06018	1.05388	1.05726	1.06141	1.05413	1.05561	1.05825	1.0649	1.06546	1.05707	1.06095	1.04683	1.04571	1.04445	1.04272	1.03963	1.04183	1.04003	1.03859	1.0393	1.03887
179	137	3	1.04197	1.04453	1.04103	1.04164	1.04094	1.03932	1.04299	1.03907	1.04538	1.04237	1.05474	1.0455	1.06485	1.08228	1.09804	1.08403	1.09307	1.07663	1.05661	1.04716	1.0464	1.0513	1.04641	1.04959	1.04827	1.04554	1.04517	1.04798	1.04676	1.0497	1.04567	1.05016	1.05408	1.05305	1.04874	1.04608	1.05096	1.05819	1.06088	1.05806	1.05989	1.06147	1.05831	1.06072	1.05649	1.06254	1.05766
180	137	3	1.03823	1.04935	1.03842	1.03971	1.03907	1.04007	1.04008	1.04119	1.04237	1.05398	1.04319	1.04983	1.06896	1.08384	1.09114	1.09771	1.09382	1.10233	1.09564	1.0701	1.06591	1.05688	1.0633	1.06507	1.0596	1.06086	1.05964	1.05976	1.05986	1.06357	1.06412	1.0679	1.06617	1.06684	1.06486	1.06323	1.0616	1.0609	1.07541	1.07498	1.06206	1.06315	1.07404	1.06362	1.06439	1.06205	1.06598
181	138	3	1.04735	1.04413	1.04857	1.04466	1.04354	1.04932	1.05247	1.0588	1.06097	1.0625	1.05611	1.05674	1.07264	1.08696	1.10717	1.10496	1.10081	1.08513	1.0828	1.07815	1.08036	1.08196	1.07513	1.07952	1.07773	1.07673	1.07581	1.09457	1.08585	1.0857	1.08488	1.0839	1.08217	1.08235	1.08324	1.08753	1.08697	1.07456	1.07465	1.07748	1.07267	1.06593	1.06779	1.10898	1.06429	1.07314	1.06435
182	139	3	1.06365	1.06535	1.06857	1.07086	1.07086	1.06751	1.07212	1.07588	1.07783	1.07481	1.08265	1.09806	1.11755	1.13551	1.16379	1.16109	1.14561	1.136	1.13583	1.12689	1.12186	1.10776	1.12494	1.12048	1.12054	1.10989	1.10611	1.09703	1.09576	1.09424	1.08944	1.09444	1.09235	1.08697	1.08052	1.07867	1.07893	1.0692	1.07072	1.07221	1.07307	1.07791	1.08572	1.07602	1.06773	1.06718	1.06583
183	140	3	1.05714	1.05255	1.04886	1.04695	1.04557	1.0442	1.04456	1.04448	1.04367	1.04328	1.04319	1.0497	1.07758	1.10251	1.11969	1.12001	1.09083	1.09316	1.05493	1.04829	1.04918	1.04813	1.04895	1.04711	1.04897	1.06677	1.06408	1.04368	1.04385	1.04431	1.04307	1.04672	1.0545	1.04592	1.04805	1.05206	1.05266	1.06139	1.06247	1.05713	1.05883	1.05199	1.05186	1.05324	1.05389	1.05121	1.0528
184	141	3	1.05451	1.05304	1.05072	1.05341	1.05517	1.05192	1.05505	1.05373	1.05658	1.05378	1.04622	1.04749	1.06179	1.0887	1.10812	1.12213	1.10037	1.08997	1.09721	1.09269	1.06943	1.07484	1.05872	1.0577	1.05434	1.05609	1.054	1.05749	1.0567	1.05775	1.05758	1.05973	1.06329	1.06027	1.06342	1.06056	1.05984	1.06839	1.06806	1.0681	1.06863	1.06642	1.0712	1.0696	1.062	1.05948	1.06286
185	142	3	1.04746	1.05886	1.05124	1.0594	1.05412	1.04673	1.05339	1.05316	1.05321	1.05794	1.05356	1.05633	1.0674	1.12331	1.1551	1.14966	1.13788	1.11916	1.08159	1.05876	1.05935	1.07263	1.07023	1.05886	1.06012	1.05848	1.06225	1.06049	1.0633	1.06043	1.05886	1.06067	1.07634	1.06457	1.05953	1.07281	1.0738	1.07603	1.0833	1.08115	1.10322	1.15536	1.06494	1.06597	1.0795	1.07062	1.06884
186	143	3	1.0432	1.04172	1.03981	1.0408	1.04356	1.0417	1.04539	1.04678	1.04443	1.04542	1.04351	1.04492	1.06512	1.08057	1.10627	1.11626	1.06126	1.08222	1.08537	1.05882	1.05477	1.05833	1.05351	1.05686	1.05301	1.05419	1.05365	1.05375	1.06966	1.05459	1.05565	1.05917	1.0562	1.05805	1.07051	1.05739	1.05804	1.06845	1.06551	1.06514	1.06276	1.06647	1.06435	1.07009	1.06854	1.06913	1.06516
187	144	3	1.04978	1.04776	1.05274	1.05561	1.05115	1.0609	1.05757	1.05846	1.06225	1.05938	1.05055	1.05572	1.07163	1.0955	1.10714	1.0922	1.09682	1.07816	1.06079	1.06411	1.05095	1.06286	1.06795	1.07727	1.05568	1.06189	1.06011	1.05664	1.05525	1.06144	1.05584	1.05756	1.05484	1.05559	1.06231	1.05513	1.05338	1.0697	1.07347	1.07716	1.07929	1.07237	1.07467	1.07563	1.09752	1.07812	1.07192
188	142	3	1.04219	1.04403	1.04708	1.04802	1.04184	1.04485	1.0453	1.04556	1.04502	1.04569	1.04598	1.05179	1.07487	1.09714	1.1053	1.08021	1.07249	1.1024	1.09395	1.07388	1.06464	1.05514	1.0578	1.05343	1.05166	1.05042	1.04869	1.05721	1.05396	1.04798	1.08359	1.08408	1.05211	1.05934	1.08387	1.08822	1.05441	1.06758	1.06888	1.06445	1.07845	1.09227	1.06599	1.06773	1.06364	1.06386	1.06656
189	143	3	1.03862	1.03923	1.03675	1.03756	1.03699	1.04088	1.04094	1.04442	1.0422	1.04279	1.04193	1.04298	1.05756	1.0706	1.0869	1.07568	1.06509	1.07325	1.08466	1.07033	1.04745	1.04693	1.04721	1.0458	1.04799	1.04578	1.04667	1.04844	1.04837	1.04522	1.04832	1.04753	1.04953	1.0497	1.05134	1.05907	1.06137	1.06306	1.06453	1.06144	1.06679	1.06107	1.06487	1.06713	1.06343	1.05959	1.06191
190	145	3	1.04247	1.04231	1.0447	1.04454	1.04191	1.04339	1.04342	1.04474	1.04176	1.0445	1.04309	1.0444	1.0552	1.06892	1.08144	1.08243	1.05329	1.06912	1.07067	1.06117	1.04978	1.04757	1.04604	1.04542	1.05244	1.04606	1.04688	1.04709	1.046	1.04609	1.05353	1.06132	1.05783	1.05556	1.0491	1.04894	1.05024	1.06243	1.06198	1.06379	1.07398	1.06761	1.07558	1.06794	1.05716	1.05372	1.05428
191	146	3	1.04995	1.04744	1.04412	1.04461	1.04466	1.04417	1.05374	1.05041	1.04743	1.04581	1.04496	1.04719	1.06561	1.11621	1.13644	1.12924	1.14608	1.11912	1.10536	1.04744	1.04891	1.04518	1.04712	1.04783	1.0469	1.04645	1.04583	1.04785	1.05063	1.05291	1.04702	1.04347	1.05001	1.05008	1.04845	1.04299	1.04511	1.04624	1.04577	1.04268	1.04569	1.04331	1.0444	1.04485	1.04281	1.04381	1.04178
192	147	3	1.0538	1.05785	1.05654	1.05784	1.05598	1.05457	1.05662	1.05728	1.05569	1.06149	1.06174	1.05973	1.09221	1.09718	1.10859	1.10831	1.09222	1.09398	1.0928	1.06054	1.07062	1.06297	1.05892	1.06316	1.06039	1.06349	1.06288	1.06451	1.06793	1.06396	1.06596	1.06627	1.06866	1.06948	1.08895	1.07288	1.07937	1.07414	1.06829	1.06965	1.08819	1.10551	1.08519	1.0683	1.09211	1.0714	1.06941
193	148	3	1.04629	1.0495	1.06041	1.05131	1.05152	1.05412	1.06108	1.04955	1.04717	1.0493	1.0521	1.04694	1.06879	1.09137	1.09675	1.10155	1.09661	1.09404	1.08413	1.07432	1.05327	1.04974	1.0483	1.05519	1.0475	1.04778	1.05078	1.04698	1.04906	1.05033	1.05423	1.05209	1.057	1.05495	1.05061	1.06613	1.05073	1.06094	1.05864	1.08374	1.08874	1.07577	1.09515	1.09183	1.09211	1.07141	1.05981
194	148	3	1.03948	1.04296	1.04342	1.04853	1.04434	1.0445	1.04246	1.04469	1.04496	1.05781	1.06378	1.04499	1.07434	1.08105	1.08507	1.08754	1.08338	1.07551	1.07013	1.06414	1.07258	1.07373	1.05389	1.05828	1.05891	1.05911	1.05653	1.05932	1.06445	1.06063	1.0608	1.06089	1.06217	1.06533	1.06372	1.06227	1.06385	1.06156	1.05879	1.06008	1.06584	1.06107	1.06187	1.06267	1.06007	1.05797	1.06009
195	149	3	1.05077	1.0465	1.04436	1.0462	1.04635	1.04367	1.04414	1.04544	1.04602	1.04571	1.04528	1.04141	1.08038	1.10356	1.11486	1.11878	1.09613	1.10119	1.08897	1.0537	1.05612	1.04467	1.0444	1.04724	1.05028	1.04302	1.04572	1.04668	1.05939	1.05025	1.04705	1.05122	1.07107	1.05296	1.05144	1.04872	1.04821	1.05749	1.05522	1.05176	1.05268	1.05234	1.05153	1.05272	1.05364	1.04741	1.04668
196	149	3	1.0386	1.04121	1.04097	1.03724	1.05657	1.05342	1.05024	1.04968	1.04205	1.04526	1.04749	1.04314	1.04725	1.05852	1.11394	1.06598	1.08467	1.07657	1.07526	1.06964	1.05964	1.06402	1.05724	1.05856	1.05788	1.0566	1.04561	1.0486	1.06292	1.06758	1.05592	1.05559	1.04601	1.05489	1.06983	1.05756	1.05401	1.05231	1.04875	1.05033	1.05032	1.05208	1.05391	1.04939	1.0512	1.05344	1.04575
197	147	3	1.05809	1.06054	1.05717	1.05616	1.05443	1.05393	1.07819	1.06301	1.06476	1.05373	1.04721	1.0516	1.07452	1.09098	1.11763	1.1102	1.11458	1.11682	1.08509	1.0597	1.0724	1.05882	1.05688	1.05716	1.05519	1.05322	1.05481	1.05557	1.05449	1.0547	1.05376	1.05771	1.0575	1.06161	1.05527	1.05912	1.05898	1.08126	1.08205	1.08817	1.10711	1.10281	1.10848	1.13829	1.14278	1.12779	1.08788
198	150	3	1.09579	1.09513	1.0827	1.07994	1.08098	1.08411	1.07875	1.07714	1.07501	1.07279	1.06956	1.06666	1.08547	1.07887	1.08566	1.08824	1.08243	1.08141	1.08002	1.07469	1.07089	1.07178	1.07307	1.07144	1.0672	1.05979	1.06139	1.05672	1.05937	1.06087	1.05826	1.05811	1.05662	1.06003	1.05942	1.05594	1.05324	1.04099	1.03942	1.03564	1.03515	1.03259	1.03202	1.03178	1.03154	1.03056	1.03195
199	151	3	1.04811	1.05209	1.06243	1.05039	1.05543	1.05857	1.05706	1.0584	1.05633	1.05886	1.06068	1.06041	1.08292	1.09369	1.10871	1.11664	1.10871	1.0955	1.10275	1.07812	1.07929	1.07819	1.07954	1.09502	1.08197	1.08149	1.08584	1.08449	1.09073	1.09318	1.1086	1.10331	1.1324	1.12912	1.1161	1.1194	1.10838	1.06919	1.06924	1.11383	1.12954	1.084	1.09326	1.07366	1.07348	1.06575	1.07639
200	152	3	1.03904	1.03955	1.0401	1.05987	1.03927	1.04191	1.04277	1.04311	1.04553	1.04331	1.04586	1.04136	1.07045	1.07942	1.09472	1.06659	1.05348	1.0976	1.08216	1.053	1.04643	1.04882	1.06533	1.04442	1.04548	1.0461	1.04677	1.04809	1.05171	1.05242	1.0549	1.05368	1.05632	1.0593	1.06199	1.0662	1.08307	1.06921	1.06651	1.06559	1.08771	1.06814	1.05659	1.05761	1.05751	1.0562	1.05563
201	153	3	1.04254	1.04676	1.04479	1.04438	1.04569	1.05199	1.05078	1.04836	1.05126	1.05091	1.05884	1.0601	1.08619	1.10855	1.11121	1.09419	1.10235	1.10053	1.0956	1.08549	1.10196	1.10928	1.10604	1.09374	1.11394	1.10101	1.10189	1.10003	1.09792	1.10378	1.09392	1.09482	1.08816	1.08297	1.08095	1.08179	1.08016	1.07259	1.07119	1.06783	1.07211	1.06452	1.05955	1.05996	1.05726	1.05907	1.06098
202	154	3	1.05232	1.04805	1.04851	1.05362	1.05247	1.0633	1.06032	1.06211	1.06006	1.05736	1.06067	1.06188	1.09305	1.10282	1.10918	1.09577	1.09412	1.09165	1.06499	1.07309	1.06481	1.07214	1.06427	1.07174	1.06275	1.06123	1.07346	1.06521	1.07003	1.06718	1.07324	1.06808	1.08014	1.06376	1.06077	1.06406	1.06467	1.07182	1.07085	1.09497	1.07082	1.0691	1.07934	1.09448	1.07061	1.07111	1.06739
203	152	3	1.04264	1.04653	1.04332	1.05338	1.0414	1.04388	1.04524	1.04538	1.04488	1.04297	1.04351	1.04183	1.05886	1.07534	1.10346	1.10408	1.09558	1.10388	1.09504	1.05871	1.04828	1.04687	1.0454	1.04439	1.04323	1.0447	1.04392	1.04366	1.05558	1.04345	1.04715	1.04678	1.04452	1.04498	1.04421	1.0445	1.05187	1.06539	1.06681	1.06207	1.07265	1.06605	1.06385	1.06465	1.05944	1.05593	1.05949
204	153	3	1.0538	1.06211	1.05347	1.06136	1.06183	1.07248	1.0699	1.07402	1.07758	1.08683	1.08915	1.10047	1.13105	1.13628	1.15168	1.14915	1.14136	1.13709	1.12119	1.1138	1.10944	1.10782	1.11019	1.11752	1.11802	1.11647	1.12253	1.10617	1.10609	1.113	1.10637	1.10316	1.10723	1.10429	1.09673	1.09749	1.09251	1.07721	1.0908	1.08847	1.08804	1.08307	1.07452	1.07751	1.07268	1.07225	1.08466
205	154	3	1.0442	1.04318	1.04303	1.04316	1.04088	1.04473	1.0486	1.053	1.05677	1.06036	1.0592	1.06486	1.09874	1.0955	1.11033	1.10091	1.09023	1.10104	1.09502	1.0868	1.08798	1.08945	1.10376	1.11263	1.10402	1.11845	1.11436	1.09835	1.10738	1.12083	1.11326	1.11078	1.1135	1.11341	1.11206	1.11297	1.11011	1.07233	1.07092	1.09939	1.07506	1.07365	1.06866	1.0674	1.06656	1.06804	1.06846
206	155	3	1.05095	1.04775	1.04996	1.05111	1.04911	1.06295	1.05737	1.06079	1.06521	1.06239	1.05719	1.05792	1.08821	1.10267	1.11881	1.12922	1.10943	1.10222	1.09678	1.08592	1.11586	1.10886	1.09369	1.08955	1.08756	1.0851	1.09615	1.08855	1.09231	1.09357	1.09553	1.08959	1.10052	1.09684	1.09317	1.09827	1.0971	1.07022	1.06541	1.06962	1.08056	1.0709	1.07574	1.06801	1.06771	1.06503	1.06601
207	151	3	1.04398	1.04231	1.03919	1.04083	1.04339	1.03946	1.04566	1.04162	1.04326	1.04398	1.04166	1.03909	1.05443	1.06406	1.07012	1.07512	1.06598	1.06936	1.05014	1.05127	1.04995	1.05289	1.0512	1.05212	1.04754	1.04887	1.0482	1.05302	1.05718	1.05637	1.05462	1.05627	1.06077	1.07127	1.06136	1.06973	1.07177	1.06729	1.06543	1.06112	1.08137	1.07183	1.07847	1.0689	1.07288	1.06939	1.06008
208	156	3	1.05228	1.04955	1.04929	1.04805	1.04844	1.04828	1.05149	1.05042	1.05109	1.05414	1.05034	1.05237	1.06829	1.10852	1.11521	1.11629	1.12834	1.12754	1.11734	1.10611	1.09591	1.10309	1.09775	1.10348	1.09121	1.08954	1.09238	1.10754	1.08926	1.09754	1.08769	1.09498	1.09405	1.08976	1.10225	1.09153	1.08218	1.07128	1.07364	1.07154	1.07253	1.07174	1.06737	1.06384	1.0622	1.05811	1.06248
209	155	3	1.04352	1.04432	1.04488	1.04262	1.04444	1.04572	1.05202	1.05259	1.06027	1.05984	1.06375	1.0669	1.1064	1.122	1.13261	1.12729	1.1348	1.13099	1.12028	1.12522	1.13876	1.10787	1.12403	1.10582	1.11222	1.0996	1.09866	1.0938	1.0854	1.09507	1.08114	1.08235	1.07637	1.0787	1.07607	1.07485	1.07051	1.07334	1.07564	1.06629	1.0644	1.06768	1.06159	1.06646	1.07089	1.06112	1.06231
210	157	3	1.04475	1.0428	1.04307	1.0438	1.04445	1.04936	1.04914	1.04785	1.04986	1.04973	1.05056	1.05255	1.08672	1.10598	1.12334	1.12941	1.10203	1.12754	1.10737	1.08853	1.07832	1.07522	1.07534	1.07968	1.07718	1.08001	1.08643	1.08167	1.08855	1.08083	1.08925	1.08307	1.09524	1.09215	1.087	1.10299	1.1057	1.0696	1.06439	1.05922	1.05886	1.06197	1.05972	1.06581	1.06621	1.06505	1.05846
211	158	3	1.06112	1.06147	1.06153	1.06035	1.07568	1.06472	1.06856	1.07229	1.07874	1.07941	1.0767	1.08252	1.12168	1.14536	1.15046	1.13963	1.14964	1.12973	1.13045	1.12507	1.12242	1.11525	1.11201	1.10696	1.10549	1.09837	1.09502	1.08792	1.08421	1.08603	1.08492	1.07383	1.07927	1.07772	1.07859	1.07824	1.07932	1.07228	1.06748	1.07018	1.06945	1.07274	1.07073	1.07201	1.07112	1.07071	1.0714
212	159	3	1.06549	1.06308	1.06365	1.06422	1.06405	1.05434	1.08291	1.06267	1.05318	1.04993	1.0485	1.04935	1.08149	1.09679	1.10801	1.11945	1.11916	1.13047	1.10345	1.09696	1.09118	1.07179	1.0563	1.05511	1.05283	1.05461	1.05633	1.05477	1.05587	1.06903	1.06155	1.05973	1.07657	1.06389	1.05699	1.0592	1.0565	1.07858	1.07798	1.09026	1.07729	1.07896	1.07284	1.09138	1.11849	1.10388	1.07735
213	158	3	1.08269	1.08116	1.07341	1.08543	1.0959	1.08487	1.09148	1.10197	1.10134	1.10229	1.09901	1.11074	1.15492	1.16332	1.16563	1.16588	1.15358	1.13392	1.12935	1.11441	1.11976	1.11129	1.10743	1.10729	1.09847	1.1008	1.09397	1.08974	1.0918	1.09038	1.08591	1.07646	1.08417	1.07735	1.08352	1.08388	1.08861	1.06636	1.07075	1.06699	1.07614	1.09584	1.0867	1.07099	1.07832	1.07322	1.06899
214	159	3	1.04426	1.04409	1.04536	1.04221	1.04399	1.04149	1.04625	1.04081	1.04301	1.04186	1.04111	1.03997	1.07171	1.07832	1.08519	1.08658	1.07251	1.11584	1.07729	1.07351	1.04611	1.04706	1.04468	1.04929	1.04609	1.04543	1.04449	1.04711	1.04918	1.04941	1.05025	1.05313	1.04815	1.05256	1.0789	1.07982	1.06757	1.06978	1.07007	1.0896	1.07632	1.06153	1.06025	1.05996	1.06214	1.0569	1.06281
215	160	3	1.052	1.05302	1.0554	1.05236	1.05007	1.05171	1.0525	1.05682	1.05349	1.05538	1.054	1.05239	1.08886	1.10879	1.12533	1.13524	1.11984	1.09607	1.09822	1.08399	1.07144	1.07013	1.07536	1.06813	1.06795	1.06639	1.08151	1.07238	1.06329	1.06681	1.06518	1.06287	1.06411	1.06698	1.0644	1.06419	1.06388	1.07047	1.0685	1.07577	1.0792	1.06845	1.07476	1.07305	1.07547	1.10718	1.08429
216	161	3	1.05256	1.05919	1.05355	1.05104	1.05396	1.05228	1.05272	1.06067	1.05	1.05446	1.05469	1.05705	1.08686	1.10705	1.10999	1.09312	1.10474	1.10886	1.10815	1.08463	1.07428	1.07295	1.06564	1.0742	1.0675	1.08584	1.07237	1.06702	1.07039	1.07057	1.0754	1.0691	1.07588	1.07489	1.07211	1.06531	1.07693	1.08376	1.08966	1.07828	1.07545	1.07674	1.07141	1.07082	1.06886	1.06367	1.06365
217	162	3	1.04851	1.05192	1.0488	1.05135	1.04977	1.05005	1.05005	1.05641	1.05193	1.07728	1.05053	1.06396	1.09118	1.11606	1.13611	1.11082	1.13347	1.11116	1.12401	1.08662	1.08448	1.06687	1.05778	1.06035	1.05592	1.07612	1.06248	1.07836	1.06039	1.05634	1.10591	1.08231	1.08326	1.11677	1.0884	1.074	1.05692	1.06467	1.06553	1.06247	1.06226	1.06424	1.06402	1.06403	1.06576	1.0731	1.06651
218	163	3	1.04993	1.04651	1.04286	1.04192	1.04304	1.07102	1.05423	1.04961	1.06947	1.04663	1.0482	1.04531	1.10136	1.13106	1.14149	1.13423	1.13021	1.14555	1.1188	1.08622	1.07353	1.05348	1.0506	1.04593	1.0574	1.05281	1.06107	1.0536	1.04764	1.06294	1.06026	1.052	1.04921	1.05577	1.05135	1.0545	1.05202	1.06334	1.06143	1.05666	1.05438	1.05546	1.06157	1.06615	1.06769	1.06299	1.05559
219	164	3	1.05728	1.05365	1.05511	1.05393	1.05169	1.05908	1.06825	1.0544	1.05884	1.05191	1.0557	1.06002	1.08316	1.09361	1.11927	1.11394	1.11707	1.10117	1.10052	1.09927	1.09211	1.08841	1.091	1.08838	1.10287	1.09157	1.08164	1.09164	1.0854	1.09573	1.0971	1.09264	1.09419	1.09291	1.09295	1.08525	1.09128	1.07523	1.078	1.07404	1.07191	1.07356	1.0766	1.10541	1.10616	1.08741	1.06253
220	165	3	1.05548	1.05504	1.05477	1.05371	1.05414	1.05542	1.05833	1.0571	1.05896	1.06104	1.06294	1.06467	1.10321	1.12517	1.12238	1.10078	1.10282	1.11926	1.11807	1.11557	1.11547	1.13999	1.11746	1.107	1.10997	1.09901	1.09763	1.10245	1.09373	1.09668	1.09367	1.0858	1.08571	1.08229	1.08378	1.08035	1.08076	1.07005	1.06741	1.06388	1.0656	1.06214	1.06838	1.07284	1.06237	1.0623	1.06347
221	163	3	1.04112	1.03966	1.04157	1.04076	1.03969	1.0429	1.0398	1.04296	1.04216	1.04313	1.04297	1.0409	1.0734	1.09918	1.12378	1.06434	1.09619	1.12382	1.11793	1.07382	1.04827	1.04576	1.04635	1.04641	1.04644	1.05235	1.04876	1.07847	1.05093	1.05663	1.05849	1.04883	1.05282	1.05449	1.05082	1.05397	1.05568	1.05524	1.05224	1.05191	1.05209	1.04874	1.05005	1.05213	1.0504	1.05018	1.0492
[truncated: 76 more columns]
