# Supplementary material for: Modeling single-cell phenotypes links yeast stress acclimation to transcriptional repression and pre-stress cellular states
Source: eLife. 2022 Nov 9;11:e82017. doi: 10.7554/eLife.82017 (PMC9678356; doi:10.7554/eLife.82017)
Supplement: Source data 2. — The following is a description of the data within the file ‘Source-Data-2.xls’. Each row represents data for an individual cell from strain AGY1813 (Msn2-mCherry, Dot6-GFP, Ctt1-iRFP). There are 45 time point measurements in this table, labeled T01 through T45 for replicates 1 and 2. There are 43 time point measurements in this table, labeled T01 through T43 for replicate 3. Each measurement is taken 6 minutes apart (i.e T01 is at the start, T02 is 6 minutes into the experiment, T03 is 12 minutes in, and so on). T01 – T12 represent time points before NaCl is added, T13 through T22 represent the initial acute response to salt, and T23 – T43/5 represent the acclimated response. [Column 1] Header: cell_numb This is the unique identifier for each cell in the dataset. [Column 2] Header: colony_numb The colony_numb is different than cell_numb in that if a given cell is part of a two-cell colony, both of these cells in the colony will have the same colony_numb number, but different cell_numb numbers. For example, if two cells are part of colony 3, they will both have a 3 in their colony_numb column. For this dataset, we only analyzed colonies that were either 1 or 2 cells in size at the start of the experiment. [Column 3] Header: replicate Which of the three replicate (batch) experiments each cell comes from. [Columns 4–48] Headers: Msn2_ratio_T01 - Msn2_ratio_T45 [Columns 49–93] Headers: Dot6_ratio_T01 - Dot6_ratio_T45 Data points indicate nuclear_versus_cytoplasmic ratio (average of the top 5% of pixels divided by the median pixel intensity of all pixels in the cell) for Msn2 or Dot6, as indicated in header [Columns 94–138 ] Headers: Ctt1_norm_T01 – Ctt1_norm_T45 Data point indicate normalized Ctt1 abundance (median pixel intensity of all pixels in the cell normalized by dividing the background median pixel intensity of each image that the cell belonged to). [Columns 139–183] Headers: col_size_T01 – col_size_T45 Each values estimates the size of the colony (measured as t [file elife-82017-data2.xlsx]

## Sheet: AGY1813
1	2	3	4	5	6	7	8	9	10	11	12	13	14	15	16	17	18	19	20	21	22	23	24	25	26	27	28	29	30	31	32	33	34	35	36	37	38	39	40	41	42	43	44	45	46	47	48	49	50
cell_numb	colony_numb	replicate	Msn2_ratio_T01	Msn2_ratio_T02	Msn2_ratio_T03	Msn2_ratio_T04	Msn2_ratio_T05	Msn2_ratio_T06	Msn2_ratio_T07	Msn2_ratio_T08	Msn2_ratio_T09	Msn2_ratio_T10	Msn2_ratio_T11	Msn2_ratio_T12	Msn2_ratio_T13	Msn2_ratio_T14	Msn2_ratio_T15	Msn2_ratio_T16	Msn2_ratio_T17	Msn2_ratio_T18	Msn2_ratio_T19	Msn2_ratio_T20	Msn2_ratio_T21	Msn2_ratio_T22	Msn2_ratio_T23	Msn2_ratio_T24	Msn2_ratio_T25	Msn2_ratio_T26	Msn2_ratio_T27	Msn2_ratio_T28	Msn2_ratio_T29	Msn2_ratio_T30	Msn2_ratio_T31	Msn2_ratio_T32	Msn2_ratio_T33	Msn2_ratio_T34	Msn2_ratio_T35	Msn2_ratio_T36	Msn2_ratio_T37	Msn2_ratio_T38	Msn2_ratio_T39	Msn2_ratio_T40	Msn2_ratio_T41	Msn2_ratio_T42	Msn2_ratio_T43	Msn2_ratio_T44	Msn2_ratio_T45	Dot6_ratio_T01	Dot6_ratio_T02
1	1	1	1.08483	1.09362	1.09097	1.09449	1.09778	1.09171	1.09595	1.08826	1.09158	1.09859	1.08389	1.10141	1.09081	1.22699	1.29033	1.28755	1.28844	1.28383	1.26215	1.26589	1.16517	1.18341	1.16765	1.2332	1.23566	1.22915	1.22399	1.21067	1.17966	1.20684	1.21415	1.25122	1.22329	1.22636	1.25929	1.28053	1.31299	1.26286	1.26389	1.27538	1.22583	1.2187	1.1957	1.18109	1.17809	1.14916	1.17689
2	2	1	1.07312	1.06819	1.08335	1.0707	1.087	1.09737	1.09768	1.11235	1.10175	1.22746	1.1268	1.18254	1.1212	1.29445	1.34645	1.28723	1.27208	1.2609	1.21435	1.23987	1.17145	1.26143	1.21108	1.19459	1.24158	1.1716	1.25306	1.196	1.16173	1.1649	1.16872	1.17496	1.1513	1.13817	1.13118	1.13786	1.13216	1.13792	1.13951	1.13674	1.15809	1.14086	1.12675	1.1275	1.11852	1.18289	1.17395
3	1	1	1.09368	1.11681	1.09885	1.10575	1.10487	1.14496	1.11432	1.06981	1.08875	1.14952	1.09859	1.07169	1.08419	1.26372	1.29796	1.30369	1.28983	1.24789	1.22125	1.18032	1.22228	1.14562	1.18059	1.15624	1.09698	1.11313	1.15065	1.14739	1.20864	1.19245	1.1688	1.14677	1.13691	1.16718	1.13808	1.15031	1.14946	1.15335	1.12397	1.11265	1.10283	1.09368	1.09482	1.11464	1.09699	1.17931	1.1906
4	3	1	1.1672	1.12452	1.08885	1.09575	1.0977	1.10911	1.10013	1.10434	1.10973	1.12053	1.10738	1.15969	1.14999	1.19759	1.28497	1.39435	1.36141	1.31965	1.29961	1.19547	1.37621	1.39027	1.3515	1.30957	1.29945	1.28603	1.31683	1.32335	1.25122	1.26828	1.22526	1.23157	1.19998	1.2343	1.20251	1.20212	1.18173	1.15826	1.17066	1.16699	1.14964	1.15834	1.15347	1.14508	1.13273	1.23643	1.23823
5	4	1	1.08886	1.09478	1.08123	1.08661	1.12149	1.09625	1.11966	1.09579	1.0766	1.09853	1.13054	1.08253	1.08685	1.24465	1.27754	1.28906	1.30779	1.29096	1.28078	1.26222	1.22508	1.17482	1.17685	1.19004	1.21673	1.16662	1.26623	1.22774	1.28848	1.26371	1.2284	1.24992	1.26769	1.24163	1.26934	1.26208	1.22505	1.18742	1.18413	1.21218	1.15598	1.16517	1.16703	1.13545	1.1195	1.13044	1.16587
6	5	1	1.08603	1.07461	1.07224	1.09346	1.11065	1.1663	1.09478	1.07595	1.08368	1.07196	1.06699	1.08797	1.06749	1.28472	1.32693	1.33125	1.3498	1.29522	1.2834	1.20223	1.16883	1.19823	1.22414	1.13347	1.2609	1.28404	1.24522	1.24617	1.2712	1.23224	1.34346	1.30315	1.34139	1.28657	1.29009	1.2654	1.27199	1.27034	1.22347	1.21315	1.24984	1.23465	1.2301	1.22489	1.21918	1.12882	1.14202
7	6	1	1.07029	1.08174	1.08137	1.11846	1.07238	1.06326	1.06174	1.07746	1.07624	1.07581	1.12279	1.06813	1.06845	1.20129	1.27504	1.30466	1.29259	1.278	1.1607	1.09239	1.11072	1.13912	1.10203	1.10964	1.08104	1.07955	1.07728	1.13512	1.11171	1.07412	1.14081	1.13615	1.13671	1.17539	1.14078	1.07036	1.11465	1.14206	1.23969	1.08511	1.08538	1.23386	1.08523	1.09777	1.25753	1.12746	1.19364
8	7	1	1.09655	1.0879	1.09705	1.09391	1.10522	1.11099	1.07691	1.09882	1.08606	1.08837	1.09298	1.07682	1.05573	1.09711	1.099	1.10183	1.12247	1.09858	1.08331	1.07615	1.06903	1.07077	1.06097	1.07452	1.06964	1.07178	1.06048	1.06167	1.0628	1.06343	1.08774	1.06087	1.06381	1.06588	1.06482	1.06563	1.07044	1.07215	1.06783	1.0616	1.05558	1.05907	1.06524	1.06905	1.06861	1.2219	1.20606
9	7	1	1.10814	1.09577	1.08769	1.08801	1.09919	1.11322	1.10478	1.12457	1.10597	1.1503	1.09874	1.08396	1.08455	1.22489	1.3298	1.26336	1.21146	1.25171	1.21206	1.13012	1.13654	1.09015	1.08556	1.09026	1.09148	1.09175	1.09736	1.1012	1.09201	1.08459	1.08445	1.09076	1.08933	1.0909	1.09054	1.09545	1.12699	1.11204	1.13134	1.10874	1.11341	1.13739	1.29535	1.08884	1.08891	1.27551	1.19268
10	8	1	1.10877	1.17448	1.1499	1.13207	1.15371	1.10649	1.11606	1.13376	1.15765	1.11617	1.11844	1.11343	1.11446	1.26681	1.31725	1.35856	1.31982	1.26698	1.27473	1.28827	1.23586	1.19725	1.22437	1.20004	1.18284	1.19288	1.17368	1.16607	1.18161	1.19369	1.16745	1.18285	1.15706	1.15622	1.15173	1.14953	1.13179	1.13908	1.13199	1.13097	1.13431	1.139	1.13368	1.12953	1.12984	1.20085	1.15987
11	9	1	1.09635	1.09463	1.09212	1.08809	1.07963	1.08016	1.07863	1.07851	1.0764	1.0866	1.08619	1.08087	1.08378	1.23515	1.29069	1.22809	1.18672	1.20821	1.16837	1.1531	1.12609	1.18124	1.15701	1.20301	1.14066	1.19906	1.16305	1.17838	1.24869	1.27289	1.21038	1.24247	1.2328	1.19847	1.2129	1.23282	1.21631	1.20431	1.19207	1.18539	1.18183	1.17541	1.16664	1.18613	1.1608	1.21786	1.2176
12	10	1	1.1084	1.07547	1.06507	1.07316	1.07223	1.07385	1.07932	1.08803	1.09577	1.10201	1.11532	1.11263	1.11059	1.1035	1.11267	1.13429	1.1089	1.10369	1.11289	1.10781	1.11681	1.11157	1.12454	1.11816	1.11281	1.10883	1.11169	1.1168	1.1175	1.1111	1.09955	1.1099	1.1059	1.10031	1.10903	1.11931	1.10856	1.11469	1.15448	1.11726	1.12066	1.13663	1.1107	1.11706	1.15426	1.23619	1.22374
13	11	1	1.1008	1.10774	1.10984	1.11767	1.10942	1.11819	1.15808	1.13803	1.17061	1.12211	1.10428	1.11722	1.1185	1.23098	1.29155	1.271	1.21182	1.20045	1.14083	1.16483	1.13251	1.12126	1.11619	1.11816	1.12107	1.11828	1.11867	1.11931	1.12328	1.14155	1.14421	1.12614	1.12516	1.1485	1.15523	1.17418	1.19949	1.18009	1.19967	1.2134	1.20552	1.21996	1.24273	1.24639	1.24624	1.23723	1.27924
14	12	1	1.07754	1.15685	1.09153	1.10213	1.077	1.08422	1.11109	1.103	1.21158	1.12415	1.081	1.09789	1.14702	1.23703	1.28672	1.23551	1.26484	1.32577	1.26546	1.13271	1.20183	1.17775	1.21009	1.17052	1.13548	1.11819	1.13834	1.11085	1.20589	1.109	1.15425	1.18838	1.10162	1.107	1.10686	1.09657	1.11935	1.10212	1.09995	1.14443	1.15046	1.15121	1.10589	1.13656	1.0895	1.22256	1.22574
15	13	1	1.07569	1.0634	1.07046	1.06609	1.05697	1.08747	1.10763	1.11133	1.09806	1.09745	1.08972	1.09151	1.09071	1.21449	1.21748	1.19213	1.11262	1.20044	1.15268	1.16386	1.13575	1.09783	1.12853	1.11244	1.10927	1.11738	1.11874	1.1467	1.1246	1.13985	1.12207	1.12395	1.12757	1.14636	1.1375	1.1211	1.10196	1.10661	1.10814	1.13818	1.11406	1.12747	1.14118	1.14583	1.21843	1.20619	1.17078
16	14	1	1.09824	1.09419	1.08679	1.0848	1.10167	1.08108	1.07912	1.0828	1.07811	1.07549	1.0765	1.08028	1.07986	1.23782	1.23495	1.22529	1.19229	1.2252	1.25681	1.23314	1.15569	1.11727	1.11221	1.20757	1.21148	1.09981	1.16655	1.1937	1.19878	1.262	1.19243	1.23346	1.2517	1.23971	1.23352	1.22536	1.27371	1.26958	1.25606	1.26344	1.20728	1.15937	1.15828	1.15448	1.14407	1.1889	1.17145
17	15	1	1.14793	1.12684	1.07979	1.08403	1.09139	1.10936	1.10274	1.08557	1.09568	1.12316	1.09003	1.12024	1.12141	1.20676	1.26021	1.26308	1.27127	1.2423	1.2423	1.22886	1.24412	1.10553	1.23557	1.24305	1.25661	1.24612	1.2247	1.31281	1.27532	1.18525	1.17916	1.1704	1.13889	1.16798	1.23827	1.18642	1.19741	1.29497	1.2235	1.22993	1.2934	1.20988	1.19295	1.20332	1.20008	1.27615	1.36431
18	16	1	1.10674	1.11597	1.09368	1.17869	1.14547	1.11886	1.11677	1.09783	1.11776	1.08894	1.09292	1.14927	1.08427	1.26785	1.30788	1.32095	1.32056	1.24405	1.20052	1.13414	1.15519	1.11159	1.12328	1.10817	1.18754	1.16628	1.19269	1.24458	1.23339	1.22318	1.15975	1.23814	1.16618	1.15726	1.18489	1.17482	1.16578	1.16258	1.12694	1.14009	1.14269	1.22716	1.12531	1.18073	1.27129	1.14044	1.25436
19	15	1	1.09463	1.08385	1.08325	1.08268	1.08964	1.07625	1.07444	1.07487	1.06946	1.07128	1.07176	1.10629	1.09001	1.20584	1.23081	1.23815	1.18311	1.1484	1.10266	1.10139	1.0941	1.08905	1.11275	1.14414	1.20328	1.19532	1.16951	1.22906	1.19996	1.17474	1.19109	1.19398	1.29381	1.28883	1.27758	1.26513	1.30769	1.30456	1.31348	1.32187	1.29423	1.24967	1.25226	1.21857	1.20161	1.19823	1.19767
20	9	1	1.08621	1.09849	1.09344	1.08617	1.08527	1.08577	1.07483	1.07005	1.06864	1.06589	1.07431	1.07991	1.07477	1.23082	1.26218	1.23124	1.27634	1.24021	1.17142	1.18003	1.09383	1.088	1.08648	1.11624	1.08677	1.09831	1.13959	1.11637	1.12491	1.08395	1.08693	1.08729	1.08819	1.07623	1.08213	1.11384	1.0954	1.08923	1.09309	1.10123	1.09562	1.09085	1.08116	1.08956	1.08326	1.23976	1.19615
21	11	1	1.09428	1.11396	1.114	1.12562	1.12458	1.14399	1.1569	1.1374	1.14748	1.17813	1.18923	1.14612	1.14408	1.32344	1.38471	1.30933	1.23037	1.20263	1.28155	1.24842	1.17635	1.27422	1.30425	1.28973	1.25838	1.20104	1.25745	1.19805	1.16166	1.25586	1.20501	1.15292	1.1535	1.15114	1.15596	1.15926	1.15756	1.19143	1.15142	1.14752	1.19074	1.16799	1.14764	1.16264	1.14457	1.23336	1.22786
22	17	1	1.07981	1.08001	1.07996	1.07555	1.07568	1.07794	1.08045	1.08358	1.07732	1.08177	1.07866	1.06647	1.08048	1.29039	1.30375	1.31455	1.30057	1.28594	1.2194	1.12467	1.10251	1.07179	1.06505	1.09536	1.07325	1.21368	1.08399	1.13103	1.15089	1.07749	1.17214	1.08604	1.09068	1.13798	1.10682	1.11123	1.08824	1.07587	1.10553	1.08083	1.11996	1.08479	1.1016	1.11036	1.14635	1.14306	1.15568
23	13	1	1.11676	1.11228	1.10779	1.10269	1.10601	1.10942	1.09694	1.1053	1.10064	1.10776	1.09634	1.09198	1.09879	1.33298	1.38214	1.35593	1.36948	1.34318	1.28866	1.2904	1.29487	1.20087	1.11306	1.1511	1.12728	1.11175	1.15643	1.10876	1.10944	1.19064	1.2407	1.13129	1.12076	1.10686	1.13301	1.11754	1.1435	1.11819	1.09789	1.15524	1.22519	1.2326	1.21251	1.17264	1.19456	1.19283	1.21122
24	14	1	1.13126	1.11778	1.14981	1.10825	1.16553	1.19379	1.09672	1.10792	1.09997	1.09864	1.10928	1.09984	1.09682	1.30905	1.35311	1.36404	1.36844	1.32875	1.33325	1.32707	1.21833	1.2085	1.197	1.26766	1.31899	1.21249	1.26294	1.27674	1.23741	1.34406	1.31101	1.29889	1.29718	1.32465	1.35346	1.3246	1.28428	1.30611	1.28894	1.31435	1.25345	1.25613	1.20891	1.18263	1.19549	1.28273	1.18073
25	10	1	1.11293	1.16099	1.11422	1.11505	1.09913	1.09493	1.10024	1.1449	1.13049	1.17072	1.094	1.165	1.06739	1.31862	1.33343	1.36474	1.32135	1.28914	1.27269	1.21162	1.21051	1.10977	1.08084	1.07533	1.08197	1.07686	1.07222	1.0729	1.08177	1.10656	1.1053	1.12793	1.08294	1.08158	1.09365	1.08482	1.08174	1.07951	1.09184	1.08347	1.07358	1.1405	1.15895	1.08776	1.09575	1.18089	1.25893
26	8	1	1.11717	1.11355	1.11153	1.12678	1.18811	1.16489	1.18482	1.20308	1.20416	1.14865	1.18056	1.18734	1.18398	1.27235	1.28253	1.29475	1.28235	1.26336	1.24262	1.26071	1.23287	1.20641	1.24999	1.24231	1.25746	1.23629	1.22864	1.20022	1.22062	1.14564	1.16181	1.17443	1.16601	1.16204	1.16118	1.15003	1.14862	1.15746	1.1564	1.16189	1.16153	1.16792	1.16736	1.16457	1.17446	1.25063	1.20877
27	18	1	1.08088	1.09323	1.07871	1.10232	1.08243	1.07357	1.06934	1.07123	1.09092	1.09362	1.07461	1.06987	1.06925	1.14615	1.17971	1.21267	1.18967	1.18198	1.19969	1.16028	1.16068	1.10173	1.09271	1.07388	1.07866	1.07689	1.07776	1.07819	1.0752	1.07638	1.08563	1.07975	1.11461	1.09068	1.09631	1.09528	1.07883	1.0909	1.08208	1.09607	1.1133	1.10582	1.08036	1.09936	1.08804	1.18373	1.17586
28	19	1	1.16897	1.15628	1.14543	1.13917	1.13855	1.13506	1.13161	1.13266	1.12245	1.12793	1.11996	1.11836	1.13129	1.35139	1.4199	1.38485	1.37169	1.39935	1.34756	1.23502	1.13385	1.13048	1.13081	1.13201	1.14601	1.13811	1.12969	1.1365	1.14283	1.16264	1.16351	1.16546	1.18853	1.19896	1.16779	1.17825	1.2076	1.17116	1.16938	1.16772	1.17694	1.17098	1.18323	1.16509	1.16639	1.12995	1.10717
29	20	1	1.07708	1.0727	1.07422	1.08547	1.0661	1.06905	1.06677	1.06711	1.06411	1.07523	1.07739	1.06971	1.08049	1.1351	1.14128	1.12461	1.11228	1.08509	1.07372	1.07462	1.07848	1.07147	1.06862	1.06365	1.06835	1.07702	1.06655	1.06945	1.06725	1.06371	1.06582	1.0822	1.08782	1.09188	1.08622	1.0865	1.08263	1.09256	1.08266	1.07869	1.07138	1.07318	1.07987	1.07836	1.08091	1.26474	1.19471
30	18	1	1.08455	1.09804	1.08186	1.11277	1.09282	1.07989	1.07865	1.08086	1.08185	1.07542	1.08608	1.07791	1.10349	1.23071	1.26226	1.24182	1.22563	1.17534	1.17641	1.17426	1.17118	1.10025	1.10551	1.09018	1.09251	1.09062	1.09173	1.09118	1.09635	1.1138	1.10021	1.11445	1.18277	1.14257	1.10435	1.09715	1.08827	1.10619	1.11299	1.14509	1.12966	1.11412	1.12666	1.10537	1.12466	1.23234	1.24949
31	21	1	1.10717	1.10355	1.10364	1.10064	1.10797	1.11634	1.142	1.11264	1.1023	1.08019	1.07726	1.07513	1.14782	1.24301	1.27121	1.27666	1.238	1.19084	1.19283	1.16139	1.14731	1.19024	1.12648	1.17167	1.15105	1.1446	1.14363	1.12022	1.12691	1.12086	1.11818	1.13485	1.12206	1.13355	1.12001	1.11234	1.11441	1.10722	1.11823	1.10647	1.1059	1.0976	1.10882	1.11357	1.11013	1.23499	1.22669
32	21	1	1.0854	1.0779	1.08237	1.08447	1.08319	1.08146	1.12471	1.13317	1.10521	1.08901	1.11896	1.08659	1.10943	1.28326	1.29347	1.28933	1.27946	1.27021	1.22229	1.24577	1.23891	1.22765	1.23207	1.23071	1.16519	1.16332	1.18332	1.14846	1.14709	1.13227	1.12502	1.13641	1.13001	1.12048	1.12366	1.11455	1.11294	1.10424	1.10622	1.10278	1.10494	1.10586	1.10209	1.10166	1.08922	1.232	1.21581
33	22	1	1.13691	1.11412	1.09786	1.10061	1.08883	1.08628	1.08567	1.08289	1.08148	1.08738	1.09486	1.08537	1.09507	1.28102	1.3122	1.24326	1.13433	1.11208	1.09113	1.09658	1.09203	1.10549	1.10167	1.15693	1.14422	1.13472	1.0945	1.11275	1.09727	1.09007	1.24801	1.09507	1.09347	1.12117	1.12878	1.11174	1.17314	1.20068	1.15826	1.10822	1.17437	1.15162	1.19224	1.15551	1.14381	1.23594	1.22869
34	23	1	1.07038	1.06726	1.07126	1.06895	1.07048	1.06847	1.06914	1.06374	1.11012	1.06824	1.06138	1.06077	1.05966	1.16084	1.15849	1.10181	1.16149	1.15362	1.12749	1.11662	1.06969	1.08128	1.07654	1.07863	1.07148	1.08752	1.0788	1.07654	1.07575	1.07604	1.07916	1.11319	1.12611	1.12638	1.10634	1.12242	1.14331	1.1051	1.07944	1.08522	1.10118	1.07684	1.07698	1.07863	1.14492	1.15332	1.16881
35	24	1	1.14645	1.09027	1.08241	1.08454	1.08578	1.07759	1.08901	1.09231	1.07218	1.07723	1.07616	1.06821	1.07032	1.20929	1.24645	1.28625	1.21646	1.22928	1.14996	1.09824	1.09532	1.17234	1.09587	1.18776	1.18585	1.21577	1.21501	1.24927	1.24579	1.26685	1.26072	1.26686	1.24873	1.28808	1.23283	1.2551	1.30602	1.21889	1.14664	1.14366	1.21151	1.19987	1.2935	1.2637	1.18397	1.31891	1.28831
36	25	1	1.11619	1.18072	1.07537	1.10269	1.08505	1.10173	1.09534	1.07038	1.07687	1.0754	1.07183	1.07862	1.11619	1.28237	1.24736	1.27084	1.23856	1.19868	1.08403	1.08101	1.07778	1.08206	1.07789	1.07772	1.07628	1.07737	1.0783	1.07539	1.10153	1.09278	1.07799	1.12221	1.07199	1.07474	1.0962	1.14785	1.09603	1.07225	1.07335	1.08415	1.06892	1.06719	1.06977	1.06869	1.11877	1.2155	1.2047
37	25	1	1.13426	1.15748	1.10066	1.10861	1.10042	1.11497	1.1093	1.10817	1.08185	1.08865	1.08065	1.09828	1.08935	1.34062	1.40728	1.40182	1.38637	1.3406	1.25744	1.08774	1.10595	1.08744	1.09321	1.09766	1.08993	1.12069	1.08802	1.14013	1.15396	1.10874	1.09052	1.08156	1.09077	1.0851	1.10288	1.09889	1.09209	1.0895	1.0949	1.09518	1.1099	1.09393	1.09648	1.09489	1.09802	1.25501	1.22976
38	23	1	1.06599	1.06869	1.06116	1.06391	1.06938	1.06794	1.09011	1.09201	1.06491	1.06615	1.06553	1.06328	1.06506	1.12436	1.14638	1.1549	1.10344	1.13605	1.14251	1.08931	1.07987	1.08162	1.08073	1.07459	1.09523	1.0954	1.08412	1.08976	1.08097	1.08606	1.0852	1.09753	1.08653	1.08979	1.11977	1.10854	1.12303	1.11566	1.10291	1.09741	1.10928	1.10177	1.09647	1.091	1.0808	1.13298	1.18303
39	26	1	1.07339	1.06902	1.06501	1.07019	1.06722	1.06749	1.06295	1.06905	1.06811	1.06775	1.0638	1.06574	1.07736	1.15269	1.17467	1.17014	1.13624	1.13652	1.13668	1.13566	1.13224	1.14912	1.14098	1.17934	1.14929	1.13511	1.14061	1.16947	1.17404	1.1794	1.19157	1.16614	1.16723	1.18331	1.18108	1.17475	1.17601	1.16456	1.17083	1.16243	1.15953	1.14851	1.13341	1.11661	1.11717	1.2478	1.22894
40	26	1	1.07243	1.07411	1.07225	1.07454	1.07718	1.07024	1.07076	1.06881	1.0764	1.10336	1.14464	1.07743	1.13053	1.21993	1.23798	1.24217	1.23521	1.21527	1.18021	1.10126	1.07307	1.06878	1.08929	1.06884	1.0865	1.09891	1.07731	1.0745	1.08533	1.07088	1.07299	1.07336	1.07741	1.07405	1.09327	1.07469	1.0905	1.07876	1.11827	1.11711	1.10902	1.10728	1.09718	1.09466	1.08497	1.17232	1.1698
41	27	1	1.08409	1.07588	1.07672	1.0776	1.0781	1.07414	1.07762	1.07161	1.06926	1.10447	1.09565	1.0913	1.14864	1.21235	1.24474	1.21127	1.17338	1.14809	1.14434	1.15545	1.10717	1.13153	1.10637	1.12533	1.10427	1.1361	1.14536	1.17142	1.16386	1.12967	1.11655	1.11671	1.11535	1.14136	1.14014	1.14931	1.15969	1.14649	1.14164	1.13245	1.13793	1.1309	1.12625	1.1281	1.12627	1.1937	1.17174
42	28	1	1.10738	1.08167	1.08107	1.07339	1.0709	1.06914	1.08623	1.0689	1.12568	1.07332	1.07924	1.0688	1.08804	1.1796	1.19956	1.17126	1.16759	1.12453	1.1301	1.08166	1.07875	1.07453	1.07569	1.06923	1.07612	1.07922	1.08263	1.09033	1.10191	1.13277	1.17182	1.13484	1.10941	1.18141	1.1394	1.13221	1.11743	1.13419	1.13079	1.0927	1.09366	1.08062	1.07461	1.07911	1.08348	1.20167	1.21017
43	29	1	1.07777	1.07494	1.0838	1.07346	1.07636	1.07077	1.07118	1.07827	1.07513	1.07083	1.06875	1.07541	1.08862	1.15514	1.16752	1.14541	1.14913	1.14118	1.12648	1.14174	1.07721	1.10643	1.0819	1.0817	1.07585	1.07537	1.07975	1.07793	1.07769	1.09842	1.09716	1.08364	1.08647	1.08533	1.0784	1.07786	1.08044	1.08821	1.08527	1.09213	1.08278	1.0812	1.0786	1.10756	1.07699	1.29529	1.36831
44	27	1	1.07899	1.08766	1.08676	1.09935	1.08718	1.08133	1.106	1.08289	1.07105	1.1019	1.07282	1.08259	1.12477	1.16054	1.18862	1.12937	1.14999	1.13193	1.08752	1.08833	1.1365	1.09223	1.07887	1.09435	1.12137	1.13574	1.16325	1.1598	1.08983	1.11455	1.13108	1.13977	1.13303	1.11332	1.17169	1.20569	1.21561	1.19732	1.1633	1.12109	1.10346	1.13462	1.11435	1.1441	1.14431	1.24789	1.27167
45	30	1	1.06917	1.06947	1.07107	1.07092	1.07234	1.07648	1.07003	1.07123	1.06936	1.06908	1.0746	1.08733	1.09772	1.16706	1.18572	1.18959	1.18568	1.16017	1.1235	1.13073	1.13984	1.10203	1.08444	1.08375	1.13044	1.08663	1.08141	1.08869	1.08899	1.09977	1.09455	1.11233	1.08931	1.10414	1.10709	1.10283	1.12703	1.10796	1.12677	1.11824	1.1087	1.10598	1.10066	1.10519	1.11136	1.22459	1.21198
46	28	1	1.12922	1.08959	1.08134	1.07852	1.07799	1.07922	1.08263	1.08492	1.08212	1.1382	1.12295	1.1136	1.1759	1.24691	1.27662	1.26011	1.28879	1.25126	1.23291	1.16657	1.11499	1.10467	1.10466	1.0892	1.09713	1.10186	1.09533	1.15301	1.18514	1.18493	1.22356	1.20288	1.21825	1.23466	1.21317	1.17777	1.18006	1.19903	1.17348	1.20855	1.22289	1.20364	1.20395	1.18875	1.16914	1.26436	1.30825
47	29	1	1.07043	1.07345	1.07079	1.06563	1.06693	1.08247	1.07313	1.08081	1.0725	1.05687	1.08411	1.05666	1.07463	1.19387	1.19151	1.19054	1.15484	1.10308	1.06909	1.0634	1.0622	1.06367	1.06331	1.05863	1.06313	1.06702	1.06292	1.06479	1.06645	1.06294	1.06687	1.06458	1.06056	1.05894	1.06485	1.06172	1.06878	1.06303	1.06151	1.10186	1.08128	1.06389	1.07164	1.06729	1.0861	1.12083	1.21109
48	31	1	1.19213	1.17128	1.16705	1.15119	1.15914	1.14851	1.15135	1.14376	1.13826	1.14539	1.13301	1.13833	1.28974	1.41602	1.49614	1.5091	1.46418	1.25973	1.14539	1.13115	1.12607	1.12795	1.12858	1.14272	1.13973	1.13379	1.13209	1.12767	1.13119	1.1394	1.16493	1.17493	1.13728	1.18208	1.29876	1.34903	1.1768	1.22825	1.20166	1.24572	1.33031	1.22221	1.15344	1.14136	1.12545	1.11693	1.12636
49	32	1	1.2371	1.19893	1.21713	1.15999	1.17082	1.15023	1.13738	1.13121	1.12835	1.11354	1.10824	1.10169	1.203	1.4657	1.49315	1.23594	1.12759	1.12238	1.10938	1.12329	1.1094	1.11426	1.11677	1.16845	1.11023	1.10016	1.10213	1.10437	1.11991	1.1953	1.23023	1.30246	1.20215	1.10835	1.15068	1.10273	1.09357	1.1054	1.10803	1.09307	1.22963	1.25108	1.15895	1.1592	1.19137	1.13848	1.11231
50	34	1	1.11918	1.12211	1.10587	1.09346	1.10355	1.10159	1.09942	1.09115	1.09186	1.09218	1.08831	1.09238	1.17266	1.26756	1.3141	1.28278	1.29536	1.29263	1.14371	1.115	1.10916	1.1855	1.09937	1.09871	1.13116	1.16485	1.16479	1.16243	1.11059	1.12717	1.1542	1.14707	1.21235	1.22949	1.27884	1.25363	1.28682	1.29635	1.32191	1.34392	1.32357	1.38442	1.295	1.22346	1.17483	1.14571	1.15336
51	33	1	1.08061	1.08408	1.11199	1.09066	1.08987	1.11618	1.08175	1.08787	1.08744	1.09852	1.08192	1.14182	1.11992	1.28042	1.27346	1.2319	1.22878	1.24718	1.16755	1.08969	1.08244	1.18509	1.15848	1.15228	1.16598	1.11244	1.15521	1.18111	1.15715	1.16305	1.18782	1.15768	1.16782	1.11446	1.11021	1.17208	1.12395	1.09741	1.09461	1.12133	1.12544	1.12702	1.1237	1.12014	1.12409	1.08576	1.07548
52	34	1	1.15759	1.14468	1.1384	1.13246	1.14704	1.14112	1.16256	1.17679	1.18698	1.22848	1.18281	1.15828	1.26061	1.34174	1.37779	1.3313	1.33266	1.24873	1.2569	1.25376	1.13521	1.16873	1.13414	1.18064	1.15236	1.1996	1.22819	1.30607	1.32472	1.24638	1.30531	1.24677	1.25784	1.24552	1.24685	1.28036	1.33397	1.33236	1.30731	1.30999	1.2896	1.25081	1.13645	1.2492	1.2114	1.16512	1.18618
53	35	1	1.13679	1.11702	1.15337	1.14371	1.12509	1.13945	1.12662	1.14636	1.13011	1.16811	1.15989	1.14991	1.24942	1.28483	1.27421	1.31427	1.26762	1.27324	1.23381	1.22534	1.21162	1.20728	1.18555	1.17612	1.17676	1.17595	1.15304	1.15148	1.15635	1.16894	1.1357	1.12982	1.12886	1.12108	1.12024	1.12871	1.11678	1.11609	1.11879	1.11798	1.12865	1.11939	1.10559	1.10843	1.10518	1.24086	1.22891
54	36	1	1.06176	1.06139	1.06331	1.06314	1.07943	1.07082	1.08701	1.08669	1.08764	1.0847	1.0961	1.07965	1.15484	1.16171	1.14466	1.16716	1.20618	1.19949	1.14115	1.11589	1.12998	1.07774	1.111	1.08706	1.10955	1.10712	1.12754	1.118	1.129	1.16487	1.19378	1.21137	1.20356	1.15996	1.1662	1.1925	1.21461	1.19757	1.22343	1.24412	1.26313	1.28426	1.23412	1.22906	1.16931	1.16443	1.16493
55	37	1	1.10573	1.10819	1.09626	1.09441	1.09616	1.10245	1.09072	1.09099	1.09588	1.09443	1.11563	1.13026	1.25464	1.27854	1.30811	1.29113	1.23451	1.27573	1.21301	1.10105	1.11216	1.10161	1.10187	1.11242	1.11016	1.1578	1.23768	1.21403	1.1253	1.13628	1.11661	1.17978	1.15063	1.10401	1.11802	1.12542	1.11014	1.1167	1.11135	1.2158	1.18697	1.22855	1.17395	1.12758	1.10008	1.19657	1.16227
56	38	1	1.10611	1.09577	1.09907	1.09686	1.09643	1.10547	1.1025	1.08967	1.10431	1.09483	1.08822	1.08713	1.23501	1.25278	1.31234	1.27344	1.27367	1.26606	1.20538	1.11437	1.21808	1.24948	1.20667	1.27198	1.20823	1.21495	1.23147	1.15575	1.33182	1.12623	1.33367	1.32737	1.30628	1.38324	1.37964	1.37922	1.3956	1.34804	1.31957	1.34463	1.32176	1.3045	1.26651	1.24766	1.23316	1.19022	1.17617
57	39	1	1.10811	1.1112	1.1063	1.09655	1.09692	1.09149	1.13141	1.14149	1.22311	1.11561	1.11542	1.08865	1.17098	1.38447	1.09706	1.09751	1.11467	1.1205	1.10405	1.10008	1.11129	1.11415	1.1286	1.16337	1.16042	1.12071	1.12622	1.13619	1.15303	1.17798	1.18546	1.15407	1.17039	1.17145	1.15516	1.12026	1.15186	1.19213	1.1838	1.12497	1.0986	1.13798	1.12225	1.11534	1.11297	1.16053	1.16476
58	40	1	1.11929	1.16005	1.14659	1.10732	1.10801	1.12677	1.14086	1.11384	1.09575	1.11534	1.10468	1.10897	1.18433	1.35562	1.42144	1.31211	1.21536	1.12645	1.11477	1.11533	1.10538	1.10706	1.11724	1.107	1.10258	1.104	1.10364	1.1211	1.10341	1.1043	1.16388	1.20494	1.10915	1.11264	1.12837	1.13525	1.10512	1.16669	1.11522	1.12519	1.12091	1.12664	1.1947	1.10435	1.10154	1.09414	1.10836
59	36	1	1.07945	1.07512	1.08109	1.07916	1.08257	1.0909	1.10089	1.07926	1.09043	1.09839	1.07974	1.07868	1.16867	1.15447	1.16539	1.14254	1.209	1.19987	1.23255	1.16134	1.15099	1.15082	1.17331	1.15594	1.16077	1.20574	1.18213	1.13312	1.17964	1.20896	1.18859	1.19537	1.2139	1.21581	1.24636	1.21906	1.21548	1.25881	1.24891	1.22489	1.21821	1.21219	1.21766	1.18149	1.17242	1.16856	1.14826
60	39	1	1.07221	1.079	1.12175	1.0737	1.07555	1.08266	1.07976	1.09417	1.09265	1.08815	1.08242	1.08993	1.11524	1.11351	1.11228	1.10056	1.12628	1.10906	1.10938	1.10342	1.10085	1.11331	1.12841	1.11391	1.12134	1.14125	1.1976	1.16358	1.1195	1.12181	1.13791	1.11878	1.13926	1.17075	1.13387	1.11836	1.12738	1.16615	1.1339	1.15856	1.21035	1.22851	1.2033	1.20535	1.17038	1.15885	1.15228
61	41	1	1.23133	1.31463	1.12958	1.13847	1.32736	1.13428	1.14376	1.11786	1.11915	1.16139	1.10984	1.11279	1.22842	1.39551	1.39248	1.37817	1.3789	1.36232	1.2687	1.18834	1.13889	1.09251	1.09814	1.08823	1.08874	1.08643	1.08313	1.08008	1.09145	1.12352	1.08238	1.07635	1.07251	1.07624	1.08416	1.08792	1.08408	1.08018	1.1047	1.0747	1.07221	1.09711	1.07719	1.07247	1.07653	1.10634	1.09389
62	42	1	1.13793	1.14387	1.11904	1.16158	1.14689	1.09494	1.11216	1.12183	1.10478	1.08889	1.08154	1.09193	1.29385	1.31836	1.34342	1.25399	1.25944	1.19978	1.11176	1.15997	1.24405	1.20086	1.16659	1.27323	1.32679	1.34518	1.32805	1.33582	1.29667	1.26109	1.22963	1.2477	1.27612	1.28687	1.27316	1.29496	1.32624	1.28934	1.3434	1.32419	1.28762	1.23924	1.31724	1.31506	1.25292	1.22563	1.2527
63	38	1	1.13258	1.16882	1.09216	1.10404	1.10321	1.10688	1.1489	1.15348	1.1177	1.16201	1.09989	1.11312	1.21017	1.26387	1.29167	1.272	1.25055	1.22045	1.19807	1.1733	1.17998	1.14545	1.11527	1.12502	1.12576	1.12597	1.1279	1.14559	1.18451	1.19534	1.27004	1.21305	1.14301	1.13806	1.20497	1.21189	1.2099	1.28724	1.23168	1.27316	1.23923	1.23389	1.16627	1.21856	1.21059	1.24031	1.31326
64	43	1	1.11834	1.08462	1.09507	1.08946	1.08406	1.07387	1.07767	1.07887	1.07253	1.0751	1.06695	1.05931	1.14659	1.27496	1.26111	1.17074	1.25232	1.09983	1.09315	1.07825	1.09909	1.08845	1.10704	1.11013	1.22983	1.12351	1.09027	1.09058	1.10339	1.08681	1.07756	1.09207	1.11708	1.12738	1.08999	1.12967	1.11105	1.12444	1.14293	1.17904	1.18869	1.13918	1.11824	1.13369	1.14716	1.18994	1.13362
65	44	1	1.20058	1.18964	1.15519	1.14553	1.16549	1.15153	1.13577	1.14307	1.145	1.14117	1.14555	1.16632	1.25752	1.32997	1.33705	1.34267	1.28838	1.29326	1.25383	1.26026	1.28217	1.28274	1.24527	1.2473	1.22902	1.22368	1.21848	1.19593	1.1999	1.19278	1.18144	1.17338	1.1559	1.15643	1.15196	1.1501	1.15926	1.15018	1.14152	1.14778	1.14912	1.14313	1.14553	1.13261	1.13345	1.12792	1.11396
66	45	1	1.11362	1.10381	1.09329	1.0949	1.1087	1.08961	1.10105	1.12437	1.09514	1.09145	1.08964	1.0856	1.30342	1.34032	1.37759	1.35265	1.34675	1.28321	1.25363	1.11414	1.0996	1.09741	1.0954	1.10475	1.09008	1.09719	1.10726	1.0874	1.13052	1.09108	1.10043	1.09038	1.17392	1.11456	1.1049	1.10306	1.09351	1.09293	1.09306	1.09568	1.09819	1.09162	1.11172	1.09437	1.09136	1.13026	1.13089
67	46	1	1.10133	1.096	1.08956	1.09341	1.09771	1.0996	1.10184	1.11416	1.11509	1.09893	1.11508	1.13175	1.40691	1.37321	1.38564	1.34452	1.2653	1.16124	1.19109	1.20617	1.14383	1.21729	1.1336	1.13762	1.23776	1.2399	1.30019	1.33185	1.33809	1.38461	1.43366	1.35023	1.31803	1.38024	1.36945	1.35417	1.32027	1.37283	1.35636	1.38202	1.36745	1.33186	1.32504	1.23438	1.19797	1.29512	1.25171
68	47	1	1.15509	1.11288	1.11364	1.16519	1.15447	1.13998	1.13154	1.07704	1.09026	1.09233	1.09327	1.10696	1.17152	1.2869	1.3212	1.28823	1.34799	1.2492	1.32202	1.2885	1.22192	1.18324	1.27544	1.26587	1.3271	1.29114	1.27526	1.26837	1.16698	1.19496	1.17709	1.10574	1.16603	1.15286	1.17077	1.22283	1.11395	1.09581	1.09843	1.18541	1.11708	1.10337	1.09551	1.10231	1.10391	1.2112	1.22474
69	44	1	1.2422	1.29327	1.25251	1.2241	1.20755	1.21143	1.21205	1.21508	1.21442	1.23233	1.24713	1.24858	1.37267	1.44962	1.4799	1.47659	1.40779	1.36249	1.3619	1.31159	1.27611	1.28724	1.27586	1.26429	1.25325	1.26104	1.26715	1.26146	1.25277	1.24061	1.23913	1.23778	1.21842	1.22295	1.20818	1.20534	1.21018	1.19655	1.2025	1.1927	1.1913	1.18615	1.17607	1.16697	1.16626	1.11629	1.10383
70	48	1	1.08917	1.09589	1.07779	1.08044	1.08074	1.20345	1.19349	1.11552	1.07504	1.11463	1.0722	1.07787	1.26482	1.34932	1.33364	1.29696	1.26431	1.16228	1.16487	1.17671	1.19734	1.12692	1.12069	1.1302	1.17858	1.16059	1.16475	1.17701	1.1528	1.1565	1.17705	1.17797	1.18252	1.2042	1.23387	1.18789	1.17597	1.2024	1.17215	1.15416	1.13865	1.17178	1.18527	1.15494	1.15018	1.21826	1.2036
71	45	1	1.08869	1.08215	1.09206	1.08272	1.08111	1.07235	1.06944	1.06873	1.09394	1.13785	1.09162	1.09109	1.2223	1.32812	1.34904	1.35279	1.33346	1.30824	1.29163	1.2889	1.09743	1.095	1.10346	1.09202	1.12675	1.0989	1.09856	1.09921	1.14126	1.11314	1.11117	1.11279	1.10823	1.12124	1.10417	1.1018	1.09932	1.10733	1.10878	1.15877	1.14538	1.13253	1.1643	1.12207	1.10146	1.10945	1.09606
72	49	1	1.07398	1.06621	1.06296	1.06566	1.06606	1.06403	1.08179	1.07256	1.07803	1.07527	1.12087	1.07798	1.15199	1.25482	1.16589	1.27364	1.24845	1.25023	1.21031	1.20833	1.1825	1.18252	1.16784	1.10909	1.10198	1.13455	1.15995	1.14578	1.11252	1.14827	1.12307	1.14115	1.15957	1.128	1.17614	1.15701	1.14869	1.15063	1.14652	1.1774	1.14835	1.13697	1.13699	1.15447	1.1722	1.12473	1.12278
73	50	1	1.12732	1.11791	1.12155	1.12661	1.12306	1.16491	1.12269	1.19203	1.11213	1.11609	1.12798	1.13742	1.25105	1.28631	1.29863	1.21522	1.19087	1.17879	1.19133	1.21423	1.19934	1.17844	1.16228	1.16468	1.14905	1.15027	1.13426	1.13038	1.12582	1.12664	1.11854	1.1243	1.11961	1.12304	1.1177	1.1227	1.1176	1.10026	1.10614	1.09252	1.10028	1.10332	1.08991	1.09296	1.10058	1.28506	1.25899
74	49	1	1.07302	1.08262	1.09836	1.09931	1.07834	1.07607	1.0668	1.0724	1.07143	1.0692	1.06825	1.07448	1.10009	1.11256	1.10711	1.09674	1.09199	1.08941	1.09022	1.09169	1.10513	1.11833	1.11106	1.11608	1.11762	1.15904	1.14294	1.19184	1.11229	1.10421	1.14307	1.17568	1.14016	1.12839	1.14224	1.14723	1.13052	1.14743	1.13446	1.16898	1.19073	1.16059	1.16322	1.11717	1.1521	1.1777	1.17689
75	51	1	1.18122	1.16245	1.17655	1.16179	1.16596	1.16206	1.14371	1.12675	1.11431	1.10692	1.14469	1.12131	1.29545	1.35144	1.35206	1.28374	1.33092	1.3247	1.24728	1.14671	1.1325	1.1316	1.1297	1.12498	1.11702	1.12292	1.1136	1.12461	1.12254	1.14825	1.14932	1.15054	1.12273	1.13457	1.13842	1.16034	1.13568	1.24795	1.12285	1.15035	1.14421	1.19086	1.16761	1.18021	1.24342	1.15506	1.12478
76	52	1	1.10799	1.09163	1.09247	1.08859	1.09165	1.08461	1.08607	1.11449	1.08293	1.0885	1.1036	1.08642	1.26731	1.30881	1.37014	1.31828	1.30605	1.29817	1.24087	1.26936	1.23566	1.17016	1.14902	1.10012	1.107	1.12548	1.14709	1.18108	1.2197	1.19031	1.26949	1.24614	1.34657	1.36173	1.37578	1.41333	1.41297	1.43953	1.33862	1.3708	1.32192	1.33168	1.30228	1.38395	1.25486	1.19708	1.17036
77	53	1	1.12531	1.1065	1.09229	1.09622	1.08734	1.0847	1.08776	1.10335	1.08283	1.11188	1.1168	1.09722	1.25688	1.25207	1.34998	1.23991	1.20457	1.20696	1.22488	1.20851	1.19468	1.21597	1.23961	1.25363	1.25792	1.26923	1.28687	1.37158	1.41938	1.45819	1.46445	1.46284	1.47057	1.5082	1.51067	1.51619	1.51851	1.55426	1.56835	1.60134	1.55081	1.57176	1.59439	1.59081	1.57579	1.16593	1.16379
78	53	1	1.14827	1.12876	1.12582	1.1239	1.12604	1.147	1.12589	1.10318	1.09784	1.10918	1.1763	1.1582	1.36629	1.45073	1.44143	1.45644	1.39996	1.28132	1.31419	1.29314	1.26251	1.17163	1.16886	1.28272	1.22097	1.2683	1.22698	1.24703	1.22411	1.17661	1.21807	1.13877	1.1402	1.12251	1.15204	1.16331	1.16409	1.14265	1.1422	1.14526	1.1358	1.12706	1.12453	1.1369	1.14425	1.30393	1.30226
79	52	1	1.11752	1.08965	1.0845	1.08037	1.08404	1.07452	1.0733	1.07261	1.10621	1.07238	1.07481	1.07864	1.17101	1.17764	1.20317	1.15227	1.16972	1.1758	1.15461	1.12557	1.09439	1.14523	1.12463	1.11609	1.19577	1.2091	1.16781	1.19308	1.20445	1.26706	1.2874	1.25278	1.26963	1.2879	1.29941	1.3056	1.30297	1.32168	1.31011	1.32654	1.28965	1.25266	1.23022	1.24947	1.21488	1.16771	1.14256
80	54	1	1.1207	1.08077	1.08288	1.09873	1.12144	1.08285	1.0916	1.07536	1.09771	1.19531	1.23801	1.28429	1.33155	1.387	1.45933	1.38213	1.4033	1.25573	1.26146	1.17107	1.11057	1.13959	1.20571	1.22859	1.19487	1.19934	1.16007	1.15677	1.14591	1.15117	1.22712	1.1571	1.15432	1.21009	1.08523	1.15531	1.16633	1.0953	1.09208	1.08825	1.10879	1.10131	1.11042	1.11885	1.26149	1.18656	1.18234
81	55	1	1.07624	1.07801	1.08737	1.1162	1.10228	1.08589	1.09217	1.07618	1.0854	1.06709	1.06876	1.06418	1.2572	1.3206	1.30357	1.28511	1.22995	1.09804	1.21888	1.12122	1.12131	1.11523	1.09474	1.11795	1.15795	1.12125	1.08888	1.10286	1.09156	1.11406	1.09626	1.06553	1.12412	1.1465	1.13786	1.11149	1.08671	1.11249	1.09078	1.12016	1.1482	1.08733	1.10585	1.16203	1.09942	1.18425	1.20235
82	56	2	1.0829	1.07631	1.08346	1.06482	1.07631	1.06923	1.07553	1.06723	1.06252	1.06574	1.06489	1.06506	1.0658	1.24842	1.24274	1.21597	1.22563	1.1198	1.07457	1.09674	1.06911	1.07449	1.07416	1.08453	1.08393	1.08689	1.09517	1.09053	1.09374	1.08837	1.08637	1.08831	1.10898	1.14	1.14917	1.14357	1.11728	1.08965	1.1657	1.07386	1.09117	1.08019	1.09933	1.08283	1.07408	1.1706	1.1397
83	57	2	1.06732	1.07287	1.07519	1.07052	1.07382	1.0785	1.06833	1.0815	1.0794	1.09546	1.08314	1.08046	1.08449	1.30683	1.31587	1.34562	1.3615	1.24834	1.24351	1.15803	1.11825	1.1449	1.12044	1.11796	1.13189	1.18359	1.19621	1.11575	1.12309	1.18815	1.09164	1.09865	1.17162	1.1422	1.10293	1.11934	1.13165	1.14028	1.19835	1.15556	1.10527	1.10072	1.1042	1.11852	1.10657	1.14757	1.15041
84	58	2	1.13117	1.14394	1.11272	1.14557	1.10932	1.10149	1.09832	1.09881	1.09601	1.09302	1.10194	1.11275	1.11296	1.3147	1.34674	1.34137	1.14411	1.18629	1.13582	1.12143	1.13804	1.11746	1.12427	1.11655	1.11218	1.11605	1.14474	1.14444	1.11942	1.12792	1.11933	1.17777	1.18956	1.23471	1.1393	1.17396	1.14173	1.18675	1.12075	1.16524	1.12963	1.13258	1.16952	1.12344	1.11113	1.25167	1.23513
85	59	2	1.07899	1.07688	1.07781	1.07287	1.07549	1.07359	1.06765	1.09169	1.0737	1.0829	1.06398	1.06524	1.06987	1.19775	1.23612	1.25314	1.22207	1.21873	1.19677	1.18463	1.15653	1.17159	1.13123	1.12256	1.07845	1.08091	1.1036	1.08931	1.16781	1.07844	1.14517	1.133	1.10561	1.23318	1.09773	1.24367	1.22491	1.25305	1.16824	1.17716	1.13376	1.14578	1.13266	1.1473	1.11376	1.165	1.16496
86	57	2	1.08443	1.07909	1.08303	1.06561	1.0682	1.081	1.08018	1.07891	1.07982	1.07778	1.08054	1.10509	1.09888	1.28281	1.28186	1.27395	1.27119	1.22061	1.13928	1.22369	1.15144	1.10631	1.11378	1.10594	1.09877	1.17302	1.11171	1.11501	1.12418	1.16752	1.12562	1.22624	1.20075	1.27185	1.23816	1.25525	1.18777	1.21539	1.16446	1.18639	1.15197	1.2306	1.18713	1.11379	1.11194	1.1874	1.15331
87	60	2	1.10595	1.09645	1.09149	1.09368	1.08723	1.08572	1.08877	1.08398	1.09299	1.08406	1.09058	1.08184	1.08056	1.32553	1.37265	1.39428	1.41425	1.34168	1.18476	1.09228	1.09499	1.08762	1.08968	1.0844	1.08508	1.09624	1.15643	1.0925	1.10989	1.10841	1.1212	1.16198	1.32735	1.17262	1.28944	1.39985	1.36595	1.22532	1.33239	1.28538	1.33152	1.13438	1.16451	1.26296	1.15028	1.20296	1.17589
88	61	2	1.07822	1.08737	1.07771	1.08676	1.07814	1.08011	1.07956	1.07254	1.07282	1.09681	1.08326	1.06549	1.07056	1.28251	1.31579	1.3416	1.30996	1.20047	1.18737	1.11971	1.08651	1.10112	1.08643	1.08572	1.08606	1.13914	1.08878	1.14755	1.18478	1.078	1.08323	1.07115	1.06674	1.07166	1.07036	1.10657	1.06914	1.16273	1.07771	1.20561	1.18895	1.16039	1.10957	1.06837	1.07436	1.13133	1.17778
89	56	2	1.09435	1.09275	1.07059	1.07351	1.09341	1.09434	1.0918	1.0923	1.09971	1.08984	1.10945	1.12345	1.08459	1.27725	1.37854	1.36425	1.35511	1.29292	1.2094	1.11422	1.13568	1.14663	1.10291	1.11568	1.16613	1.22398	1.10551	1.09965	1.11357	1.13695	1.11359	1.13742	1.11276	1.10705	1.10703	1.11819	1.19038	1.13327	1.20864	1.14539	1.22096	1.20492	1.26328	1.2545	1.30592	1.14752	1.16547
90	62	2	1.10761	1.10858	1.09164	1.08521	1.08964	1.09505	1.10021	1.09508	1.09729	1.08973	1.08263	1.08178	1.07285	1.3127	1.3353	1.32957	1.3148	1.13121	1.16721	1.13366	1.18294	1.21941	1.08801	1.08473	1.09741	1.09803	1.1978	1.10322	1.10645	1.10724	1.10562	1.10353	1.09575	1.11369	1.11374	1.14868	1.10501	1.11762	1.09507	1.1223	1.25284	1.2402	1.21256	1.12711	1.10751	1.28355	1.2331
91	63	2	1.09036	1.08145	1.07949	1.08268	1.07894	1.09018	1.07815	1.07718	1.07625	1.07576	1.07067	1.07655	1.07778	1.23769	1.24436	1.24259	1.21884	1.14528	1.10095	1.10235	1.0906	1.10752	1.09223	1.08833	1.08785	1.08605	1.09569	1.11488	1.09945	1.11124	1.08974	1.1008	1.10311	1.1235	1.11602	1.11909	1.08306	1.0923	1.11597	1.20703	1.14622	1.1179	1.08749	1.10432	1.08744	1.2073	1.19736
92	64	2	1.13315	1.10847	1.12271	1.10535	1.14593	1.12696	1.10125	1.10525	1.0939	1.09867	1.09068	1.09839	1.11689	1.33111	1.38629	1.35992	1.38606	1.30309	1.23791	1.26651	1.26966	1.21725	1.20437	1.20046	1.1951	1.18954	1.23846	1.1549	1.19432	1.21598	1.20368	1.25359	1.18755	1.14393	1.17055	1.18415	1.21929	1.19892	1.17002	1.19296	1.13174	1.14874	1.20166	1.20641	1.17043	1.19389	1.177
93	65	2	1.12682	1.1338	1.10733	1.09913	1.09737	1.11263	1.08975	1.09706	1.09587	1.10255	1.1036	1.10368	1.10994	1.34137	1.37504	1.39452	1.34889	1.22474	1.15595	1.13409	1.16953	1.13635	1.12594	1.16489	1.16111	1.17399	1.11238	1.12707	1.11401	1.14946	1.09651	1.10443	1.10555	1.11278	1.09712	1.09914	1.10113	1.14106	1.09897	1.10583	1.11145	1.09546	1.10897	1.09873	1.10163	1.26808	1.25908
94	63	2	1.09708	1.0768	1.08193	1.07541	1.07055	1.10136	1.08291	1.07073	1.06647	1.06546	1.06633	1.07187	1.07666	1.24479	1.29326	1.30603	1.12205	1.0917	1.08743	1.1077	1.15549	1.07333	1.07966	1.17989	1.07887	1.077	1.08617	1.10227	1.08005	1.08978	1.0816	1.10814	1.09955	1.12186	1.09737	1.16869	1.10317	1.17017	1.1088	1.1024	1.17634	1.15225	1.23462	1.11663	1.11341	1.18084	1.137
95	66	2	1.11367	1.09724	1.08589	1.0804	1.08264	1.08292	1.0808	1.0863	1.08702	1.10347	1.07644	1.08946	1.08366	1.31747	1.40331	1.40686	1.32596	1.23121	1.22542	1.15276	1.0975	1.09682	1.09516	1.11442	1.1689	1.1211	1.15059	1.13314	1.13245	1.25097	1.207	1.25562	1.15943	1.11815	1.11028	1.12858	1.17208	1.21115	1.17671	1.18268	1.17586	1.1121	1.1258	1.11014	1.11368	1.18044	1.18756
96	67	2	1.13811	1.1216	1.11855	1.11611	1.10505	1.1254	1.11695	1.13587	1.11233	1.11759	1.10968	1.09985	1.09352	1.326	1.36336	1.35287	1.29672	1.28435	1.19617	1.23655	1.30022	1.31869	1.40287	1.32649	1.24761	1.29784	1.3301	1.27674	1.36659	1.40813	1.42402	1.42607	1.47612	1.48265	1.49032	1.47165	1.46538	1.48276	1.40217	1.37787	1.33712	1.30485	1.24551	1.30707	1.28351	1.23822	1.22101
97	68	2	1.10971	1.10765	1.10937	1.10136	1.09634	1.10772	1.0996	1.09822	1.10184	1.10325	1.10786	1.1193	1.11478	1.4216	1.43598	1.39217	1.3521	1.1972	1.35707	1.2193	1.2629	1.13723	1.21713	1.23293	1.27455	1.28688	1.32296	1.30531	1.30896	1.32903	1.34562	1.42616	1.32262	1.30262	1.34033	1.40704	1.28267	1.38368	1.37872	1.44707	1.51976	1.41419	1.52556	1.42603	1.41571	1.2381	1.2246
98	69	2	1.0972	1.08489	1.08473	1.09003	1.09497	1.07592	1.07099	1.08578	1.08531	1.086	1.08564	1.0844	1.0843	1.40072	1.42786	1.45693	1.40682	1.2768	1.15025	1.10053	1.09824	1.12914	1.14238	1.11733	1.09624	1.16801	1.1842	1.19865	1.13055	1.10119	1.1249	1.11152	1.12118	1.12189	1.11485	1.13349	1.13928	1.18147	1.14051	1.11033	1.21589	1.17562	1.27168	1.23797	1.12809	1.15627	1.143
99	69	2	1.10327	1.07571	1.05692	1.05366	1.05273	1.05552	1.05206	1.04659	1.06849	1.06527	1.06966	1.0741	1.07573	1.07745	1.08177	1.08545	1.07663	1.07945	1.08631	1.09064	1.10269	1.1042	1.13118	1.12448	1.10939	1.1221	1.11138	1.10601	1.11036	1.12511	1.12896	1.13712	1.14114	1.13486	1.13604	1.12984	1.13228	1.13542	1.13198	1.15557	1.15786	1.16913	1.14867	1.13886	1.13079	1.25294	1.16894
100	70	2	1.12069	1.11261	1.11538	1.11379	1.10097	1.09454	1.11039	1.19335	1.26157	1.19474	1.127	1.10524	1.10278	1.32337	1.40707	1.27712	1.2504	1.27154	1.18446	1.17287	1.17777	1.13555	1.14208	1.15757	1.28708	1.30659	1.26985	1.23261	1.27801	1.2301	1.23389	1.21589	1.23806	1.31888	1.2132	1.22236	1.24553	1.18907	1.17858	1.23615	1.21203	1.2014	1.19921	1.15992	1.16953	1.26246	1.22776
101	71	2	1.1209	1.11532	1.10029	1.10032	1.09752	1.08698	1.09488	1.10223	1.09709	1.10346	1.09828	1.0979	1.09948	1.35279	1.33077	1.29146	1.30913	1.24293	1.11835	1.1082	1.16289	1.18357	1.11416	1.11979	1.11024	1.12286	1.12544	1.16821	1.13549	1.12351	1.12648	1.11554	1.16157	1.22721	1.17323	1.17763	1.24665	1.30023	1.30251	1.29078	1.24109	1.24641	1.26613	1.11048	1.20956	1.20795	1.20368
102	72	2	1.07387	1.0723	1.08638	1.06871	1.068	1.06667	1.06604	1.06537	1.0668	1.06956	1.05984	1.06352	1.10661	1.30513	1.33475	1.22751	1.21516	1.14242	1.08744	1.08155	1.08999	1.07765	1.0937	1.07738	1.16812	1.10406	1.15442	1.1766	1.22797	1.2131	1.23408	1.23662	1.19975	1.18592	1.16589	1.22203	1.1847	1.14642	1.12983	1.23724	1.21097	1.22817	1.30083	1.23158	1.16255	1.16348	1.15568
103	73	2	1.08776	1.0876	1.09029	1.08848	1.09289	1.09082	1.10226	1.10528	1.10709	1.10744	1.10684	1.10051	1.09751	1.28062	1.30645	1.31875	1.2258	1.13595	1.16141	1.11069	1.09653	1.10569	1.11341	1.08905	1.08757	1.09035	1.08634	1.09367	1.08265	1.0862	1.08722	1.09243	1.09875	1.13342	1.0969	1.10393	1.09316	1.08894	1.08906	1.08354	1.17349	1.1407	1.152	1.07876	1.09179	1.18044	1.17145
104	74	2	1.12235	1.11214	1.11641	1.1139	1.10804	1.08949	1.10933	1.10383	1.09555	1.09401	1.08827	1.10358	1.09508	1.42966	1.47456	1.26181	1.39322	1.23279	1.10762	1.12943	1.09961	1.10984	1.09878	1.11339	1.14579	1.13737	1.1005	1.08313	1.08237	1.07587	1.08844	1.11321	1.09428	1.10035	1.12624	1.09123	1.09267	1.17967	1.20437	1.23502	1.31162	1.1752	1.22639	1.15169	1.11745	1.29227	1.27477
105	72	2	1.09063	1.08942	1.08764	1.0951	1.08681	1.13378	1.08973	1.09418	1.09192	1.15214	1.08787	1.08057	1.11957	1.35394	1.39273	1.29159	1.25586	1.21635	1.14366	1.13168	1.19479	1.19394	1.18474	1.12965	1.22522	1.23686	1.18059	1.17153	1.16269	1.12398	1.21897	1.21865	1.2175	1.18265	1.21856	1.23393	1.27033	1.27242	1.2453	1.37468	1.3891	1.37357	1.39257	1.34656	1.35795	1.19948	1.18624
106	75	2	1.0852	1.07745	1.07872	1.07258	1.07666	1.06904	1.07604	1.08367	1.07645	1.07822	1.09852	1.09222	1.13964	1.34929	1.36686	1.32624	1.24146	1.20512	1.14349	1.1346	1.15682	1.13021	1.18855	1.20305	1.22039	1.20488	1.1827	1.27727	1.3056	1.36176	1.36457	1.33856	1.31058	1.35863	1.39245	1.40686	1.36642	1.27861	1.2908	1.25728	1.25324	1.22629	1.23083	1.16851	1.20347	1.15717	1.14181
107	75	2	1.0949	1.09534	1.08563	1.08329	1.08923	1.08291	1.09063	1.09158	1.08949	1.09686	1.12376	1.09973	1.10098	1.423	1.46413	1.3996	1.32705	1.25009	1.19395	1.17581	1.21912	1.13403	1.22239	1.26427	1.25913	1.36857	1.43998	1.50743	1.52396	1.53639	1.49455	1.40017	1.49465	1.51467	1.54159	1.55564	1.52919	1.45364	1.41479	1.39188	1.37371	1.35149	1.31822	1.31191	1.26821	1.2049	1.18115
108	76	2	1.07745	1.08553	1.08779	1.10972	1.10976	1.09686	1.0974	1.10884	1.14872	1.10955	1.10371	1.09442	1.08591	1.32994	1.38923	1.36931	1.36556	1.33819	1.28688	1.25264	1.18909	1.09957	1.1164	1.08	1.08612	1.0967	1.10379	1.12812	1.11882	1.11722	1.11424	1.10964	1.15584	1.10971	1.08948	1.10149	1.11424	1.11517	1.10363	1.11861	1.18531	1.13124	1.11416	1.12546	1.09865	1.20957	1.23601
109	77	2	1.08352	1.08175	1.08285	1.08643	1.08671	1.09649	1.10028	1.10717	1.10412	1.09396	1.10997	1.09884	1.08596	1.11898	1.14997	1.13445	1.21131	1.12815	1.11624	1.12085	1.11742	1.13223	1.14361	1.13321	1.11928	1.12553	1.13864	1.14221	1.11761	1.10367	1.09794	1.08586	1.10265	1.08714	1.10451	1.08372	1.09757	1.10561	1.09766	1.12102	1.14418	1.11957	1.10506	1.0984	1.08522	1.20314	1.20374
110	76	2	1.12619	1.11811	1.10865	1.08479	1.09156	1.07937	1.0727	1.07389	1.07563	1.06797	1.07233	1.0689	1.07554	1.29598	1.27331	1.35044	1.29173	1.1824	1.13071	1.09008	1.08476	1.07676	1.0857	1.08003	1.0888	1.09823	1.11256	1.24833	1.09151	1.09381	1.09901	1.09822	1.0883	1.12631	1.15059	1.08205	1.08771	1.07653	1.1066	1.13311	1.13934	1.10169	1.12407	1.11812	1.08185	1.1191	1.14106
111	78	2	1.08504	1.08975	1.0846	1.10365	1.09402	1.07027	1.09149	1.09409	1.10397	1.11123	1.10324	1.1028	1.1028	1.1301	1.16304	1.18888	1.17435	1.20848	1.15055	1.14081	1.12994	1.14061	1.12581	1.13979	1.12707	1.12141	1.13164	1.13155	1.12559	1.12562	1.12376	1.12024	1.12	1.11996	1.10624	1.11558	1.11931	1.11357	1.11116	1.10169	1.10475	1.09721	1.10979	1.10012	1.10941	1.18209	1.19187
112	79	2	1.11633	1.11416	1.0996	1.10432	1.10874	1.10459	1.09805	1.10263	1.10187	1.10078	1.10038	1.09597	1.0994	1.2345	1.26047	1.26081	1.28793	1.21422	1.14379	1.1339	1.1507	1.12946	1.1418	1.13033	1.14719	1.13408	1.16878	1.17371	1.1748	1.15981	1.18523	1.28607	1.312	1.3529	1.40333	1.39372	1.45298	1.4384	1.4291	1.44635	1.37042	1.41605	1.31986	1.32523	1.30798	1.25352	1.24919
113	77	2	1.08969	1.09657	1.09117	1.09714	1.11144	1.08463	1.08531	1.08895	1.08482	1.08911	1.0906	1.10057	1.08746	1.31794	1.33557	1.3317	1.21017	1.11389	1.09984	1.14337	1.10305	1.10324	1.11415	1.15395	1.15041	1.1493	1.16678	1.13874	1.15212	1.14274	1.1514	1.15862	1.17542	1.16286	1.184	1.28562	1.2444	1.16002	1.25769	1.19045	1.16636	1.14783	1.22886	1.1829	1.13364	1.18396	1.17314
114	80	2	1.10346	1.09719	1.0913	1.09632	1.09245	1.08918	1.08694	1.08795	1.08824	1.08639	1.0844	1.0801	1.08375	1.30989	1.31772	1.18006	1.31161	1.23802	1.22575	1.23996	1.20004	1.26841	1.2458	1.26294	1.17153	1.24796	1.28178	1.32061	1.2811	1.27877	1.30376	1.30115	1.31257	1.29958	1.27676	1.26475	1.2266	1.21867	1.17401	1.19363	1.19167	1.17322	1.17182	1.18208	1.17626	1.2068	1.20545
115	81	2	1.07639	1.07147	1.07662	1.07918	1.08058	1.08982	1.08422	1.08039	1.09749	1.08374	1.06943	1.09005	1.06822	1.07988	1.12288	1.21052	1.20673	1.07513	1.06792	1.07191	1.072	1.07641	1.07089	1.07818	1.07911	1.08507	1.08075	1.07287	1.07046	1.07747	1.07837	1.1032	1.07359	1.07491	1.08045	1.06901	1.07306	1.06923	1.06736	1.07908	1.07317	1.07147	1.06797	1.06857	1.0701	1.21686	1.21076
116	82	2	1.11598	1.10714	1.09598	1.07698	1.08719	1.08224	1.08699	1.07747	1.07078	1.0955	1.08191	1.07418	1.06888	1.10347	1.08723	1.09956	1.09234	1.09369	1.08344	1.07581	1.07291	1.08254	1.1463	1.10202	1.08745	1.09849	1.0915	1.09575	1.0819	1.11349	1.10092	1.17337	1.14725	1.19337	1.09908	1.12102	1.38973	1.34624	1.31721	1.34272	1.34577	1.35262	1.31856	1.34069	1.28422	1.33156	1.32067
117	81	2	1.09096	1.08194	1.08678	1.08225	1.07956	1.07614	1.07854	1.07807	1.08237	1.07011	1.07391	1.08401	1.0871	1.34439	1.31422	1.19927	1.17502	1.11161	1.06668	1.07471	1.07143	1.09125	1.06901	1.09455	1.09422	1.07966	1.08474	1.09316	1.10627	1.10419	1.11849	1.12704	1.12493	1.18738	1.23938	1.27594	1.17189	1.1521	1.16012	1.15338	1.09608	1.07964	1.08541	1.09553	1.09757	1.17347	1.13973
118	83	2	1.08686	1.0874	1.07641	1.07207	1.07061	1.06878	1.07189	1.07146	1.06966	1.06955	1.067	1.07041	1.08037	1.30849	1.32102	1.30162	1.31408	1.22838	1.14306	1.19275	1.0843	1.10347	1.10721	1.11032	1.08729	1.08814	1.089	1.08922	1.11333	1.11227	1.21664	1.23338	1.17469	1.11261	1.22152	1.29918	1.09983	1.17631	1.15251	1.10591	1.17531	1.22412	1.14339	1.12091	1.22244	1.16199	1.13934
119	84	2	1.1149	1.08742	1.11006	1.09556	1.08589	1.08233	1.08308	1.12431	1.1159	1.08037	1.08442	1.08136	1.10158	1.29219	1.30254	1.33656	1.32749	1.23124	1.26124	1.10364	1.10733	1.10698	1.09684	1.11809	1.0973	1.1042	1.13059	1.10188	1.09092	1.10179	1.09642	1.09408	1.08576	1.09913	1.18171	1.16819	1.09335	1.1028	1.09633	1.12894	1.09305	1.08586	1.11331	1.1305	1.09631	1.11922	1.13909
120	85	2	1.1132	1.10278	1.10133	1.1005	1.09948	1.11528	1.19189	1.09723	1.09965	1.09186	1.08927	1.08685	1.10787	1.35506	1.27899	1.3255	1.18497	1.29717	1.26194	1.12104	1.13595	1.12457	1.14738	1.16866	1.14184	1.24369	1.16083	1.12441	1.13468	1.178	1.22686	1.2216	1.28147	1.32679	1.36741	1.24596	1.3347	1.32918	1.31921	1.35127	1.3014	1.31932	1.40972	1.46586	1.38336	1.26568	1.22967
121	86	2	1.08778	1.07785	1.08168	1.08673	1.08013	1.08454	1.08422	1.07598	1.08306	1.07745	1.08024	1.08881	1.12565	1.32476	1.34277	1.35498	1.31087	1.27242	1.15676	1.19806	1.18136	1.2108	1.2683	1.20699	1.13267	1.14375	1.14779	1.13523	1.10412	1.10879	1.10954	1.10905	1.11269	1.11718	1.11272	1.11654	1.12911	1.19966	1.13174	1.14194	1.18569	1.23829	1.2553	1.19576	1.18017	1.26804	1.2574
122	87	2	1.11269	1.10485	1.09636	1.12905	1.09488	1.08374	1.08638	1.09282	1.09695	1.09769	1.10596	1.09819	1.11466	1.22995	1.26656	1.2159	1.24699	1.24345	1.20783	1.29751	1.26833	1.21195	1.23104	1.11079	1.09507	1.09771	1.09312	1.10223	1.12034	1.12097	1.14433	1.19707	1.1392	1.1989	1.20226	1.18233	1.185	1.16651	1.16919	1.15004	1.16648	1.1405	1.15856	1.14638	1.15108	1.21102	1.19064
123	88	2	1.08197	1.0788	1.07496	1.07475	1.07422	1.07083	1.07336	1.07242	1.08299	1.07907	1.08149	1.08333	1.10121	1.25707	1.26057	1.29363	1.21837	1.10485	1.11147	1.10187	1.11642	1.09419	1.10256	1.12025	1.11503	1.11965	1.13765	1.14037	1.15093	1.16766	1.15663	1.18114	1.21331	1.18387	1.17819	1.1708	1.16857	1.16318	1.16385	1.14058	1.14863	1.13036	1.13165	1.12688	1.1186	1.1794	1.16205
124	89	2	1.08876	1.08964	1.09365	1.08814	1.0814	1.08237	1.08259	1.08104	1.08187	1.08878	1.08884	1.0904	1.11323	1.27757	1.28284	1.31496	1.23687	1.20045	1.17956	1.12189	1.15437	1.14309	1.18292	1.15665	1.20984	1.24586	1.23738	1.23311	1.1556	1.15057	1.2272	1.1705	1.13208	1.15586	1.12044	1.1257	1.13443	1.13568	1.13499	1.13832	1.21344	1.22502	1.19029	1.20187	1.19811	1.20793	1.18797
125	90	2	1.09351	1.08757	1.09382	1.09419	1.09443	1.08979	1.10782	1.08807	1.09635	1.08803	1.10152	1.09624	1.10074	1.23236	1.30497	1.29302	1.25469	1.25793	1.21781	1.12754	1.10469	1.14535	1.16074	1.1107	1.19706	1.17356	1.21852	1.25984	1.21226	1.22138	1.24346	1.29121	1.21493	1.23428	1.14909	1.16464	1.17538	1.22493	1.1999	1.28296	1.20397	1.16037	1.19037	1.15868	1.17668	1.24559	1.22955
126	91	2	1.10042	1.09268	1.09546	1.08943	1.09076	1.08207	1.09313	1.10729	1.10819	1.15527	1.08531	1.08806	1.1596	1.31252	1.11208	1.37776	1.34833	1.32844	1.31156	1.2007	1.26428	1.25714	1.20351	1.18629	1.16596	1.16007	1.197	1.19085	1.20873	1.22565	1.20962	1.21062	1.20213	1.1768	1.18293	1.16982	1.15661	1.15535	1.14432	1.14449	1.14516	1.139	1.13058	1.13272	1.13118	1.19743	1.19174
127	88	2	1.09397	1.09877	1.098	1.09305	1.08999	1.08694	1.08805	1.08576	1.08119	1.08025	1.07716	1.08182	1.09501	1.34651	1.31011	1.33421	1.28498	1.16834	1.11213	1.1015	1.23059	1.0993	1.10383	1.10985	1.10757	1.103	1.11138	1.12012	1.13814	1.17599	1.1669	1.1034	1.09226	1.09767	1.0964	1.09177	1.12155	1.12657	1.13399	1.13437	1.13201	1.12113	1.09148	1.09421	1.09477	1.20285	1.18522
128	92	2	1.10863	1.09289	1.08385	1.0844	1.0792	1.0841	1.08794	1.08823	1.0812	1.08506	1.08613	1.08762	1.14829	1.30477	1.32022	1.23252	1.21171	1.22704	1.14426	1.20327	1.16488	1.14666	1.12102	1.14355	1.12031	1.10215	1.10188	1.09446	1.10802	1.15096	1.10305	1.08917	1.09668	1.10487	1.09645	1.09767	1.09268	1.11843	1.11069	1.20953	1.12024	1.17624	1.17808	1.1831	1.19422	1.19434	1.17236
129	86	2	1.10845	1.12103	1.08433	1.07508	1.07676	1.07691	1.0775	1.06904	1.08417	1.0635	1.06161	1.06677	1.08308	1.28822	1.26091	1.20971	1.14716	1.16926	1.09022	1.13355	1.12078	1.12065	1.17355	1.14997	1.17081	1.14861	1.09257	1.08641	1.07282	1.08854	1.08247	1.07617	1.12844	1.07622	1.07971	1.16887	1.1039	1.1067	1.10622	1.26181	1.21414	1.08486	1.09029	1.097	1.113	1.26879	1.21691
130	89	2	1.09047	1.08144	1.08141	1.1011	1.09727	1.07245	1.0729	1.07191	1.06612	1.06717	1.07439	1.07388	1.10776	1.24389	1.23149	1.17579	1.10227	1.09035	1.09879	1.08972	1.09011	1.10396	1.11383	1.08416	1.08496	1.09708	1.09029	1.09015	1.15782	1.10205	1.15056	1.09149	1.12858	1.09388	1.09178	1.10603	1.10142	1.10978	1.11994	1.09693	1.12605	1.16827	1.14278	1.13659	1.15817	1.15015	1.14913
131	83	2	1.10254	1.09989	1.09486	1.08815	1.07727	1.0761	1.07406	1.06412	1.06375	1.07344	1.07408	1.07499	1.10593	1.35968	1.39134	1.38819	1.32106	1.17044	1.11189	1.15405	1.09901	1.09795	1.10076	1.10773	1.08934	1.14306	1.15479	1.09012	1.09132	1.12558	1.07938	1.07634	1.13391	1.13806	1.11895	1.10113	1.1775	1.14177	1.11448	1.16697	1.12425	1.1507	1.17026	1.14951	1.1677	1.21979	1.21495
132	87	2	1.09138	1.09042	1.07102	1.08132	1.0757	1.06808	1.07184	1.06581	1.07852	1.08607	1.08263	1.08795	1.09243	1.2504	1.27662	1.2769	1.23816	1.22039	1.20349	1.1962	1.1557	1.21192	1.13216	1.175	1.1671	1.17084	1.19014	1.16296	1.15401	1.16485	1.14241	1.15571	1.13726	1.15145	1.16906	1.14621	1.13375	1.14564	1.15313	1.15611	1.15444	1.15276	1.13732	1.12581	1.12163	1.16479	1.16279
133	93	2	1.09195	1.08911	1.08737	1.08049	1.07842	1.08278	1.10465	1.07739	1.08003	1.07691	1.08216	1.08085	1.13369	1.23206	1.2496	1.20594	1.1223	1.12397	1.1352	1.23514	1.13393	1.16468	1.1868	1.15737	1.13863	1.17728	1.21964	1.25201	1.18288	1.16574	1.25642	1.18464	1.18414	1.2276	1.16931	1.23515	1.21128	1.20174	1.14386	1.16728	1.14585	1.13962	1.13798	1.15308	1.14368	1.23847	1.21132
134	94	2	1.19871	1.21368	1.1571	1.1423	1.14272	1.17871	1.14443	1.14052	1.15574	1.14776	1.12496	1.14414	1.19806	1.33571	1.32929	1.3107	1.31847	1.22532	1.14809	1.12828	1.1239	1.14449	1.13713	1.13686	1.09965	1.11308	1.13053	1.26048	1.23922	1.25423	1.27028	1.28838	1.27862	1.30249	1.3782	1.37517	1.35615	1.28047	1.38531	1.38478	1.36121	1.34401	1.30548	1.30006	1.40446	1.23277	1.22863
135	95	2	1.08133	1.07647	1.07983	1.08218	1.07417	1.07038	1.07242	1.07634	1.07713	1.07524	1.07992	1.07888	1.14988	1.30517	1.27851	1.20323	1.18421	1.11323	1.10664	1.1041	1.0956	1.09522	1.08944	1.09838	1.09201	1.09874	1.11522	1.10158	1.10813	1.10892	1.14329	1.13491	1.12043	1.12805	1.1098	1.12544	1.09775	1.10278	1.09859	1.11333	1.15386	1.10227	1.1135	1.17918	1.21487	1.19278	1.16632
136	96	2	1.10658	1.08876	1.0856	1.08606	1.08485	1.09181	1.08595	1.09439	1.09274	1.09545	1.09388	1.10626	1.21089	1.4215	1.41818	1.34512	1.20846	1.1605	1.12804	1.19781	1.11916	1.15412	1.14482	1.16398	1.12701	1.13391	1.12426	1.1456	1.14463	1.12028	1.10355	1.11759	1.1164	1.10937	1.11148	1.11084	1.1174	1.10591	1.10296	1.10479	1.09795	1.12344	1.10386	1.12396	1.18663	1.25007	1.22783
137	97	2	1.10586	1.10215	1.10574	1.10828	1.10577	1.09578	1.09597	1.0823	1.0958	1.08976	1.07856	1.08487	1.12252	1.31144	1.27711	1.26154	1.29302	1.12369	1.10423	1.10142	1.13935	1.09317	1.09305	1.08867	1.09075	1.09323	1.08792	1.08688	1.16032	1.13986	1.08742	1.12601	1.07525	1.08563	1.0848	1.15123	1.08555	1.10318	1.08668	1.11142	1.11921	1.13202	1.13912	1.1423	1.10819	1.20324	1.18886
138	98	2	1.12091	1.10886	1.10332	1.09614	1.08792	1.08231	1.08442	1.0854	1.08351	1.09037	1.08226	1.09192	1.16739	1.30468	1.31071	1.24229	1.18831	1.1238	1.1214	1.10878	1.14235	1.12661	1.16046	1.11442	1.11224	1.10878	1.11246	1.12741	1.15808	1.12228	1.11927	1.12039	1.1208	1.12093	1.11846	1.15723	1.11808	1.16021	1.1151	1.12332	1.1214	1.16158	1.1516	1.13449	1.18692	1.20933	1.20699
139	99	2	1.08633	1.0878	1.09857	1.08109	1.07997	1.0813	1.07392	1.09467	1.08181	1.08592	1.07615	1.09923	1.1972	1.26659	1.29718	1.24304	1.2225	1.19892	1.2494	1.23145	1.13037	1.16159	1.10638	1.14341	1.10837	1.0898	1.09139	1.08767	1.10207	1.13305	1.14066	1.21379	1.12321	1.25128	1.22044	1.11841	1.201	1.14333	1.22181	1.10992	1.12635	1.11907	1.13569	1.11245	1.2193	1.15125	1.13883
140	100	2	1.09606	1.08284	1.09251	1.08929	1.08983	1.09242	1.08392	1.08371	1.16042	1.18633	1.23524	1.18244	1.20678	1.38277	1.43143	1.43141	1.36393	1.16389	1.19436	1.19999	1.17358	1.27267	1.13939	1.12274	1.1284	1.17048	1.12329	1.12601	1.08172	1.10641	1.09535	1.16925	1.11988	1.16557	1.20097	1.10995	1.12929	1.2237	1.11277	1.16554	1.11698	1.11289	1.10924	1.12702	1.12699	1.26894	1.25402
141	101	2	1.0732	1.06778	1.06828	1.07102	1.07294	1.07436	1.07776	1.07448	1.11129	1.06648	1.10417	1.22467	1.19668	1.38211	1.39804	1.36517	1.20959	1.18936	1.08473	1.07642	1.06444	1.06321	1.06313	1.07805	1.0738	1.0757	1.10409	1.07269	1.07559	1.08448	1.08915	1.13203	1.21636	1.13187	1.11927	1.15571	1.07418	1.10797	1.08905	1.08662	1.07719	1.08007	1.13504	1.16165	1.22853	1.16628	1.13447
142	102	2	1.08802	1.08336	1.08023	1.0801	1.06897	1.06938	1.0659	1.06473	1.06269	1.0646	1.06815	1.06766	1.12225	1.268	1.27353	1.25456	1.26055	1.21846	1.08709	1.13012	1.08109	1.07783	1.09197	1.11831	1.16524	1.14254	1.1099	1.08157	1.08106	1.08072	1.0834	1.08382	1.09346	1.10074	1.1015	1.086	1.15386	1.15203	1.23442	1.23909	1.17792	1.26756	1.17948	1.08993	1.08238	1.17682	1.17997
143	103	2	1.0892	1.09513	1.08548	1.08332	1.07931	1.08477	1.08131	1.08874	1.07775	1.07066	1.07006	1.07207	1.15363	1.38676	1.41749	1.29266	1.23874	1.0996	1.11714	1.08994	1.082	1.09134	1.08273	1.0807	1.08952	1.09241	1.09207	1.1019	1.14254	1.09814	1.15193	1.17722	1.16048	1.18936	1.10959	1.08841	1.13031	1.11176	1.10095	1.09585	1.2013	1.09686	1.09957	1.09521	1.15024	1.17647	1.15965
144	95	2	1.09049	1.0935	1.08882	1.08791	1.07748	1.07375	1.06678	1.06821	1.0599	1.06145	1.06305	1.06881	1.10992	1.2565	1.26921	1.24103	1.27709	1.15869	1.13127	1.10042	1.10314	1.09668	1.08638	1.09047	1.09023	1.08804	1.08406	1.08316	1.08857	1.17358	1.09542	1.08208	1.08108	1.07864	1.09443	1.08944	1.11962	1.14962	1.18273	1.10004	1.10387	1.08924	1.08953	1.095	1.17432	1.18697	1.1574
145	104	2	1.11558	1.12814	1.09926	1.11208	1.14875	1.09497	1.08659	1.10349	1.08568	1.08376	1.08736	1.08645	1.22222	1.40895	1.34789	1.3614	1.11318	1.15775	1.10524	1.11856	1.1073	1.11391	1.09392	1.10202	1.09445	1.11318	1.15436	1.11862	1.10555	1.20281	1.11049	1.10194	1.10945	1.11666	1.11277	1.10886	1.18401	1.1383	1.13803	1.11788	1.29884	1.19064	1.07733	1.26002	1.20002	1.26389	1.24552
146	105	2	1.0913	1.09504	1.08401	1.08471	1.07561	1.08357	1.07709	1.0803	1.10442	1.07087	1.07233	1.07179	1.12024	1.29144	1.27931	1.27329	1.26259	1.21571	1.16508	1.08242	1.13941	1.14689	1.08501	1.14187	1.1123	1.20083	1.19814	1.22527	1.1668	1.23307	1.32561	1.31787	1.26811	1.34216	1.37387	1.39294	1.43235	1.3941	1.36416	1.38139	1.37987	1.38665	1.38804	1.41563	1.38854	1.24202	1.25497
147	106	2	1.0931	1.09605	1.09229	1.09651	1.10077	1.09216	1.09336	1.07876	1.09707	1.11578	1.09167	1.09648	1.19609	1.3747	1.38043	1.33902	1.24598	1.26151	1.17335	1.16554	1.12081	1.1537	1.12944	1.1206	1.15783	1.14582	1.16969	1.1721	1.20337	1.32193	1.26466	1.25533	1.25839	1.23897	1.22468	1.18247	1.1687	1.17928	1.16566	1.1488	1.15521	1.16117	1.14822	1.14474	1.15637	1.22774	1.22269
148	100	2	1.10272	1.10677	1.11723	1.10166	1.09515	1.09979	1.10122	1.09597	1.08759	1.08683	1.09161	1.09	1.1398	1.30978	1.32264	1.32897	1.28479	1.29433	1.22382	1.1499	1.23419	1.26847	1.12332	1.12704	1.17554	1.14801	1.16587	1.12826	1.1492	1.12857	1.12799	1.12244	1.14107	1.11679	1.15211	1.18925	1.14888	1.21057	1.11417	1.11765	1.11447	1.11606	1.10393	1.12975	1.1243	1.2889	1.26213
149	107	2	1.10451	1.09757	1.10287	1.091	1.09656	1.08262	1.07649	1.0698	1.06968	1.06796	1.07711	1.07809	1.18341	1.37538	1.35798	1.26035	1.25361	1.10705	1.08829	1.1057	1.08178	1.09256	1.10924	1.10294	1.09166	1.08334	1.09838	1.10759	1.07993	1.10224	1.08858	1.09577	1.08849	1.09523	1.10002	1.13494	1.09078	1.20223	1.17388	1.14674	1.10006	1.13773	1.09444	1.08971	1.14481	1.23676	1.17848
150	101	2	1.06824	1.06566	1.06613	1.06091	1.07028	1.06895	1.07487	1.06036	1.05991	1.05667	1.06177	1.05736	1.08657	1.06414	1.06416	1.05734	1.07639	1.09193	1.09072	1.10756	1.09218	1.09135	1.08739	1.10365	1.09491	1.12298	1.16829	1.12073	1.1209	1.16927	1.26839	1.12793	1.1489	1.14383	1.10314	1.14	1.11812	1.11568	1.19415	1.12628	1.16644	1.11912	1.13081	1.17072	1.12386	1.18277	1.15703
151	108	2	1.1068	1.09891	1.11002	1.10388	1.10118	1.10378	1.09395	1.09474	1.08669	1.09005	1.08933	1.09975	1.20447	1.31984	1.33355	1.28631	1.31611	1.26724	1.14582	1.27229	1.237	1.19578	1.11216	1.12088	1.19693	1.11531	1.14396	1.12565	1.12122	1.1335	1.15939	1.14414	1.11872	1.19791	1.13108	1.12103	1.12753	1.11836	1.12132	1.1369	1.12845	1.12539	1.11996	1.16127	1.17531	1.2178	1.21007
152	109	2	1.08292	1.08404	1.07828	1.07326	1.07482	1.07723	1.07698	1.07986	1.07379	1.0767	1.08	1.07934	1.19632	1.25177	1.28407	1.26212	1.24544	1.20633	1.21039	1.22846	1.1322	1.11495	1.0971	1.12999	1.10481	1.1509	1.22232	1.14333	1.1331	1.12066	1.12993	1.12293	1.11579	1.1205	1.16084	1.1687	1.22316	1.22546	1.18178	1.14721	1.1739	1.16232	1.15245	1.16083	1.17331	1.18432	1.16684
153	110	2	1.08992	1.10745	1.10475	1.09185	1.09236	1.09001	1.09254	1.08795	1.1456	1.11332	1.08632	1.08726	1.18734	1.31255	1.23144	1.33054	1.29479	1.21399	1.1876	1.19082	1.13946	1.14205	1.20581	1.14686	1.12208	1.11135	1.18738	1.12435	1.12621	1.17438	1.12431	1.12757	1.11501	1.1235	1.11299	1.12706	1.11029	1.1132	1.12049	1.1679	1.24071	1.20088	1.16068	1.1499	1.23145	1.15506	1.18404
154	111	2	1.09281	1.11639	1.1169	1.11416	1.10311	1.09876	1.09973	1.10075	1.10797	1.11028	1.09847	1.11287	1.17881	1.27744	1.28876	1.23687	1.11385	1.10781	1.10903	1.10527	1.10852	1.09736	1.10447	1.10744	1.12629	1.11623	1.1169	1.11636	1.13237	1.11515	1.11362	1.1561	1.15751	1.20592	1.16423	1.17521	1.17966	1.16579	1.19198	1.11269	1.10771	1.11895	1.10949	1.10999	1.19323	1.23578	1.22805
155	110	2	1.07321	1.07465	1.10415	1.07718	1.07622	1.07734	1.08565	1.08753	1.08496	1.08713	1.08701	1.08878	1.23982	1.3251	1.33116	1.29427	1.20187	1.15007	1.13265	1.17553	1.14756	1.19587	1.23009	1.21638	1.10189	1.09063	1.10114	1.13047	1.21053	1.14614	1.13232	1.12474	1.11749	1.22141	1.1362	1.10076	1.08865	1.10968	1.14378	1.13672	1.10077	1.1538	1.10172	1.0792	1.08838	1.19004	1.17742
156	109	2	1.08596	1.07954	1.08036	1.08025	1.0787	1.07306	1.07115	1.07286	1.0708	1.0719	1.06944	1.06836	1.15316	1.25457	1.21973	1.21981	1.16318	1.0977	1.11539	1.09819	1.12424	1.1029	1.10393	1.104	1.14413	1.14021	1.10658	1.11588	1.11354	1.11435	1.1199	1.17387	1.13367	1.21329	1.18536	1.19809	1.28957	1.28758	1.29962	1.26332	1.28643	1.23857	1.27883	1.23833	1.31695	1.18588	1.19433
157	112	2	1.10807	1.1086	1.11135	1.11982	1.11128	1.10782	1.11798	1.11308	1.11422	1.11409	1.12184	1.12292	1.09077	1.11884	1.12712	1.09428	1.07906	1.076	1.08134	1.07386	1.07019	1.07051	1.06183	1.0621	1.1146	1.11656	1.11665	1.12237	1.13835	1.13397	1.14295	1.14261	1.18124	1.22304	1.261	1.27523	1.22603	1.15611	1.2191	1.29087	1.36638	1.30216	1.33835	1.22222	1.24078	1.26841	1.23138
158	113	2	1.07817	1.09671	1.10866	1.09028	1.07647	1.07768	1.07329	1.07607	1.06453	1.0652	1.0736	1.06537	1.13839	1.22682	1.20728	1.16252	1.13581	1.06637	1.06111	1.05708	1.06392	1.06459	1.06527	1.08103	1.07861	1.08897	1.11664	1.10597	1.12267	1.0942	1.11508	1.08008	1.0944	1.07086	1.0716	1.06774	1.06498	1.07114	1.07419	1.11022	1.08104	1.08896	1.07064	1.06334	1.07234	1.13502	1.12585
159	114	2	1.10169	1.10091	1.09633	1.09826	1.09204	1.09043	1.08928	1.09254	1.09366	1.08687	1.09955	1.08986	1.24099	1.385	1.3616	1.36458	1.33072	1.30649	1.15143	1.10652	1.09379	1.0969	1.09345	1.10855	1.16612	1.10038	1.11077	1.10449	1.12901	1.09453	1.09407	1.12886	1.10857	1.17309	1.12191	1.11306	1.12355	1.11685	1.1153	1.11132	1.12847	1.09331	1.21347	1.13891	1.16342	1.24537	1.21887
160	115	2	1.10265	1.08567	1.11365	1.08104	1.08569	1.08783	1.0894	1.14837	1.10933	1.10096	1.09888	1.10106	1.33732	1.44436	1.4291	1.46757	1.21657	1.19322	1.24603	1.20807	1.14347	1.16144	1.19997	1.09003	1.1652	1.09007	1.10324	1.16714	1.11778	1.16647	1.10097	1.09479	1.08738	1.10597	1.08188	1.13984	1.10523	1.09405	1.13948	1.15737	1.08534	1.16915	1.11642	1.09175	1.14515	1.16211	1.14468
161	116	2	1.09889	1.09504	1.09223	1.09248	1.08367	1.08235	1.08436	1.09409	1.08633	1.10221	1.08866	1.09022	1.268	1.267	1.29229	1.2982	1.19623	1.15093	1.21515	1.13411	1.1067	1.08938	1.13925	1.16413	1.13573	1.18081	1.12496	1.10313	1.22452	1.32229	1.26853	1.33161	1.30476	1.35194	1.38165	1.29125	1.2234	1.22209	1.24064	1.17686	1.23504	1.16636	1.18605	1.18076	1.21189	1.23566	1.21316
162	117	2	1.07547	1.08259	1.09962	1.09464	1.07438	1.08556	1.07044	1.07776	1.05886	1.07765	1.08229	1.07613	1.20212	1.29362	1.26937	1.22969	1.22303	1.18828	1.24194	1.16475	1.1148	1.2044	1.18557	1.15078	1.15312	1.20073	1.14228	1.15956	1.22021	1.29686	1.29177	1.1991	1.24671	1.20366	1.24974	1.24398	1.15753	1.22482	1.24006	1.24382	1.17606	1.17192	1.17347	1.17444	1.14147	1.23202	1.20106
163	118	2	1.1231	1.11491	1.10201	1.10523	1.09012	1.08211	1.08284	1.07833	1.07855	1.11586	1.19489	1.11707	1.29685	1.34811	1.40632	1.33879	1.18885	1.0789	1.0802	1.13505	1.1023	1.08684	1.0882	1.16376	1.07549	1.08837	1.12566	1.13335	1.13771	1.09284	1.07767	1.07115	1.08797	1.07679	1.06817	1.10717	1.0737	1.07731	1.10639	1.06938	1.07563	1.08974	1.10467	1.08177	1.0763	1.12663	1.11877
164	116	2	1.09536	1.10167	1.10873	1.09562	1.09253	1.09337	1.09855	1.06932	1.08524	1.06794	1.08303	1.09139	1.20795	1.1649	1.15464	1.16196	1.12075	1.13632	1.16733	1.13417	1.10115	1.15137	1.15315	1.20736	1.1658	1.1564	1.19456	1.19757	1.14901	1.15951	1.13617	1.13933	1.17622	1.11614	1.11852	1.11536	1.08919	1.1826	1.19922	1.13378	1.09959	1.16395	1.16979	1.14996	1.117	1.23891	1.24272
165	119	2	1.11587	1.11477	1.11169	1.11854	1.11379	1.10793	1.10354	1.14908	1.09919	1.09518	1.09549	1.10857	1.22792	1.31035	1.29295	1.2934	1.25726	1.1941	1.17058	1.17668	1.12446	1.20052	1.20883	1.24387	1.1609	1.22696	1.18375	1.21397	1.20874	1.24935	1.16211	1.28142	1.23928	1.23836	1.18691	1.17434	1.15538	1.24863	1.23714	1.17794	1.17504	1.18794	1.18785	1.15264	1.16778	1.21296	1.21906
166	115	2	1.09693	1.09782	1.1004	1.07239	1.09089	1.17577	1.11943	1.15495	1.12839	1.10533	1.08363	1.08842	1.26752	1.33402	1.35861	1.32839	1.28343	1.22832	1.23892	1.09311	1.23915	1.17725	1.10318	1.09628	1.08922	1.09745	1.16975	1.11116	1.1243	1.10246	1.1242	1.24799	1.10792	1.13938	1.11009	1.11275	1.11722	1.13589	1.11279	1.20683	1.13352	1.10535	1.12083	1.09215	1.22836	1.2614	1.24673
167	118	2	1.07114	1.07748	1.06706	1.06151	1.06418	1.07575	1.08964	1.09364	1.09391	1.0916	1.13636	1.11369	1.13862	1.1709	1.17044	1.24715	1.09621	1.09861	1.09839	1.12808	1.13589	1.11336	1.09931	1.09182	1.08709	1.09461	1.12449	1.14061	1.15646	1.11906	1.0996	1.09548	1.11281	1.11772	1.08737	1.11142	1.09916	1.08869	1.08302	1.08974	1.08048	1.08665	1.10135	1.10073	1.12144	1.09045	1.12581
168	120	3	1.09897	1.11258	1.13771	1.10456	1.09762	1.1136	1.13031	1.10797	1.13235	1.10832	1.10284	1.10563	1.09717	1.2296	1.28019	1.29699	1.29282	1.25564	1.24922	1.24273	1.2964	1.284	1.26915	1.2612	1.22869	1.20124	1.21506	1.24007	1.25079	1.05693	1.17866	1.20573	1.1649	1.22905	1.21629	1.20244	1.20994	1.20715	1.13941	1.18504	1.16134	1.17547	1.18289			1.27332	1.19401
169	121	3	1.08656	1.0814	1.07903	1.07554	1.07158	1.08688	1.07605	1.08885	1.08845	1.08492	1.08387	1.07637	1.11888	1.20915	1.32261	1.26454	1.21446	1.13908	1.09405	1.08666	1.07901	1.07396	1.07158	1.07955	1.07372	1.07685	1.07916	1.08133	1.11007	1.07997	1.10055	1.0877	1.14207	1.10636	1.10243	1.09232	1.15772	1.22614	1.25195	1.16281	1.10653	1.19239	1.11536			1.19538	1.17465
170	122	3	1.07378	1.07353	1.07264	1.08118	1.08998	1.09584	1.10241	1.1104	1.10033	1.10455	1.10365	1.09093	1.08991	1.18048	1.21337	1.2488	1.22893	1.19353	1.18109	1.18059	1.181	1.16786	1.15412	1.1209	1.08678	1.11694	1.0849	1.10952	1.0878	1.05746	1.0971	1.09442	1.0945	1.10343	1.09724	1.1301	1.14867	1.09743	1.09448	1.10315	1.09013	1.09949	1.11303			1.10892	1.10826
171	123	3	1.10609	1.09709	1.09991	1.09251	1.09415	1.10816	1.08599	1.07895	1.08207	1.0819	1.081	1.06589	1.06581	1.26958	1.30857	1.26106	1.27141	1.24136	1.07906	1.07793	1.06922	1.06714	1.0633	1.18649	1.07023	1.07114	1.07185	1.08692	1.0742	1.08128	1.08518	1.07907	1.07662	1.08212	1.1472	1.0795	1.1488	1.11845	1.20295	1.12558	1.07927	1.10629	1.06829			1.19859	1.19226
172	122	3	1.09294	1.08748	1.08987	1.13927	1.09948	1.11617	1.12845	1.11914	1.10468	1.11065	1.129	1.0901	1.09143	1.26069	1.2655	1.32005	1.26834	1.22158	1.25101	1.17249	1.13381	1.10088	1.0839	1.10025	1.09948	1.09363	1.08975	1.13613	1.10212	1.06058	1.10732	1.09968	1.13045	1.1059	1.11683	1.1006	1.17232	1.14923	1.12579	1.12398	1.11446	1.10416	1.10205			1.16034	1.1516
173	124	3	1.08686	1.08015	1.08752	1.08256	1.0806	1.08237	1.08752	1.07356	1.11774	1.15933	1.0962	1.13344	1.08713	1.24602	1.32391	1.34183	1.26877	1.13208	1.08737	1.11	1.09073	1.07185	1.07176	1.08205	1.07634	1.08717	1.08711	1.10073	1.08349	1.06366	1.09108	1.19737	1.19669	1.20518	1.18383	1.10162	1.20468	1.08745	1.10612	1.0861	1.1436	1.09173	1.08437			1.178	1.14039
174	125	3	1.08632	1.08124	1.0815	1.08988	1.09339	1.10221	1.11317	1.09285	1.09032	1.09512	1.09748	1.1381	1.11089	1.23402	1.2814	1.3359	1.28259	1.27334	1.12696	1.14756	1.12594	1.19493	1.16538	1.1547	1.15085	1.13188	1.11448	1.13906	1.1235	1.05571	1.13051	1.12924	1.12078	1.14348	1.12032	1.1293	1.13088	1.16372	1.13511	1.2085	1.13328	1.14178	1.13068			1.15213	1.11144
175	125	3	1.07478	1.07381	1.06863	1.07707	1.0817	1.08303	1.10714	1.10382	1.07335	1.07693	1.07516	1.06855	1.08224	1.26418	1.28703	1.22819	1.26716	1.22084	1.07729	1.09173	1.08041	1.10634	1.09732	1.1792	1.16901	1.12422	1.09338	1.06765	1.06909	1.06424	1.08637	1.06703	1.09453	1.08604	1.08905	1.08398	1.17126	1.123	1.1416	1.17723	1.08775	1.09221	1.10014			1.12956	1.12606
176	126	3	1.10402	1.08005	1.08898	1.11385	1.08273	1.14665	1.09843	1.17224	1.14631	1.08986	1.11598	1.13661	1.11438	1.22168	1.22718	1.22654	1.26007	1.13928	1.11887	1.09851	1.08996	1.10648	1.0979	1.1053	1.08667	1.12093	1.12873	1.16642	1.14731	1.1259	1.13549	1.14529	1.13652	1.1293	1.11883	1.1178	1.12841	1.12524	1.11461	1.1242	1.12178	1.13458	1.12649			1.3119	1.18617
177	127	3	1.13261	1.15296	1.10246	1.12684	1.14481	1.11114	1.21088	1.12818	1.14286	1.25258	1.20647	1.09207	1.21897	1.36587	1.36653	1.44731	1.20884	1.33519	1.177	1.23744	1.19983	1.22256	1.17662	1.24937	1.11813	1.12521	1.20691	1.23383	1.20204	1.15507	1.13606	1.15016	1.23662	1.23673	1.27037	1.11372	1.23035	1.19928	1.18268	1.15518	1.16271	1.13484	1.11105			1.27117	1.30289
178	126	3	1.17289	1.11012	1.12606	1.18772	1.10294	1.22641	1.13367	1.10532	1.12463	1.11908	1.13395	1.16121	1.12216	1.23567	1.28809	1.27758	1.24754	1.23153	1.11169	1.14357	1.11265	1.10367	1.11872	1.1164	1.09575	1.10785	1.13528	1.16862	1.24846	1.22531	1.16374	1.15989	1.10365	1.15178	1.10996	1.09579	1.10727	1.10712	1.1002	1.11118	1.11382	1.10262	1.10448			1.47217	1.35942
179	128	3	1.06879	1.05944	1.07119	1.0669	1.06082	1.06217	1.06302	1.05854	1.06269	1.058	1.06067	1.07156	1.06871	1.22386	1.26229	1.26946	1.20899	1.1035	1.06697	1.07081	1.06435	1.07678	1.0707	1.12095	1.07856	1.07097	1.06965	1.066	1.07029	1.06787	1.08393	1.09454	1.08729	1.07644	1.07933	1.13055	1.16964	1.17521	1.09015	1.08564	1.08159	1.07483	1.07335			1.10636	1.11609
180	129	3	1.10663	1.1109	1.09405	1.1241	1.0951	1.14735	1.12472	1.10226	1.12256	1.08524	1.09192	1.08377	1.09787	1.40099	1.50806	1.48982	1.34634	1.17032	1.11224	1.09286	1.08974	1.11326	1.09753	1.0857	1.11738	1.10554	1.10299	1.09237	1.10547	1.09246	1.10087	1.10736	1.09523	1.08953	1.12035	1.09706	1.09907	1.09504	1.10234	1.10205	1.11213	1.10075	1.09304			1.1343	1.12812
181	130	3	1.10009	1.10701	1.0999	1.11886	1.16862	1.14491	1.11986	1.17332	1.18814	1.12755	1.11588	1.10201	1.13195	1.29019	1.31054	1.29885	1.30944	1.28551	1.23997	1.25129	1.21988	1.1345	1.15075	1.10431	1.1064	1.10409	1.11317	1.07992	1.09155	1.11292	1.10715	1.09351	1.09881	1.20198	1.12144	1.08518	1.11087	1.09235	1.09922	1.19701	1.09954	1.09249	1.12548			1.18249	1.17803
182	129	3	1.16073	1.11963	1.1018	1.2127	1.10757	1.21362	1.11849	1.14535	1.1231	1.10996	1.10154	1.10361	1.10992	1.46826	1.49743	1.5104	1.43298	1.31738	1.12871	1.12926	1.10842	1.11848	1.1354	1.1233	1.12981	1.12691	1.095	1.11222	1.14684	1.11602	1.12126	1.14971	1.11159	1.14323	1.15913	1.10535	1.18579	1.12681	1.12078	1.12174	1.13295	1.11816	1.12671			1.15447	1.15577
183	131	3	1.0934	1.09006	1.08734	1.07741	1.07207	1.09081	1.09852	1.07387	1.07455	1.07502	1.12623	1.0734	1.08372	1.2243	1.24809	1.23587	1.15392	1.08977	1.0933	1.16708	1.09704	1.08677	1.08657	1.08675	1.0866	1.0944	1.08919	1.11166	1.09988	1.09399	1.09121	1.09031	1.08729	1.09842	1.17329	1.18736	1.13432	1.10197	1.14976	1.10154	1.12274	1.1227	1.1043			1.2051	1.17757
184	130	3	1.07584	1.06777	1.05943	1.07264	1.07485	1.09224	1.08931	1.09937	1.11665	1.09918	1.07643	1.07538	1.08836	1.18725	1.2075	1.20035	1.18417	1.225	1.20277	1.20698	1.12794	1.13055	1.09667	1.08716	1.11178	1.1347	1.10314	1.10086	1.09545	1.1087	1.123	1.13939	1.12376	1.18202	1.12429	1.12541	1.19867	1.21385	1.21961	1.25551	1.2306	1.15538	1.18886			1.21231	1.10388
185	132	3	1.11151	1.11727	1.08439	1.1072	1.1254	1.14237	1.19335	1.14207	1.19018	1.19343	1.09387	1.08935	1.13561	1.37166	1.43646	1.3611	1.37891	1.28279	1.38729	1.33564	1.2528	1.17511	1.15727	1.25858	1.18766	1.16834	1.09092	1.10636	1.11816	1.08606	1.09331	1.09385	1.10125	1.09157	1.11371	1.09286	1.14239	1.13861	1.14927	1.12621	1.20546	1.11767	1.13721			1.13947	1.14942
186	131	3	1.11747	1.07598	1.07555	1.06941	1.06911	1.06595	1.06515	1.06395	1.06808	1.06335	1.07228	1.11019	1.19684	1.28598	1.33087	1.28357	1.29586	1.29223	1.26217	1.23608	1.12652	1.20391	1.15447	1.14418	1.2592	1.31439	1.32437	1.34895	1.29327	1.36423	1.33218	1.40362	1.34428	1.35049	1.40546	1.37279	1.30478	1.31471	1.30035	1.26416	1.25506	1.24363	1.24869			1.24471	1.17108
187	132	3	1.10394	1.09953	1.08125	1.10981	1.11142	1.12623	1.11133	1.11383	1.13406	1.13729	1.11642	1.10454	1.1092	1.29904	1.2466	1.29842	1.26944	1.18841	1.14156	1.13635	1.14097	1.1739	1.15156	1.14152	1.11697	1.15684	1.10847	1.11929	1.14178	1.13186	1.21426	1.15489	1.2218	1.23289	1.16799	1.24896	1.18285	1.18008	1.2283	1.18766	1.21381	1.18968	1.1992			1.18333	1.20654
188	133	3	1.05361	1.05277	1.04419	1.05203	1.05471	1.05368	1.06115	1.05635	1.0578	1.05928	1.05583	1.06261	1.07546	1.17972	1.14756	1.11988	1.09938	1.13307	1.08856	1.06977	1.06019	1.07007	1.07744	1.07163	1.08691	1.07244	1.07385	1.07039	1.14652	1.08097	1.07467	1.07678	1.07436	1.08375	1.10777	1.06106	1.08996	1.0952	1.13275	1.10554	1.12165	1.12987	1.09874			1.15864	1.13109
189	133	3	1.1309	1.07834	1.06279	1.08391	1.09011	1.09613	1.13155	1.09338	1.07939	1.08152	1.13484	1.06831	1.08917	1.20657	1.20871	1.24965	1.19776	1.16029	1.15995	1.1303	1.16592	1.17633	1.19125	1.14743	1.09882	1.09956	1.13541	1.13211	1.19492	1.18094	1.16029	1.20808	1.16537	1.18532	1.10866	1.08443	1.13097	1.09769	1.11675	1.10158	1.09374	1.10089	1.10321			1.3907	1.21541
190	134	3	1.07643	1.06936	1.07086	1.0762	1.08971	1.09473	1.16002	1.10776	1.11073	1.1288	1.09349	1.12986	1.23303	1.34462	1.37497	1.35268	1.29452	1.288	1.30974	1.2664	1.23627	1.21772	1.18058	1.12617	1.12662	1.14236	1.18185	1.14156	1.1459	1.11556	1.21283	1.18589	1.19411	1.17654	1.12776	1.10359	1.12322	1.08728	1.13994	1.12872	1.12646	1.10038	1.10984			1.14337	1.11746
191	135	3	1.11103	1.09309	1.07982	1.10718	1.09737	1.10275	1.07884	1.08223	1.09438	1.10017	1.09526	1.11261	1.15945	1.38306	1.42264	1.36657	1.36011	1.31345	1.27088	1.19882	1.25147	1.21094	1.14691	1.11197	1.11296	1.18038	1.10127	1.07963	1.13989	1.1606	1.10939	1.12056	1.09931	1.12243	1.08137	1.09124	1.12728	1.15245	1.22544	1.17467	1.19857	1.25802	1.20469			1.2126	1.12822
192	136	3	1.11037	1.0804	1.07883	1.085	1.07131	1.08243	1.09281	1.0708	1.19706	1.09525	1.06919	1.18399	1.23489	1.34831	1.31773	1.33939	1.28858	1.28934	1.16784	1.15536	1.09531	1.07682	1.07967	1.0761	1.08044	1.10327	1.13252	1.13606	1.16206	1.13977	1.13744	1.21913	1.20098	1.22992	1.17291	1.10354	1.1477	1.13624	1.18359	1.19802	1.2213	1.15449	1.20205			1.23973	1.15312
193	137	3	1.08891	1.09982	1.07165	1.0935	1.10744	1.11492	1.23483	1.17428	1.15697	1.18032	1.1776	1.08898	1.11062	1.27798	1.31824	1.25097	1.17228	1.22716	1.21228	1.11301	1.12223	1.09268	1.19584	1.13337	1.1087	1.19461	1.17392	1.15554	1.15405	1.25882	1.28905	1.29399	1.22359	1.27172	1.13062	1.12358	1.25712	1.144	1.20713	1.1694	1.2016	1.18372	1.16355			1.13586	1.18112
194	138	3	1.07845	1.0679	1.06244	1.12138	1.10024	1.1579	1.08573	1.07671	1.086	1.12146	1.07672	1.075	1.16562	1.27189	1.3334	1.25601	1.21138	1.19785	1.14756	1.14435	1.15944	1.12975	1.1049	1.18097	1.1604	1.18734	1.1902	1.11276	1.17269	1.20907	1.2088	1.24404	1.15616	1.18781	1.0704	1.0775	1.15568	1.14982	1.18265	1.11832	1.15562	1.09294	1.10396			1.14964	1.13874
195	134	3	1.11385	1.11118	1.08089	1.10553	1.09346	1.1778	1.0956	1.1269	1.10274	1.08518	1.0799	1.12066	1.17261	1.32423	1.38736	1.33802	1.22266	1.21454	1.11253	1.11458	1.08353	1.14221	1.11116	1.11807	1.08367	1.09543	1.13947	1.14015	1.16913	1.1574	1.13882	1.14558	1.12855	1.09082	1.11794	1.07731	1.09726	1.14712	1.10603	1.09352	1.10722	1.09797	1.10873			1.26059	1.19696
196	139	3	1.10821	1.1009	1.06091	1.17814	1.15108	1.12977	1.17559	1.14489	1.13952	1.11532	1.05863	1.06174	1.08441	1.23355	1.27073	1.23028	1.22458	1.20822	1.20665	1.1047	1.07794	1.06513	1.06517	1.07196	1.06346	1.07304	1.06315	1.07056	1.07461	1.07145	1.11724	1.08832	1.1179	1.07713	1.05901	1.05947	1.07463	1.06458	1.07017	1.09037	1.06984	1.1088	1.07616			1.17339	1.15129
197	140	3	1.12415	1.133	1.12948	1.11955	1.12365	1.11449	1.10931	1.10851	1.10559	1.11075	1.0954	1.09584	1.16627	1.25559	1.25828	1.26269	1.22808	1.20659	1.13758	1.24911	1.19368	1.18519	1.10522	1.09756	1.12219	1.18705	1.10452	1.11306	1.10289	1.11308	1.11859	1.11738	1.18539	1.10641	1.14159	1.13141	1.13753	1.22502	1.17349	1.19166	1.19393	1.28385	1.28367			1.20895	1.19748
198	141	3	1.10618	1.1035	1.13706	1.09558	1.08311	1.09288	1.09119	1.09746	1.07348	1.07755	1.08145	1.07886	1.10285	1.1263	1.16572	1.16748	1.17116	1.13866	1.15303	1.09986	1.10169	1.14435	1.10493	1.15412	1.12199	1.10809	1.12445	1.12266	1.11357	1.13306	1.12645	1.13156	1.12727	1.14996	1.15	1.14885	1.15622	1.15647	1.12861	1.12499	1.13891	1.16213	1.16805			1.22582	1.22711
199	141	3	1.11843	1.10319	1.14455	1.09737	1.14917	1.10074	1.09599	1.0926	1.10769	1.10198	1.10847	1.09314	1.18652	1.26054	1.37211	1.34387	1.34179	1.26585	1.25137	1.23625	1.15265	1.23273	1.17866	1.18381	1.1351	1.15446	1.12474	1.14361	1.13617	1.20428	1.23716	1.14891	1.19636	1.21307	1.17901	1.23533	1.2333	1.267	1.26343	1.23209	1.22602	1.20652	1.19744			1.23423	1.20059
200	142	3	1.08461	1.07933	1.0789	1.08374	1.07989	1.0834	1.11238	1.08139	1.09102	1.07196	1.08834	1.09069	1.17592	1.26316	1.29438	1.30491	1.33739	1.30025	1.26531	1.27045	1.13387	1.10971	1.12099	1.10875	1.10151	1.10448	1.09213	1.11845	1.11687	1.1198	1.11482	1.11312	1.09116	1.1247	1.13812	1.13766	1.12139	1.10267	1.09358	1.08731	1.09138	1.08759	1.10484			1.19572	1.17273
201	143	3	1.094	1.08422	1.08896	1.0909	1.08724	1.08739	1.08466	1.08984	1.08012	1.07855	1.08018	1.07935	1.10398	1.16712	1.19229	1.14789	1.17831	1.19399	1.11707	1.13316	1.09949	1.09181	1.09371	1.09826	1.12755	1.0959	1.10462	1.1035	1.10893	1.07585	1.09186	1.09607	1.12583	1.14081	1.10423	1.10508	1.07429	1.09872	1.07905	1.07959	1.10343	1.09971	1.09167			1.31651	1.28853
202	144	3	1.08755	1.09012	1.0721	1.07216	1.07401	1.07212	1.06084	1.06162	1.06693	1.0953	1.08333	1.08511	1.29971	1.32908	1.3819	1.37147	1.31145	1.17962	1.12265	1.0765	1.08675	1.08627	1.08265	1.08241	1.07355	1.07714	1.07068	1.07012	1.07613	1.07299	1.07074	1.07254	1.08706	1.06203	1.06253	1.06848	1.08345	1.08821	1.08397	1.06993	1.06659	1.06897	1.07979			1.14491	1.13209
203	145	3	1.07609	1.07776	1.0698	1.07807	1.07143	1.07905	1.06186	1.06726	1.11891	1.11474	1.14328	1.10968	1.20145	1.25772	1.25168	1.19701	1.19515	1.18295	1.1496	1.12945	1.10489	1.0784	1.08017	1.10614	1.06494	1.08616	1.10114	1.14242	1.11928	1.08718	1.11614	1.09929	1.14638	1.12256	1.09718	1.19112	1.22803	1.19806	1.24484	1.2367	1.1909	1.22551	1.19406			1.18756	1.17373
204	146	3	1.12991	1.12176	1.11544	1.14769	1.1114	1.10505	1.10628	1.18137	1.16991	1.1808	1.12232	1.13296	1.16294	1.21661	1.25514	1.18457	1.17554	1.18005	1.15141	1.14021	1.13442	1.11903	1.13867	1.11935	1.11708	1.1023	1.15055	1.13175	1.19025	1.09357	1.10428	1.13411	1.13855	1.11465	1.10795	1.14413	1.15892	1.14635	1.1475	1.17198	1.15559	1.16228	1.11239			1.28185	1.26141
205	147	3	1.07234	1.07413	1.07415	1.07872	1.13767	1.06389	1.06652	1.08105	1.06062	1.06398	1.06664	1.07247	1.09152	1.08564	1.09289	1.07368	1.08882	1.07159	1.0698	1.06773	1.07815	1.07899	1.09098	1.09696	1.10263	1.1021	1.09464	1.10615	1.10349	1.06752	1.09287	1.09976	1.10555	1.10354	1.07727	1.09071	1.1004	1.08606	1.08952	1.10558	1.09634	1.08546	1.07192			1.16886	1.1681
206	148	3	1.13862	1.12721	1.13366	1.11804	1.13514	1.11835	1.11832	1.17699	1.14877	1.10806	1.11437	1.09653	1.24054	1.27806	1.31392	1.28196	1.29502	1.18688	1.28405	1.21167	1.2205	1.20507	1.22552	1.20184	1.1523	1.15053	1.17768	1.15255	1.18314	1.1568	1.18714	1.16754	1.27668	1.20895	1.16651	1.2255	1.22102	1.21788	1.2056	1.20485	1.19458	1.19949	1.19418			1.26889	1.26761
207	147	3	1.08003	1.07806	1.07486	1.07249	1.08349	1.09068	1.07229	1.07582	1.06699	1.07282	1.06978	1.10844	1.16931	1.22341	1.23206	1.24755	1.24138	1.24846	1.14237	1.09752	1.07075	1.08295	1.06533	1.06607	1.06047	1.07343	1.12737	1.07254	1.07147	1.0853	1.13657	1.074	1.08307	1.10834	1.1108	1.18557	1.16249	1.25851	1.22048	1.18111	1.15244	1.24466	1.08236			1.13882	1.14382
208	149	3	1.13237	1.13151	1.13084	1.10842	1.10995	1.19545	1.15969	1.13039	1.15425	1.11892	1.12294	1.1135	1.20145	1.21578	1.23459	1.14602	1.22085	1.19931	1.2408	1.21715	1.24856	1.20151	1.26163	1.1902	1.13779	1.242	1.28111	1.22577	1.19835	1.0992	1.13481	1.21639	1.16741	1.20453	1.10615	1.16763	1.16407	1.16245	1.15714	1.15031	1.17299	1.14639	1.11286			1.22002	1.17739
209	150	3	1.09969	1.08671	1.06942	1.06234	1.06693	1.06361	1.06617	1.06488	1.06609	1.06505	1.06612	1.07177	1.18354	1.21028	1.19908	1.14738	1.14155	1.20894	1.2167	1.20749	1.24478	1.25928	1.27887	1.26528	1.28387	1.32913	1.31567	1.31581	1.30648	1.24719	1.20193	1.19639	1.19568	1.1857	1.1924	1.19473	1.18435	1.18661	1.19228	1.1574	1.18112	1.18117	1.20031			1.15512	1.17291
210	151	3	1.07982	1.07979	1.0755	1.07701	1.07814	1.08031	1.076	1.07999	1.07698	1.08083	1.07868	1.08491	1.2544	1.26555	1.28571	1.19397	1.24296	1.25477	1.11699	1.14567	1.08977	1.10453	1.09537	1.10143	1.08574	1.11941	1.08316	1.08304	1.08555	1.08844	1.10279	1.09944	1.07968	1.08028	1.07108	1.09551	1.09837	1.09233	1.09284	1.09721	1.19302	1.0852	1.10294			1.23428	1.22379
211	145	3	1.07158	1.074	1.06877	1.06804	1.06682	1.07794	1.06191	1.07541	1.07075	1.11206	1.0683	1.07108	1.14162	1.19776	1.19302	1.20343	1.19426	1.19201	1.09701	1.08846	1.07949	1.07244	1.07808	1.1111	1.07751	1.08312	1.08256	1.08641	1.1164	1.07316	1.13933	1.0865	1.13282	1.11763	1.10943	1.16551	1.15857	1.10975	1.17833	1.19793	1.22539	1.24571	1.12819			1.19421	1.16001
212	150	3	1.08212	1.07574	1.0807	1.07755	1.07764	1.07328	1.08886	1.08637	1.07077	1.07874	1.08332	1.0634	1.11298	1.14643	1.19708	1.16268	1.19331	1.13534	1.0865	1.08504	1.08188	1.14535	1.10065	1.10718	1.1229	1.1345	1.10805	1.10134	1.13222	1.10683	1.17422	1.20037	1.13518	1.11665	1.08313	1.13885	1.13274	1.1008	1.11932	1.11667	1.1486	1.15856	1.11822			1.20405	1.17768
213	152	3	1.17502	1.12882	1.14054	1.16763	1.1209	1.17955	1.16778	1.13454	1.20679	1.17537	1.17213	1.15182	1.32848	1.32948	1.36487	1.34824	1.35911	1.33211	1.33001	1.324	1.29626	1.21175	1.24038	1.22574	1.14489	1.16499	1.14441	1.13875	1.133	1.10138	1.12403	1.14239	1.18297	1.13919	1.10342	1.16461	1.14395	1.13282	1.18558	1.13836	1.22527	1.18996	1.11694			1.24914	1.3027
214	153	3	1.09464	1.08207	1.09429	1.07504	1.10791	1.09439	1.15019	1.16742	1.1231	1.0775	1.0777	1.064	1.21787	1.26284	1.31607	1.2702	1.24182	1.29502	1.17567	1.12512	1.09022	1.19889	1.10268	1.08134	1.12237	1.08159	1.10813	1.11055	1.09818	1.07294	1.10046	1.10836	1.14168	1.16179	1.07858	1.175	1.2103	1.1064	1.10368	1.15638	1.16766	1.15076	1.11964			1.24321	1.16949
215	154	3	1.07608	1.06492	1.06604	1.06635	1.0696	1.06753	1.06144	1.06527	1.06802	1.06992	1.07053	1.0688	1.10916	1.18405	1.19049	1.14568	1.16127	1.11323	1.10601	1.09143	1.08639	1.08966	1.1062	1.10184	1.14431	1.11163	1.09735	1.13541	1.14741	1.12981	1.13317	1.16231	1.15933	1.17072	1.1688	1.16594	1.14398	1.15758	1.14381	1.12935	1.09533	1.10737	1.09718			1.16502	1.14071
216	155	3	1.08311	1.08131	1.08013	1.0796	1.07353	1.08121	1.07336	1.07581	1.07354	1.07262	1.08153	1.08702	1.08018	1.29462	1.26449	1.2471	1.2525	1.20118	1.20759	1.15769	1.08937	1.09325	1.09459	1.07854	1.07678	1.07741	1.09224	1.12489	1.18227	1.12111	1.11182	1.11264	1.17012	1.10814	1.10603	1.10306	1.14049	1.11228	1.08314	1.08627	1.10015	1.0921	1.09964			1.15756	1.14937
217	156	3	1.09599	1.11766	1.08527	1.09674	1.12749	1.17379	1.23529	1.13044	1.20698	1.13455	1.16226	1.11017	1.1582	1.30661	1.31783	1.28892	1.33468	1.2627	1.25423	1.2338	1.22564	1.18721	1.16526	1.17344	1.20186	1.11634	1.1194	1.14897	1.12405	1.14164	1.21171	1.16065	1.15377	1.17993	1.22215	1.21585	1.23185	1.23654	1.15235	1.1299	1.12737	1.15348	1.14381			1.17214	1.16798
218	154	3	1.08059	1.0776	1.08518	1.07796	1.07672	1.08443	1.07398	1.07573	1.07466	1.06946	1.08026	1.13251	1.11386	1.22401	1.2408	1.14806	1.14796	1.08707	1.12021	1.07654	1.07549	1.07685	1.08118	1.07745	1.0827	1.09237	1.08509	1.09503	1.08651	1.09338	1.11243	1.16961	1.19763	1.14887	1.12658	1.20801	1.20003	1.1672	1.13773	1.14598	1.09007	1.09696	1.08473			1.20028	1.16351
219	157	3	1.08536	1.08827	1.09132	1.08746	1.08741	1.08299	1.08393	1.08076	1.08497	1.08413	1.09877	1.0817	1.19778	1.23978	1.30902	1.29067	1.26261	1.12077	1.11915	1.08331	1.11274	1.08941	1.09654	1.17367	1.15808	1.15004	1.09077	1.10311	1.09427	1.09334	1.09372	1.14004	1.11619	1.11589	1.22064	1.13223	1.24043	1.15582	1.23825	1.09597	1.09589	1.13846	1.14494			1.19053	1.19127
220	155	3	1.08269	1.08415	1.08335	1.07889	1.08733	1.09268	1.13354	1.12289	1.12725	1.0836	1.07871	1.07401	1.15436	1.30232	1.31819	1.30531	1.27898	1.14464	1.13052	1.10035	1.07924	1.08938	1.11419	1.08622	1.08324	1.08798	1.09517	1.08714	1.0952	1.10345	1.09539	1.10842	1.0939	1.11769	1.13465	1.12066	1.20439	1.14656	1.23341	1.25857	1.1599	1.34178	1.25878			1.29005	1.0956
221	158	3	1.08712	1.07717	1.09496	1.07734	1.07867	1.09872	1.09094	1.13618	1.11716	1.10201	1.10965	1.14324	1.13752	1.21124	1.23556	1.26271	1.21576	1.21358	1.1983	1.17461	1.16999	1.16401	1.12769	1.12885	1.14646	1.14132	1.14415	1.14527	1.13585	1.13924	1.13392	1.12439	1.12761	1.12097	1.12307	1.12211	1.12713	1.12289	1.13391	1.11655	1.09612	1.11887	1.09953			1.2066	1.1545
222	159	3	1.16252	1.1029	1.11807	1.11434	1.14243	1.11296	1.11109	1.13036	1.11772	1.11387	1.1112	1.1235	1.3488	1.5199	1.51685	1.31245	1.36542	1.22276	1.13125	1.11034	1.10456	1.10743	1.12038	1.1169	1.10113	1.22735	1.15776	1.10515	1.10931	1.09755	1.10419	1.09695	1.10726	1.07858	1.1005	1.11033	1.10595	1.1125	1.10757	1.10551	1.08603	1.10534	1.11503			1.13617	1.1085
223	160	3	1.11741	1.09284	1.13306	1.23921	1.17332	1.09622	1.0949	1.11658	1.11159	1.10678	1.17486	1.21189	1.34378	1.40476	1.44987	1.44631	1.29255	1.25445	1.26766	1.27713	1.13042	1.11595	1.19398	1.20747	1.24987	1.13111	1.13303	1.11625	1.12702	1.12245	1.12342	1.13404	1.12788	1.09654	1.12656	1.11564	1.12626	1.13599	1.13126	1.13586	1.09691	1.13986	1.16128			1.26401	1.17967
224	161	3	1.08182	1.07682	1.18454	1.11251	1.13193	1.07554	1.07848	1.07437	1.07455	1.08654	1.13451	1.17231	1.22482	1.26086	1.26504	1.2876	1.28923	1.26368	1.24223	1.23304	1.15365	1.16507	1.13808	1.12935	1.12695	1.1151	1.11188	1.10315	1.14202	1.10677	1.13681	1.08527	1.08829	1.07317	1.11752	1.13085	1.07946	1.11736	1.11551	1.11715	1.07187	1.12699	1.171			1.17202	1.17492
225	162	3	1.1133	1.07359	1.107	1.10815	1.15477	1.24086	1.17115	1.16635	1.14445	1.17186	1.08295	1.09198	1.23725	1.28666	1.29115	1.26988	1.19421	1.18599	1.1173	1.10444	1.10002	1.11447	1.10108	1.13829	1.19042	1.16709	1.24162	1.18299	1.18775	1.2228	1.27806	1.21607	1.21708	1.12755	1.22911	1.26675	1.29792	1.31966	1.30718	1.32323	1.14485	1.33638	1.3346			1.21738	1.1683
226	163	3	1.14939	1.08425	1.17092	1.12288	1.21471	1.17898	1.08518	1.09448	1.1092	1.09033	1.08741	1.08657	1.22396	1.32332	1.37791	1.36587	1.36962	1.30579	1.26762	1.18928	1.18059	1.20725	1.14017	1.15999	1.14255	1.10655	1.11202	1.15754	1.1706	1.15719	1.11873	1.08718	1.12187	1.11509	1.17165	1.16249	1.11414	1.12748	1.13414	1.13323	1.09108	1.09297	1.11598			1.24014	1.20473
227	164	3	1.086	1.07377	1.07372	1.07252	1.06684	1.06133	1.06559	1.0662	1.06714	1.0713	1.06997	1.06758	1.20674	1.22537	1.22856	1.22891	1.2425	1.18477	1.20173	1.08223	1.08219	1.07897	1.09071	1.08463	1.0879	1.07545	1.09894	1.08069	1.09229	1.10456	1.0784	1.07137	1.11958	1.06596	1.07833	1.07759	1.0869	1.09226	1.09201	1.08503	1.07934	1.09	1.10656			1.17811	1.17316
228	164	3	1.0711	1.05259	1.06663	1.06564	1.06793	1.06424	1.0606	1.06322	1.07264	1.06603	1.06844	1.06429	1.17178	1.17469	1.20826	1.17274	1.18266	1.13046	1.07757	1.0976	1.07585	1.08187	1.08843	1.08217	1.09804	1.08378	1.08496	1.08643	1.09267	1.08957	1.09834	1.09009	1.09901	1.08427	1.10666	1.10032	1.10378	1.09874	1.10225	1.10198	1.09444	1.10538	1.16466			1.17212	1.09578
[truncated: 143 more columns]
